# Supplementary material for: Systematic review of the actual emissions reductions of carbon offset projects across all major sectors
Source: Research Square preprint supplement (doi:10.21203/rs.3.rs-3149652/v1), 2023-07-27
Supplement: Supplementary file 1 [file 342798d32585af5fb856ecef.xlsx]

## Sheet: Relevance_check
record_id	Authors	Title	Abstract	DOI	asreview_ranking	Sector	Included	Reason for exclusion	Effect_size extracted	Comment
1023	Adrianzen, A.	improved cooking stoves and firewood consumption: quasi-experimental evidence from the northern peruvian andes	Over the past few decades, improved firewood cooking stoves have been massively distributed around the world, mainly with the purpose of decreasing fuelwood consumption among rural households. Surprisingly, rigorous "on the field" evidence on the causal impact of these devices is very limited. This paper estimates the impact of an improved stove design distributed in the Northern Peruvian Andes o…	10.1016/j.ecolecon.2013.02.010	NA	cookstoves	Yes	NA	Yes	Not in original sample
435	Alejo C., Walker W.S., Gorelik S.R., Potvin C.	community managed protected areas conserve aboveground carbon stocks: implications for redd+	Protected Areas (PAs) represent a broad spectrum of outcomes and governance systems. Among PAs, Community Managed PAs have emerged from communities that are not exclusively indigenous and have developed social organizations to acquire land rights, participate in forest governance, and in some cases, engage in REDD+. However, regardless of the scale or counterfactual, there is no clear consensus a…	10.3389/ffgc.2022.787978	38	Forestry	No	Document not relevant	No	PA are a regulatory approach, not conditional payments
7381	Alejo, C; Meyer, C; Walker, WS; Gorelik, SR; Josse, C; Aragon-Osejo, JL; Rios, S; Augusto, C; Llanos, A; Coomes, OT; Potvin, C	are indigenous territories effective natural climate solutions? a neotropical analysis using matching methods and geographic discontinuity designs	Indigenous Territories (ITs) with less centralized forest governance than Protected Areas (PAs) may represent cost-effective natural climate solutions to meet the Paris agreement. However, the literature has been limited to examining the effect of ITs on deforestation, despite the influence of anthropogenic degradation. Thus, little is known about the temporal and spatial effect of allocating ITs…	10.1371/journal.pone.0245110	63	Forestry	No	Document not relevant	No	Focus on Indigeneous Territories
2422	Alexeew, J; Bergset, L; Meyer, K; Petersen, J; Schneider, L; Unger, C	an analysis of the relationship between the additionality of cdm projects and their contribution to sustainable development	The Clean Development Mechanism (CDM) allows industrialised countries to use credits from greenhouse gas abatement projects in developing countries in order to fulfil their own emission reduction commitments. There has been mounting evidence that the CDM's ability to fulfil its goals as stipulated by the Kyoto Protocol-contributing to the sustainable development of the host countries and deliveri…	10.1007/s10784-010-9121-y	1	Generic	No	Study does not contain a credible control group	No	No credible counterfactual
2228	Alix-Garcia J.M., Shapiro E.N., Sims K.R.E.	forest conservation and slippage: evidence from mexico's national payments for ecosystem services program	We investigate a Mexican federal program that compensates landowners for forest protection. We use matched controls from the program applicant pool to establish counterfactual deforestation rates. Deforestation was reduced by 50% in enrolled parcels, but expected average clearing rates without the program were low (0.8% per year), suggesting modest total avoided deforestation benefits. We test fo…	10.3368/le.88.4.613	10	Forestry	Yes	NA	Yes
1071	Alix-Garcia J.M., Sims K.R.E., Orozco-Olvera V.H., Costica L.E., Fernández Medina J.D., Monroy S.R.	payments for environmental services supported social capital while increasing land management	Payments for environmental services (PES) programs incentivize landowners to protect or improve natural resources. Many conservationists fear that introducing compensation for actions previously offered voluntarily will reduce social capital (the institutions, relationships, attitudes, and values that govern human interactions), yet little rigorous research has investigated this concern. We exami…	10.1073/pnas.1720873115	43	Forestry	No	Document not relevant	No
1731	Alix-Garcia J.M., Sims K.R.E., Yañez-Pagans P.	only one tree from each seed? environmental effectiveness and poverty alleviation in mexico's payments for ecosystem services program	Environmental conditional cash transfers are popular but their impacts are not well understood. We evaluate land cover and wealth impacts of a federal program that pays landowners for protecting forest. Panel data for program beneficiaries and rejected applicants allow us to control for fixed differences and time trends affecting both groups. We find the program reduces the expected land cover lo…	10.1257/pol.20130139	1	Forestry	Yes	NA	Yes
3246	Andam, KS; Ferraro, PJ; Hanauer, MM	the effects of protected area systems on ecosystem restoration: a quasi-experimental design to estimate the impact of costa rica's protected area system on forest regrowth	Global efforts to protect forest biodiversity and ecosystem services rely heavily on protected areas. Although these areas primarily aim to prevent losses from deforestation and degradation, they can also contribute to restoration. Previous evaluations of protected area impacts focus on avoided deforestation and fires. In contrast, we focus on the additional regrowth induced by Costa Rica's renow…	10.1111/conl.12004	49	Forestry	No	Document not relevant	No
635	Anenberg S.C., Henze D.K., Lacey F., Irfan A., Kinney P., Kleiman G., Pillarisetti A.	air pollution-related health and climate benefits of clean cookstove programs in mozambique	Approximately 95% of households in Mozambique burn solid fuels for cooking, contributing to elevated indoor and outdoor fine particulate matter (PM2.5) concentrations and subsequent health and climate impacts. Little is known about the potential health and climate benefits of various approaches for expanding the use of cleaner stoves and fuels in Mozambique. We use state-of-the-science methods to…	10.1088/1748-9326/aa5557	9	cookstoves	No	Study does not contain a credible control group	No	Prediction based on cooking test
293	Arriagada R.A., Ferraro P.J., Sills E.O., Pattanayak S.K., Cordero-Sancho S.	do payments for environmental services affect forest cover? a farm-level evaluation from costa rica	Payments for environmental services (PES) are popular despite little empirical evidence of their effectiveness. We estimate the impact of PES on forest cover in a region known for exemplary implementation of one of the best-known and longest-lived PES programs. Our evaluation design combines sampling that incorporates prematching, data from remote sensing and household surveys, and empirical meth…	10.3368/le.88.2.382	9	Forestry	Yes	NA	Yes
726	Aung T.W., Jain G., Sethuraman K., Baumgartner J., Reynolds C., Grieshop A.P., Marshall J.D., Brauer M.	health and climate-relevant pollutant concentrations from a carbon-finance approved cookstove intervention in rural india	Efforts to introduce more efficient stoves increasingly leverage carbon-finance to scale up dissemination of interventions. We conducted a randomized intervention study to evaluate a Clean Development Mechanism approved stove replacement impact on fuelwood usage, and climate and health-relevant air pollutants. We randomly assigned 187 households to either receive the intervention or to continue u…	10.1021/acs.est.5b06208	4	cookstoves	Yes	NA	Yes
8457	Balatbat M.C.A., Findlay E., Carmichael D.G.	performance risk associated with renewable energy cdm projects	The clean development mechanism (CDM), part of the Kyoto Protocol to combat rising carbon emissions, allows projects to proceed in developing countries in return for providing carbon credits to developed countries. The feasibility of CDM projects is commonly justified through a combination of sale of the end product and carbon credits, which have a financial value, generated through carbon emissi…	10.1061/(asce)me.1943-5479.0000090	4	RES	No	Study does not contain a credible control group	No	Perhaps still worth a read, esp on estimated vs real reductions
11634	Barnes, Q	the argentine garbage boom: two successful cases of technology transfer in the clean development mechanism	The Clean Development Mechanism (CDM) is the world's most extensive carbon market. It was constructed as part of the Kyoto Protocol to help lower greenhouse gas emissions while stimulating developing nations, partly through the transfer of 'green' technology. This study measures the technology transfer achieved in Argentina during its participation in the CDM and identifies two successful cases o…	NA	9	Industry	No	Study does not contain a credible control group	No	No counterfactual
1022	Beltramo T., Levine D.I.	the effect of solar ovens on fuel use, emissions and health: results from a randomised controlled trial	Inefficient cookstoves contribute to deforestation and global climate change, require substantial time (usually of women and girls) collecting wood or money for fuel and lead to just under two million deaths a year. We examined the effect of solar ovens on fuel use, time spent collecting wood, carbon monoxide exposure, and respiratory illness symptoms. A phased randomised controlled trial was run…	10.1080/19439342.2013.775177	2	cookstoves	Yes	NA	Yes
1047	Bensch G., Peters J.	alleviating deforestation pressures? impacts of improved stove dissemination on charcoal consumption in urban senegal	With 2.7 billion people relying on woodfuel for cooking in developing countries, the dissemination of improved cooking stoves (ICSs) is frequently considered an effective instrument to combat deforestation, particularly in arid countries. This paper evaluates the impacts of an ICS dissemination project in urban Senegal on charcoal consumption, using data collected among 624 households. The virtue…	10.3368/le.89.4.676	3	cookstoves	Yes	NA	Yes
6104	Boodlal, D; Alexander, D	the impact of the clean development mechanism and enhanced oil recovery on the economics of carbon capture and geological storage for trinidad and tobago	Carbon capture and storage (CCS) have been identified as one of the more promising carbon dioxide (CO2) emission mitigation techniques in the short term. One of the major issues involved in the implementation of this technology is the high cost incurred in the capture process. When this high cost is coupled with the associated transportation and geological storage costs, the overall process is of…	10.1016/j.egypro.2014.11.677	13	Industry	No	Study does not contain a credible control group	No	No counterfactual
95	Bopp C., Engler A., Jara-Rojas R., Arriagada R.	are forest plantation subsidies affecting land use change and off-farm income? a farm-level analysis of chilean small forest landowners	Forest plantations have increased rapidly in the last three decades, to a large extent due to direct and indirect financial incentives. At the farm level, forestry incentives can affect the investment decisions of small forest landowners and bring socioeconomic externalities or unintended effects associated with farm management. The purpose of this study is to assess the ex post impacts of a fore…	10.1016/j.landusepol.2019.104308	75	Forestry	No	Study does not contain a credible control group	No
1280	Bos A.B., Duchelle A.E., Angelsen A., Avitabile V., De Sy V., Herold M., Joseph S., De Sassi C., Sills E.O., Sunderlin W.D., Wunder S.	comparing methods for assessing the effectiveness of subnational redd+ initiatives	The central role of forests in climate change mitigation, as recognized in the Paris agreement, makes it increasingly important to develop and test methods for monitoring and evaluating the carbon effectiveness of REDD+. Over the last decade, hundreds of subnational REDD+ initiatives have emerged, presenting an opportunity to pilot and compare different approaches to quantifying impacts on carbon…	10.1088/1748-9326/aa7032	3	Forestry	Yes	NA	Yes
1755	Brandt J.S., Butsic V., Schwab B., Kuemmerle T., Radeloff V.C.	the relative effectiveness of protected areas, a logging ban, and sacred areas for old-growth forest protection in southwest china	Forests are critically important for life on earth, prompting a variety of efforts to protect them. Protected areas and logging regulations are the most commonly used forest conservation strategies, but local traditions and religious beliefs can also protect natural resources by limiting exploitative use. We compared the effectiveness of protected areas, a logging ban, and sacred areas to protect…	10.1016/j.biocon.2014.09.043	66	Forestry	No	Study does not contain a credible control group	No	PAs
761	Brooks N., Bhojvaid V., Jeuland M.A., Lewis J.J., Patange O., Pattanayak S.K.	how much do alternative cookstoves reduce biomass fuel use? evidence from north india	Despite widespread global efforts to promote clean cookstoves to achieve improvements in air and forest quality, and to reduce global climate change, surprisingly little is known about the degree to which these actually reduce biomass fuel consumption in real-world settings. Using data from in-house weighing of fuel conducted in rural India, we examine the impact of cleaner cookstoves - most of w…	10.1016/j.reseneeco.2015.12.001	11	cookstoves	Yes	NA	Yes
4781	Brownson, K; Anderson, EP; Ferreira, S; Wenger, S; Fowler, L; German, L	governance of payments for ecosystem ecosystem services influences social and environmental outcomes in costa rica	Payments for Ecosystem Services (PES) programs are used to achieve both ecosystem services and human well-being objectives. PES employs various governance structures, from top-down, national programs to local, community-managed initiatives. We compare the land use, ecosystem services and human well-being impacts of Costa Rica's national PES program with local PES programs in the Bellbird Biologic…	10.1016/j.ecolecon.2020.106659	21	Forestry	No	Study does not contain a credible control group	No	No control
124	Burivalova Z., Allnutt T.F., Rademacher D., Schlemm A., Wilcove D.S., Butler R.A.	what works in tropical forest conservation, and what does not: effectiveness of four strategies in terms of environmental, social, and economic outcomes	Tropical forests and their biodiversity are disappearing, despite decades of conservation efforts. Are we now in a position to understand whether some conservation strategies work better while others consistently fail in protecting tropical forests? We searched the literature to evaluate four mainstream strategies (forest certification and reduced impact logging, payments for ecosystem services, …	10.1111/csp2.28	69	Forestry	No	Document not relevant	No	Review – Might still be interesting
1109	Burwen J., Levine D.I.	a rapid assessment randomized-controlled trial of improved cookstoves in rural ghana	We conducted a rapid assessment randomized-controlled trial to quantify changes in fuel use, exposure to smoke, and self-reported health attributable to deployment of an improved wood cookstove in the Upper West region of Ghana. Women trainers from neighboring villages taught participants to build an improved cookstove and demonstrated optimal cooking techniques on such stoves. Participants were …	10.1016/j.esd.2012.04.001	6	cookstoves	No	Study does not contain a credible control group	No
762	Calle A.	can short-term payments for ecosystem services deliver long-term tree cover change?	Payments for ecosystem services (PES) have been heralded as an effective strategy to increase tree cover in agricultural landscapes, but their efficacy beyond the payment period has rarely been evaluated. I compared land covers before and 13 years after implementation of a short-term PES project that promoted the adoption of silvopastoral systems (SPS) in a cattle ranching landscape in Colombia. …	10.1016/j.ecoser.2020.101084	79	Forestry	No	Study does not contain a credible control group	No	No credible control
0	Carrilho C.D., Demarchi G., Duchelle A.E., Wunder S., Morsello C.	permanence of avoided deforestation in a transamazon redd+ project (pará, brazil)	Rigorous impact evaluations of local REDD+ (reduced emissions from deforestation and forest degradation) initiatives have shown some positive outcomes for forests, while well-being impacts have been mixed. However, will REDD+ outcomes persist over time after interventions have ended? Using quasi-experimental methods, we investigated the effects of one REDD+ project in the Brazilian Amazon on defo…	10.1016/j.ecolecon.2022.107568	16	Forestry	Yes	NA	Yes
1236	Chervier C., Costedoat S.	heterogeneous impact of a collective payment for environmental services scheme on reducing deforestation in cambodia	Payments for Environmental Services (PES) are increasingly used in tropical countries as incentives to improve forest conservation outcomes, notably in forests managed or owned by rural communities. However, little is known about the performance and the suitable conditions under which collective PES can be effective. We assess the impact of a collective PES on reducing deforestation in the Cardam…	10.1016/j.worlddev.2017.04.014	18	Forestry	Yes	NA	Yes
478	Cisneros E., Börner J., Pagiola S., Wunder S.	impacts of conservation incentives in protected areas: the case of bolsa floresta, brazil	Conditional incentives are a promising complementary approach to conserve tropical forests, for example, in multiple-use protected areas. In this paper we analyze the environmental impacts of Bolsa Floresta, a forest conservation program that combines direct conditional payments with livelihood-focused investments in 15 multiple-use reserves in the Brazilian state of Amazonas. We use grid-based d…	10.1016/j.jeem.2021.102572	30	Forestry	Yes	NA	Yes
1715	Clements T., Milner-Gulland E.J.	impact of payments for environmental services and protected areas on local livelihoods and forest conservation in northern cambodia	The potential impacts of payments for environmental services (PES) and protected areas (PAs) on environmental outcomes and local livelihoods in developing countries are contentious and have been widely debated. The available evidence is sparse, with few rigorous evaluations of the environmental and social impacts of PAs and particularly of PES. We measured the impacts on forests and human well-be…	10.1111/cobi.12423	24	Forestry	Yes	NA	Yes
16	Collins A.C., Grote M.N., Caro T., Ghosh A., Thorne J., Salerno J., Mulder M.B.	how community forest management performs when redd+ payments fail	The reduced emissions in deforestation and degradation (REDD+) initiative uses payments for ecosystem services as incentives for developing countries to manage and protect their forests. REDD+ initiatives also prioritize social (and environmental) co-benefits aimed at improving the livelihoods of communities that are dependent on forests. Despite the incorporation of co-benefits into REDD+ goals,…	10.1088/1748-9326/ac4b54	56	Forestry	No	Document not relevant	No	Pure focus on co-benefits, not carbon
731	Correa J., Cisneros E., Börner J., Pfaff A., Costa M., Rajão R.	evaluating redd+ at subnational level: amazon fund impacts in alta floresta, brazil	The Amazon Fund is the world's largest program to reduce emissions from deforestation and forest degradation (REDD+), funded with over US $1b donated by Norway and Germany between 2008 and 2017 to reward Brazil for prior deforestation reductions. Olhos D'Água da Amazônia is cited as a leading project success − with over one thousand small-to-medium-sized crop and livestock producers in the munici…	10.1016/j.forpol.2020.102178	4	Forestry	Yes	NA	Yes
1695	Costedoat S., Corbera E., Ezzine-de-Blas D., Honey-Rosés J., Baylis K., Castillo-Santiago M.A.	how effective are biodiversity conservation payments in mexico?	We assess the additional forest cover protected by 13 rural communities located in the southern state of Chiapas, Mexico, as a result of the economic incentives received through the country's national program of payments for biodiversity conservation. We use spatially explicit data at the intra-community level to define a credible counterfactual of conservation outcomes. We use covariate-matching…	10.1371/journal.pone.0119881	11	Forestry	Yes	NA	Yes
1457	Couth R., Trois C.	sustainable waste management in africa through cdm projects	Only few Clean Development Mechanism (CDM) projects (traditionally focussed on landfill gas combustion) have been registered in Africa if compared to similar developing countries. The waste hierarchy adopted by many African countries clearly shows that waste recycling and composting projects are generally the most sustainable. This paper undertakes a sustainability assessment for practical waste …	10.1016/j.wasman.2012.02.022	8	Industry	No	Study does not contain a credible control group	No	No counterfactual
1534	Cuenca P., Arriagada R., Echeverría C.	how much deforestation do protected areas avoid in tropical andean landscapes?	For many decades, protected areas (PAs) have been considered by decision makers and conservation practitioners as one of the most common policies to promote biodiversity conservation. Diverse studies have assessed the impact of conservation policies at global and regional levels by comparing deforestation rates between PAs and unprotected areas. Most of these studies are based on conventional met…	10.1016/j.envsci.2015.10.014	33	Forestry	No	Document not relevant	No	PA are a regulatory approach, not conditional payments
157	Cuenca P., Robalino J., Arriagada R., Echeverría C.	are government incentives effective for avoided deforestation in the tropical andean forest?	In order to ensure the provision of goods and services from forests, many governments have promoted less-traditional conservation initiatives such as programs of payments for ecosystem services called, more broadly, direct payments for conservation. The Socio Bosque Program (SBP) is a governmental program in Ecuador that directly provides economic incentives to rural families and local and indige…	10.1371/journal.pone.0203545	83	Forestry	Yes	NA	Yes
391	de Assis Barros L., Venter M., Delgado J.P.R., Coelho-Junior M.G., Venter O.	no evidence of local deforestation leakage from protected areas establishment in brazil's amazon and atlantic forest	Establishing Protected areas (PAs) could displace or cause ‘leakage’ of deforestation into adjacent areas. Such leakage would potentially offset PAs' conservation effort by jeopardizing forest conservation goals and impeding financial mechanisms such as Reducing Emissions from Deforestation and forest Degradation - REDD+. Here we investigate forest loss inside PAs' borders and whether leakage occ…	10.1016/j.biocon.2022.109695	34	Forestry	No	Document not relevant	No	PA are a regulatory approach, not conditional payments
1090	Duchelle A.E., Simonet G., Sunderlin W.D., Wunder S.	what is redd+ achieving on the ground?	The Paris Climate Agreement recognizes the importance of the mechanism to Reduce Emissions from Deforestation and forest Degradation, and enhance carbon stocks (REDD+). We reviewed 45 articles from the recent scientific literature to understand the outcomes of REDD+ interventions on the ground, in terms of local participation in REDD+, and its carbon and non-carbon (e.g. tenure, well-being, biodi…	10.1016/j.cosust.2018.07.001	62	Forestry	No	Document not relevant	No	Review
1456	El-Fadel M., Abi-Esber L., Salhab S.	emission assessment at the burj hammoud inactive municipal landfill: viability of landfill gas recovery under the clean development mechanism	This paper examines landfill gas (LFG) emissions at a large inactive waste disposal site to evaluate the viability of investment in LFG recovery through the clean development mechanism (CDM) initiative. For this purpose, field measurements of LFG emissions were conducted and the data were processed by geospatial interpolation to estimate an equivalent site emission rate which was used to calibrat…	10.1016/j.wasman.2011.12.027	12	Industry	No	Study does not contain a credible control group	No	No counterfactual
705	Ellis E.A., Sierra-Huelsz J.A., Ceballos G.C.O., Binnqüist C.L., Cerdán C.R.	mixed effectiveness of redd+ subnational initiatives after 10 years of interventions on the yucatan peninsula, mexico	Since 2010, the Reducing Emissions from Deforestation and Degradation (REDD+) mechanism has been implemented in Mexico's Yucatan Peninsula, a biodiversity hotspot with persistent deforestation problems. We apply the before-after-control-intervention approach and quasi-experimental methods to evaluate the effectiveness of REDD+ interventions in reducing deforestation at municipal (meso) and commun…	10.3390/f11091005	5	Forestry	Yes	NA	Yes
22	Erbaugh J.T.	impermanence and failure: the legacy of conservation-based payments in sumatra, indonesia	Projects that pay communities or individuals to conserve natural areas rarely continue indefinitely. When payments cease, the behaviors they motivate can change. Previous research on conservation-based payments recognizes the impermanence of conservation success, but it does not consider the legacy of payments that failed to effect change. This research assesses impermanence and failure by invest…	10.1088/1748-9326/ac6437	68	Forestry	Yes	NA	Yes
849	Erlewein A., Nüsser M.	offsetting greenhouse gas emissions in the himalaya? clean development dams in himachal pradesh, india	The carbon-offsetting scheme Clean Development Mechanism (CDM) has evolved into one of the most important instruments for the funding of renewable energy projects in mountain regions in developing and newly industrializing countries. The CDM allows industrialized states to compensate for greenhouse gas emissions by investing in climate change mitigation activities abroad. These offsetting project…	10.1659/mrd-journal-d-11-00054.1	5	Generic	No	Study does not contain a credible control group	No
13	España F., Arriagada R., Melo O., Foster W.	forest plantation subsidies: impact evaluation of the chilean case	Over the past half century there has been a rapid expansion of the forestry sector in Chile. One hypothesis is that this growth was stimulated in major part by government-supported financial incentives to forestry plantations dating from the mid-1970s. Evaluating the effects of subsidies on plantations is of current policy interest due to the potential importance of forests as carbon sinks. This …	10.1016/j.forpol.2022.102696	72	Forestry	Yes	NA	Yes
660	Etchart N., Freire J.L., Holland M.B., Jones K.W., Naughton-Treves L.	what happens when the money runs out? forest outcomes and equity concerns following ecuador's suspension of conservation payments	Payments for Ecosystem Services (PES) are now a prominent policy instrument for conserving tropical forests. PES are voluntary, direct, and contractual: an ES buyer pays an ES steward for adopting conservation practices for a fixed term. A defining feature of PES is its ‘quid pro quo’ conditionality, e.g. stewards are paid only if they deliver contracted conservation outcomes. Most studies on PES…	10.1016/j.worlddev.2020.105124	29	Forestry	Yes	NA	Yes	Still need to extract most other infos
15087	Fearnside, PM	credit for climate mitigation by amazonian dams: loopholes and impacts illustrated by brazil's jirau hydroelectric project	Tropical hydroelectric dams are now one of the main destinations for funds under the Kyoto Protocol's Clean Development Mechanism (CDM), with 1482 dams approved for credit and 840 dams in the CDM 'pipeline' awaiting approval. Thousands of dams are being built by countries such as China, India and Brazil, irrespective of any additional subsidy based on mitigation of climate change. Carbon credit g…	10.4155/cmt.13.57	8	RES	No	Study does not contain a credible control group	No	Interesting study on dams
3653	Fonseca, CA; Drummond, JA	the payments for environmental services program in costa rica: an assessment of the program's early years	Costa Rica's Payment for Environmental Services Program-PESP was launched in 1997. It is a market-oriented policy instrument designed to stimulate forest conservation by making monetary payments to landowners who choose not to engage in deforestation or to engage in forest recovery or plantations on their properties. This article focuses on the basic concepts and on the early years of the program…	10.5380/dma.v33i0.37003	58	Forestry	No	Study does not contain a credible control group	No	No control
971	Fu G., Uchida E., Shah M., Deng X.	impact of the grain for green program on forest cover in china	China’s Grain for Green (GFG) program, one of the world’s largest Payments for Environmental Services programs, has been implemented for more than ten years. However, empirical evidence on its impact on increasing the forest cover is still lacking. The goal of this research is to estimate GFG’s effect on the total forest cover and examine its heterogeneity across four types of forests. To do so, …	10.1080/21606544.2018.1552626	55	Forestry	Yes	NA	Yes	The standard error is not reported, but report t-statistics
1869	Fu, N; Mu, HL; Li, N	the impact of carbon trading on china's renewable energy investment: case of cdm wind power projects	Taking the Clean Development Mechanism (CDM) wind power project as an example, this paper analyses the impact of carbon trading on China's renewable energy investment. Based on the data of Certified Emissions Reductions (CERs) price and the registered volume of CDM wind power projects in China from 2008 to 2015, the correlation between the investment decision of CDM wind power projects and the ca…	10.1088/1755-1315/446/2/022054	13	Generic	No	Study does not contain a credible control group	No	No counterfactual
3008	Gangale, F; Mengolini, A	cdm contribution to res penetration in the power generation sector of china and india	The clean development mechanism (CDM) could play an important role in the power generation sector of developing countries and emerging economies by providing additional revenue to support the diffusion of renewable energy sources (RES). This paper investigates the contribution of the CDM to deployment of renewable electricity projects in China and India, and highlights the main potentialities and…	10.1080/13504509.2011.553354	12	Generic	No	Study does not contain a credible control group	No	No counterfactual
820	Garland C., Jagoe K., Wasirwa E., Nguyen R., Roth C., Patel A., Shah N., Derby E., Mitchell J., Pennise D., Johnson M.A.	impacts of household energy programs on fuel consumption in benin, uganda, and india	This paper presents results of three United States Environmental Protection Agency (U.S. EPA) sponsored field studies which assessed the fuel consumption impacts of household energy programs in Benin, Uganda, and Gujarat, India. These studies expand on a previous round of U.S. EPA supported efforts to build field testing capacity and collect stove performance data in Peru, Nepal, and Maharashtra,…	10.1016/j.esd.2014.05.005	14	cookstoves	No	Study does not contain a credible control group	No	Cooking test
452	Gitau J.K., Mutune J., Sundberg C., Mendum R., Njenga M.	implications on livelihoods and the environment of uptake of gasifier cook stoves among kenya's rural households	A majority of people in developing countries use biomass energy for cooking and heating due to its affordability, accessibility and convenience. However, unsustainable biomass use leads to forest degradation and climate change. Therefore, this study was carried out in Kwale County, Kenya, on the use of a biochar-producing gasifier cook stove and implications of its uptake on livelihoods and the e…	10.3390/app9061205	10	cookstoves	No	Study does not contain a credible control group	No	No control group, merely before and after
918	Giudice R., Börner J., Wunder S., Cisneros E.	selection biases and spillovers from collective conservation incentives in the peruvian amazon	Payments for ecosystem services are becoming popular components in strategies to conserve ecosystems and biodiversity, but their effectiveness remains poorly documented. Here we present counterfactual-based evidence on the conservation outcomes of the pilot stage of Peru's National Forest Conservation Program (NFCP). The NFCP provides direct payments to indigenous communities in the Amazon, condi…	10.1088/1748-9326/aafc83	25	Forestry	Yes	NA	Yes
554	Gordillo F., Eguiguren P., Köthke M., Velasco R.F., Elsasser P.	additionality and leakage resulting from pes implementation? evidence from the ecuadorian amazonia	Payments for Environmental Services (PES) are instruments which seem well suited for forest conservation. However, their impact on reducing deforestation might be weakened by negligible additionality and leakage effects; the first refers to the low variation in net deforestation rates even in the absence of PES, and the second refers to the displaced deforestation behavior to other areas not cove…	10.3390/f12070906	19	Forestry	No	Study does not contain a credible control group	No	Study contains control group but control group not matched on observable characteristics and seems to be quite different to treatment group (e.g., in terms of historical deforestation patterns, see Table 2, p.7)
895	Green A.G., Unruh J.D.	clean development mechanism afforestation and reforestation projects: implications for local agriculture	The potential of Clean Development Mechanism Afforestation and Reforestation (CDM A/R) projects to contribute to climate change mitigation and sustainable development is widely recognized. Yet, problems with the design and implementation of CDM A/R projects have limited analyses of project outcomes. In fact, of the nearly 1400 registered CDM projects in early January 2009, there was only one A/R …	10.1079/pavsnnr20105057	4	Generic	No	Document not relevant	No	Review: CDM and AR
780	Hanna R., Duflo E., Greenstone M.	up in smoke: the influence of household behavior on the long-run impact of improved cooking stoves	Laboratory studies suggest that improved cooking stoves can reduce indoor air pollution, improve health, and decrease greenhouse gas emissions in developing countries. We provide evidence, from a large-scale randomized trial in India, on the benefits of a common, laboratory-validated stove with a four-year follow-up. While smoke inhalation initially falls, this effect disappears by year two. We f…	10.1257/pol.20140008	1	cookstoves	Yes	NA	Yes
1619	Haya B., Cullenward D., Strong A.L., Grubert E., Heilmayr R., Sivas D.A., Wara M.	managing uncertainty in carbon offsets: insights from california’s standardized approach	Carbon offsets allow greenhouse gas emitters to comply with an emissions cap by paying others outside of the capped sectors to reduce emissions. The first major carbon offset programme, the United Nations’ Clean Development Mechanism (CDM), has been criticized for generating a large number of credits from projects that do not actually reduce emissions. Following the controversial CDM experience, …	10.1080/14693062.2020.1781035	2	Industry	No	Study does not contain a credible control group	No	CITE
479	Hayes T., Murtinho F., Wolff H., López-Sandoval M.F., Salazar J.	effectiveness of payment for ecosystem services after loss and uncertainty of compensation	Payment for ecosystem services (PES) programmes seek to promote conservation via payments for desired resource-use behaviours. While PES has been found to produce some ecological and livelihood benefits, an understudied concern is what happens when payments stop. We assess how households’ land-use behaviours changed in response to a temporary gap in payments and subsequent payment uncertainty in …	10.1038/s41893-021-00804-5	67	Forestry	Yes	NA	Yes
76	Heilmayr R., Echeverría C., Lambin E.F.	impacts of chilean forest subsidies on forest cover, carbon and biodiversity	In response to the important benefits forests provide, there is a growing effort to reforest the world. Past policies and current commitments indicate that many of these forests will be plantations. Since plantations often replace more carbon-rich or biodiverse land covers, this approach to forest expansion may undermine objectives of increased carbon storage and biodiversity. We use an econometr…	10.1038/s41893-020-0547-0	7	Forestry	No	Document not relevant	No	Simulation, not an impact assessment
2300	Honey-Ros√es J., Baylis K., Ram√≠rez M.I.	a spatially explicit estimate of avoided forest loss	With the potential expansion of forest conservation programs spurred by climate-change agreements, there is a need to measure the extent to which such programs achieve their intended results. Conventional methods for evaluating conservation impact tend to be biased because they do not compare like areas or account for spatial relations. We assessed the effect of a conservation initiative that com…	10.1111/j.1523-1739.2011.01729.x	NA	Forestry	Yes	NA	Yes	Not in original sample
2300	Honey-Rosés J., Baylis K., Ramírez M.I.	a spatially explicit estimate of avoided forest loss	With the potential expansion of forest conservation programs spurred by climate-change agreements, there is a need to measure the extent to which such programs achieve their intended results. Conventional methods for evaluating conservation impact tend to be biased because they do not compare like areas or account for spatial relations. We assessed the effect of a conservation initiative that com…	10.1111/j.1523-1739.2011.01729.x	37	Forestry	No	Document not relevant	No	Focus primarily on biodiversity, not carbon
1857	Huang, YF; Barker, T	the clean development mechanism and low carbon development: a panel data analysis	The Clean Development Mechanism (CDM) of Kyoto Protocol, designed for the industrialized countries to earn emission credits by investing in greenhouse gas (GHG) emission reduction projects in developing countries, shall contribute to emission reductions and sustainable development in the host countries. However, whether the CDM is achieving its dual goals has been questionable. This research empi…	10.1016/j.eneco.2011.08.010	3	Generic	No	Study does not contain a credible control group	No	Results too aggregated; no real counterfactual
4979	Jack, BK; Santos, EC	the leakage and livelihood impacts of pes contracts: a targeting experiment in malawi	Most evaluations of payments for environmental services programs focus on immediate environmental impacts, and do not measure the effects on socioeconomic outcomes or on other land use activities (leakage). Efficient allocation of land use contracts, through auctions for example, may help mitigate concerns about adverse livelihood or leakage effects. This study reports on a field experiment that …	10.1016/j.landusepol.2016.03.028	81	Forestry	No	Study does not contain a credible control group	No	No baseline control without treatment; interesting for discussion about permanence
185	Jayachandran S., De Laat J., Lambin E.F., Stanton C.Y., Audy R., Thomas N.E.	cash for carbon: a randomized trial of payments for ecosystem services to reduce deforestation	We evaluated a program of payments for ecosystem services in Uganda that offered forestowning households annual payments of 70,000 Ugandan shillings per hectare if they conserved their forest. The program was implemented as a randomized controlled trial in 121 villages, 60 of which received the program for 2 years. The primary outcome was the change in land area covered by trees, measured by clas…	10.1126/science.aan0568	6	Forestry	Yes	NA	Yes
256	Jeuland M.A., Pattanayak S.K., Samaddar S., Shah R., Vora M.	adoption and impacts of improved biomass cookstoves in rural rajasthan	Biomass-burning improved cookstoves (ICS) are often seen as a promising intermediate technology solution along the path of household transition to cleaner cooking. This study reports on the results of an experimental evaluation of a carbon finance-enabled program conducted in rural villages in Rajasthan, India. Half (or 20) of 40 purposively-selected treatment villages were randomly assigned to a…	10.1016/j.esd.2020.06.005	8	cookstoves	Yes	NA	Yes
1048	Johnson M.A., Pilco V., Torres R., Joshi S., Shrestha R.M., Yagnaraman M., Lam N.L., Doroski B., Mitchell J., Canuz E., Pennise D.	impacts on household fuel consumption from biomass stove programs in india, nepal, and peru	Published data from quantitative assessments of in-home fuel use in developing countries are sparse, yet this information is important for understanding the basic daily energy consumption of half the world's population as well as the effectiveness of programs seeking to reduce the health, environmental, and socioeconomic impacts of using inefficient cooking technologies and fuels. This paper pres…	10.1016/j.esd.2013.04.004	13	cookstoves	No	Study does not contain a credible control group	No
1339	Jones K.W., Holland M.B., Naughton-Treves L., Morales M., Suarez L., Keenan K.	forest conservation incentives and deforestation in the ecuadorian amazon	Forest conservation incentives are a popular approach to combatting tropical deforestation. Here we consider a case where direct economic incentives for forest conservation were offered to newly titled smallholders in a buffer zone of a protected area in the northeastern Ecuadorian Amazon. We used quasi-experimental impact evaluation methods to estimate changes in forest cover for 63 smallholders…	10.1017/s0376892916000308	28	Forestry	Yes	NA	Yes
1615	Jones K.W., Lewis D.J.	estimating the counterfactual impact of conservation programs on land cover outcomes: the role of matching and panel regression techniques	Deforestation and conversion of native habitats continues to be the leading driver of biodiversity and ecosystem service loss. A number of conservation policies and programs are implemented-from protected areas to payments for ecosystem services (PES)-to deter these losses. Currently, empirical evidence on whether these approaches stop or slow land cover change is lacking, but there is increasing…	10.1371/journal.pone.0141380	26	Forestry	Yes	NA	Yes
713	Jones K.W., Mayer A., Von Thaden J., Berry Z.C., López-Ramírez S., Salcone J., Manson R.H., Asbjornsen H.	measuring the net benefits of payments for hydrological services programs in mexico	A number of studies show that payments for ecosystem services (PES) programs contribute to reducing deforestation, but few have measured the impact on ecosystem service provision or compared economic benefits and costs of these programs. We integrate impact evaluation and ecosystem service measurement to examine the effects of PES programs in Veracruz, Mexico. We use quasi-experimental methods to…	10.1016/j.ecolecon.2020.106666	22	Forestry	Yes	NA	Yes
2360	Joppa L.N., Pfaff A.	global protected area impacts	Protected areas (PAs) dominate conservation efforts. They will probably play a role in future climate policies too, as global payments may reward local reductions of loss of natural land cover. We estimate the impact of PAs on natural land cover within each of 147 countries by comparing outcomes inside Pas with outcomes outside. We use 'matching' (or 'apples to apples') for land characteristics t…	10.1098/rspb.2010.1713	36	Forestry	No	Document not relevant	No
2458	Joppa L.N., Pfaff A.	high and far: biases in the location of protected areas	Background: About an eighth of the earth's land surface is in protected areas (hereafter "PAs"), most created during the 20th century. Natural landscapes are critical for species persistence and PAs can play a major role in conservation and in climate policy. Such contributions may be harder than expected to implement if new PAs are constrained to the same kinds of locations that PAs currently oc…	10.1371/journal.pone.0008273	40	Forestry	No	Document not relevant	No
562	Kelp M.M., Grieshop A.P., Reynolds C.C.O., Baumgartner J., Jain G., Sethuraman K., Marshall J.D.	real-time indoor measurement of health and climate-relevant air pollution concentrations during a carbon-finance-approved cookstove intervention in rural india	Biomass combustion in residential cookstoves is a major source of air pollution and a large contributor to the global burden of disease. Carbon financing offers a potential funding source for health-relevant energy technologies in low-income countries. We conducted a randomized intervention study to evaluate air pollution impacts of a carbon-finance-approved cookstove in rural South India. Prior …	10.1016/j.deveng.2018.05.001	5	cookstoves	No	Document not relevant	No	No measurement of relevant GHG
533	Koskimäki T., Eklund J., Moulatlet G.M., Tuomisto H.	impact of individual protected areas on deforestation and carbon emissions in acre, brazil	Protecting tropical forests from deforestation is important for mitigating both biodiversity loss and anthropogenic climate change. In Amazonia, a common approach to protected area (PA) impact studies has been to investigate differences among broad PA categories, such as strictly protected, sustainable use and indigenous areas, yet these may be insufficient for the management of PAs at local scal…	10.1017/s0376892921000229	35	Forestry	No	Document not relevant	No	PA are a regulatory approach, not conditional payments
891	Lambe F., Jürisoo M., Lee C., Johnson O.	can carbon finance transform household energy markets? a review of cookstove projects and programs in kenya	Billions of people use traditional renewable energy (wood, charcoal and dung) to cook in and heat their homes. These traditional methods create serious health and environmental hazards, leading to renewed efforts to bring cleaner, more efficient stoves to people around the world but particularly in Africa and Southeast Asia where poverty is highest. Through the Clean Development Mechanism (CDM) a…	10.1016/j.erss.2014.12.012	15	cookstoves	No	Document not relevant	No	Review
7475	Le Velly, G; Sauquet, A; Cortina-Villar, S	pes impact and leakages over several cohorts: the case of the psa-h in yucatan, mexico	We assess the impact of the PSA-H, a payment for environmental services scheme implemented in Mexico over the 2005-2012 period. By studying several cohorts of program beneficiaries we are able to shed light on the permanence of the program's impact. Based on the exploitation of 2.5 to 20 in resolution SPOT images and ejido surveys carried out in 76 ejidos located in the Cono Sur of Yucatan, we fi…	10.3368/le.93.2.230	77	Forestry	Yes	NA	Yes
10052	Lee, SJ; Ryu, IS; Jeon, SG; Moon, SH	emission sources and mitigation of fluorinated non-co2 greenhouse gas in registered cdm projects	Typical non-CO2 greenhouse gases in clean development mechanism (CDM) projects include methane (CH4), nitrous oxide (N2O), and fluorinated gases (F-gases). The use of F-gases, such as hydrofluorocarbons (HFCs), perfluorocarbons (PFCs), and sulfur hexafluoride (SF6), has increased sharply in the semiconductor and electronics manufacturing industries. The global warming potential of F-gases is very…	10.1002/ghg.1680	6	Industry	No	Study does not contain a credible control group	No	No counterfactual
2501	Liu J., Li S., Ouyang Z., Tam C., Chen X.	ecological and socioeconomic effects of china's policies for ecosystem services	To address devastating environmental crises and to improve human well-being, China has been implementing a number of national policies on payments for ecosystem services. Two of them, the Natural Forest Conservation Program (NFCP) and the Grain to Green Program (GTGP), are among the biggest programs in the world because of their ambitious goals, massive scales, huge payments, and potentially enor…	10.1073/pnas.0706436105	70	Forestry	No	Document not relevant	No	Commentary
1150	Ludwinski D., Moriarty K., Wydick B.	environmental and health impacts from the introduction of improved wood stoves: evidence from a field experiment in guatemala	Improved wood-burning stoves offer a possible solution that can simultaneously impact both problems of deforestation and problems of respiratory health in developing countries. We carried out a field experiment in which new fuel-efficient woodstoves were allocated in a Guatemalan village via the use of a lottery. A 2008 baseline survey was carried out on 2,148 individuals in 351 households, and t…	10.1007/s10668-011-9282-z	7	cookstoves	Yes	NA	Yes
2923	Malek, ABMA; Hasanuzzaman, M; Rahim, NA; Al-Turki, YA	energy, economic, and environmental analysis of 10-mw biomass gasification based power generation in malaysia	Biomass gasification based power plants can play an important role in power sector in Malaysia with her abundant agricultural and forest resources. In this research energy and economic feasibility, and environmental impact of biomass gasification power plant has been analyzed and assessed for sustainable power generation in Malaysia, the plant being a clean development mechanism supported project…	10.1177/0958305x20930386	18	Generic	No	Document not relevant	No
1863	Martin A., Gross-Camp N., Kebede B., McGuire S.	measuring effectiveness, efficiency and equity in an experimental payments for ecosystem services trial	There is currently a considerable effort to evaluate the performance of Payments for Ecosystem Services as an environmental management tool. The research presented here contributes to this work by using an experimental design to evaluate Payments for Ecosystem Services as a tool for supporting biodiversity conservation in the context of an African protected area. The trial employed a 'before and …	10.1016/j.gloenvcha.2014.07.003	71	Forestry	No	No effect size (or cannot be retrieved)	No	No actual ecological outcomes
2637	Meijaard E., Santika T., Wilson K.A., Budiharta S., Kusworo A., Law E.A., Friedman R., Hutabarat J.A., Indrawan T.P., Sherman J., St. John F.A.V., Struebig M.J.	toward improved impact evaluation of community forest management in indonesia	Many tropical countries continue to devolve forest management to forest-dwelling communities. The assumption is that local knowledge of forests and community engagement in forest management will attain multiple social and environmental co-benefits, such as poverty alleviation and reduced deforestation and fires. Evidence for this, however, is scant, commonly hampered by data availability and a la…	10.1111/csp2.189	52	Forestry	No	Document not relevant	No	Review
1000006	Mekonnen et al	Do improved biomass cookstoves reduce fuelwood consumption and carbon emissions? Evidence from a field experiment in rural Ethiopia	Using a randomized experimental design, real-time electronic stove surface temperature measurements and controlled cooking tests, we estimate fuelwood and CO2 savings from an improved cookstove (ICS) program in rural Ethiopia. Cooking uses a majority of the fuelwood in the country and therefore is a critical determinant of greenhouse gas emissions. Estimating fuelwood savings is therefore a key a…	10.1016/j.ecolecon.2022.107467	NA	cookstoves	Yes	NA	Yes	Not in original sample
177	Min-Venditti A.A., Moore G.W., Fleischman F.	what policies improve forest cover? a systematic review of research from mesoamerica	Despite many studies of the drivers of deforestation, few syntheses have been conducted of the effect of public policies on forest cover. This is problematic because policy is the primary tool that society can use to change outcomes, yet we lack information on the conditions which lead to successful policies. To address this deficiency, we conduct a meta-analysis of case studies of the impact of …	10.1016/j.gloenvcha.2017.08.010	39	Forestry	No	Document not relevant	No	But still interesting
173	Mohebalian P.M., Aguilar F.X.	beneath the canopy: tropical forests enrolled in conservation payments reveal evidence of less degradation	Assessments of programs offering payments for forest conservation have largely focused on their contribution to avoiding deforestation but have overlooked degradation. We integrated remotely-sensed forest cover images, georeferenced landscape information, field-level forest inventories and face-to-face landowner surveys to quantify avoided deforestation and degradation within the context of Ecuad…	10.1016/j.ecolecon.2017.06.038	32	Forestry	Yes	NA	Yes
842	Montoya-Zumaeta J., Rojas E., Wunder S.	adding rewards to regulation: the impacts of watershed conservation on land cover and household wellbeing in moyobamba, peru	We estimate the effects of Peru’s oldest watershed payments for environmental services (PES) initiative in Moyobamba (Andes–Amazon transition zone) and disentangle the complex intervention into its two main forest conservation treatments. First, a state-managed protected area (PA) was established, allowing sustainable use but drastically limiting de facto land use and land rights of households in…	10.1371/journal.pone.0225367	59	Forestry	Yes	NA	Yes
407	Montoya-Zumaeta J.G., Wunder S., Rojas E., Duchelle A.E.	does redd+ complement law enforcement? evaluating impacts of an incipient initiative in madre de dios, peru	Subnational initiatives to Reduce Emissions from Deforestation and forest Degradation and enhance carbon stocks (REDD+) have been implemented across the tropics over the last decade. Such initiatives are often embedded within pre-existing conservation policies, such as forest law enforcement, making it challenging to disentangle attributable impacts. In this article, we analyze a new REDD+ projec…	10.3389/ffgc.2022.870450	61	Forestry	Yes	NA	Yes
2309	Nelson A., Chomitz K.M.	effectiveness of strict vs. multiple use protected areas in reducing tropical forest fires: a global analysis using matching methods	Protected areas (PAs) cover a quarter of the tropical forest estate. Yet there is debate over the effectiveness of PAs in reducing deforestation, especially when local people have rights to use the forest. A key analytic problem is the likely placement of PAs on marginal lands with low pressure for deforestation, biasing comparisons between protected and unprotected areas. Using matching techniqu…	10.1371/journal.pone.0022722	31	Forestry	No	Document not relevant	No	Excluded, no conditional payments
NA	Nepal et al	Unbelievable but improved cookstoves are not helpful in reducing firewood demand in Nepal		10.1017/S1355770X10000409	NA	cookstoves	No	Study does not contain a credible control group	No	No credible counterfactual
7694	Nguyen, TQ; Huynh, NT; Hsu, WKK	estimate the impact of payments for environmental services on local livelihoods and environment: an application of propensity scores	Payments for environmental services (PES) are usually considered as a useful tool to both protect the environment and generate multiple income streams for mountainous households who receive the payments, and thus, it has been widely implementing in many developing countries so far; however, the impact of it on local livelihoods and environment has been questioned. Therefore, the article aimed to …	10.1177/21582440211040774	60	Forestry	No	Study does not contain a credible control group	No
3348	O'Kane, K	impact of carbon financing on the development of small scale run of river hydropower plants in malaysia during the period 2008-2012	This paper analyses the pipeline of Small Renewable Energy Producers in Malaysia during the period of 2008-2012 and investigates the effect of carbon financing in the development of small scale hydropower projects. The most common forms of carbon financing available in the CDM market during the period 2008-12 are also discussed. CDM projects must demonstrate that they are 'additional' to the busi…	NA	10	Generic	No	Study does not contain a credible control group	No	No counterfactual
1535	Ojea E., Loureiro M.L., Alló M., Barrio M.	ecosystem services and redd: estimating the benefits of non-carbon services in worldwide forests	Forest ecosystems are playing an increasingly important role in climate change mitigation through programs on Reducing Emissions from Deforestation and Forest Degradation (REDD), which targets carbon sequestration. However, decades of environmental valuation studies evidence the economic benefits of other forest ecosystem services different than carbon, and there is no evidence on how these econo…	10.1016/j.worlddev.2015.10.002	54	Forestry	No	Document not relevant	No	Review
92	Oliveira Fiorini A.C., Mullally C., Swisher M., Putz F.E.	forest cover effects of payments for ecosystem services: evidence from an impact evaluation in brazil	We evaluate the effects of “Water and Forest Producers” (PAF), a payment for ecosystem services project, on forest cover outcomes in a watershed serving the Rio de Janeiro region of Brazil. We apply propensity score matching and regression to 81 beneficiary properties on 8848 ha and 398 control properties on 33,748 ha. We estimate the average treatment effect on the treated for changes in rates o…	10.1016/j.ecolecon.2019.106522	50	Forestry	Yes	NA	Yes
1517	Pagiola S., Honey-Rosés J., Freire-González J.	evaluation of the permanence of land use change induced by payments for environmental services in quindío, colombia	The effectiveness of conservation interventions such as Payments for Environmental Services (PES) is often evaluated-if it is evaluated at all-only at the completion of the intervention. Since gains achieved by the intervention may be lost after it ends, even apparently successful interventions may not result in long-term conservation benefits, a problem known as that of permanence. This paper us…	10.1371/journal.pone.0147829	45	Forestry	Yes	NA	Yes
7539	Pattanayak, SK; Wunder, S; Ferraro, PJ	show me the money: do payments supply environmental services in developing countries?	Many of the services supplied by nature are externalities. Economic theory suggests that some form of subsidy or contracting between the beneficiaries and the providers could result in an optimal supply of environmental services. Moreover, if the poor own resources that give them a comparative advantage in the supply of environmental services, then payments for environmental services (PES) can im…	10.1093/reep/req006	44	Forestry	No	Document not relevant	No	Excluded, review
1544	Pedersen A.	exploring the clean development mechanism: malaysian case study	During 2006 the CDM market in Malaysia became established and by December 2007 a total of 20 Malaysian projects had registered with the CDM Executive Board.The Kyoto Protocol defines the Annex 1 countries, as countries that are obliged to reduce their greenhouse gas (GHG) emissions and the clean development mechanism (CDM) allows Annex 1 countries to develop projects, which contribute to emission…	10.1177/0734242x07087314	7	Industry	No	Study does not contain a credible control group	No	No counterfactual
9009	Pedott, JGJ; Aguiar, AO	biogas in sanitary landfills: comparing estimated generation with the verified amount in clean development projects	The systems to capture and burn landfill gas allow its use as fuel for generation of electricity or other energy purposes, and generation of carbon credits in projects of the Clean Development Mechanism and sale of the generated energy, essential for the economic viability of these kind of projects. In order to compare the estimates of landfill gas generation with the real production, it was stud…	10.15628/holos.2014.1715	11	Industry	No	Study does not contain a credible control group	No	No counterfactual
1826	Pfaff A., Robalino J., Lima E., Sandoval C., Herrera L.D.	governance, location and avoided deforestation from protected areas: greater restrictions can have lower impact, due to differences in location	For Acre, in the Brazilian Amazon, we find that protection types with differences in governance, including different constraints on local economic development, also differ in their locations. Taking this into account, we estimate the deforestation impacts of these protection types that feature different levels of restrictions. To avoid bias, we compare these protected locations with unprotected l…	10.1016/j.worlddev.2013.01.011	51	Forestry	No	Document not relevant	No	PAs
159	Phan T.-H.D., Brouwer R., Hoang L.P., Davidson M.D.	do payments for forest ecosystem services generate double dividends? an integrated impact assessment of vietnam’s pes program	Payments for ecosystem services (PES) often serve multiple objectives, such as carbon emission reduction and poverty alleviation. However, the effectiveness of PES as an instrument to achieve these multiple objectives, in particular in a conservation-development context, is often questioned. This study adds to the very limited empirical evidence base and investigates to what extent Vietnam’s move…	10.1371/journal.pone.0200881	47	Forestry	No	Study does not contain a credible control group	No	No control group for the forest interventions
2973	Potdar, A; Singh, A; Unnikrishnan, S; Naik, N; Naik, M; Nimkar, I; Patil, V	innovation in solid waste management through clean development mechanism in developing countries	Municipal Solid Waste (MSW) has emerged as a core issue, which needs to be tackled effectively in developing countries. The burgeoning population indicates increased MSW generation rates indirectly posing challenge to the final disposal. The final disposal is of critical importance as it largely impacts the environment and public health. A number of technologies are available for management and t…	10.1016/j.proenv.2016.07.078	7	Generic	No	Study does not contain a credible control group	No	Solid waste
2905	Potdar, A; Singh, A; Unnnikrishnan, S; Naik, N; Naik, M; Nimkar, I	innovation in solid waste management through clean development mechanism in india and other countries	This paper focuses on the potential of Clean Development Mechanism (CDM) for Municipal Solid Waste (MSW) management in India. About 350 MSW projects are implemented through CDM across 56 countries. The maximum MSW management CDM projects are implemented in China (102) followed by Brazil (45) and Mexico (28). Fourteen countries registered two projects individually and twenty-three countries regist…	10.1016/j.psep.2015.07.009	6	Generic	No	Study does not contain a credible control group	No	Solid waste
858	Poudyal B.H., Maraseni T., Cockfield G.	impacts of forest management on tree species richness and composition: assessment of forest management regimes in tarai landscape nepal	The role of natural (non-plantation) production forests is increasingly recognized in conservation of forest biodiversity globally. Government and other forest stakeholders in Nepal are, however, still reluctant to promote active management of production forests for fear of negative impacts on forest biodiversity. Moreover, Nepal's government is converting production forests into protected areas …	10.1016/j.apgeog.2019.102078	74	Forestry	No	Document not relevant	No	No conditional payments
177	Probst B., Westermann L., Anadón L.D., Kontoleon A.	leveraging private investment to expand renewable power generation: evidence on financial additionality and productivity gains from uganda	Effectively mitigating climate change entails a quick upscaling and redirection of electricity infrastructure investment towards clean power. Given that the bulk of greenhouse gas emissions increases until 2050 will come from low- and middle-income countries, finding cost-effective ways to mitigate climate change while meeting development targets is essential. However, recent research has shown s…	10.1016/j.worlddev.2020.105347	15	Generic	No	Document not relevant	No
148	Ramirez-Reyes C., Sims K.R.E., Potapov P., Radeloff V.C.	payments for ecosystem services in mexico reduce forest fragmentation	Forest fragmentation can lead to habitat reduction, edge increase, and exposure to disturbances. A key emerging policy to protect forests is payments for ecosystem services (PES), which offers compensation to landowners for environmental stewardship. Mexico was one of the first countries to implement a broad-scale PES program, enrolling over 2.3 Mha by 2010. However, Mexico's PES did not complete…	10.1002/eap.1753	17	Forestry	Yes	NA	Yes
7439	Robalino, J; Pfaff, A; Sandoval, C; Sanchez-Azofeifa, GA	can we increase the impacts from payments for ecosystem services? impact rose over time in costa rica, yet spatial variation indicates more potential	As programs with payments for ecosystem services (PES) have become more numerous, raising the need for and also the opportunity for rigorous evidence on their contributions, we examine shifts within Costa Rica's Pagos por Servicios Ambientales (PSA) program. The PSA was heralded from its initiation, despite demonstrations of low early impacts. We study shifts in impact over time across early peri…	10.1016/j.forpol.2021.102577	76	Forestry	Yes	NA	Yes
4645	Rogger C., Beaurain F., Schmidt T.S.	composting projects under the clean development mechanism: sustainable contribution to mitigate climate change	The Clean Development Mechanism (CDM) of the Kyoto Protocol aims to reduce greenhouse gas emissions in developing countries and at the same time to assist these countries in sustainable development. While composting as a suitable mitigation option in the waste sector can clearly contribute to the former goal there are indications that high rents can also be achieved regarding the latter. In this …	10.1016/j.wasman.2010.09.007	11	RES	No	Study does not contain a credible control group	No
109	Roopsind A., Sohngen B., Brandt J.	evidence that a national redd+ program reduces tree cover loss and carbon emissions in a high forest cover, low deforestation country	Reducing emissions from deforestation and forest degradation (REDD+) is a climate change mitigation policy in which rich countries provide payments to developing countries for protecting their forests. In 2009, the countries of Norway and Guyana entered into one of the first bilateral REDD+ programs, with Norway offering to pay US$250 million to Guyana if annual deforestation rates remained below…	10.1073/pnas.1904027116	12	Forestry	Yes	NA	Yes
939	Ruggiero P.G.C., Metzger J.P., Reverberi Tambosi L., Nichols E.	payment for ecosystem services programs in the brazilian atlantic forest: effective but not enough	Payment for ecosystem services (PES) are economic incentives intended to generate conservation benefits, principally on private properties. The global portfolio of PES programs is estimated to represent an annual investment of more than USD $36 billion. Despite this substantial investment, the continued lack of systematic and rigorous impact evaluation of PES has contributed to uncertainty regard…	10.1016/j.landusepol.2018.11.054	20	Forestry	Yes	NA	Yes
2522	Sánchez-Azofeifa G.A., Pfaff A., Robalino J.A., Boomhower J.P.	costa rica's payment for environmental services program: intention, implementation, and impact	We evaluated the intention, implementation, and impact of Costa Rica's program of payments for environmental services (PSA), which was established in the late 1990s. Payments are given to private landowners who own land in forest areas in recognition of the ecosystem services their land provides. To characterize the distribution of PSA in Costa Rica, we combined remote sensing with geographic inf…	10.1111/j.1523-1739.2007.00751.x	64	Forestry	No	Study does not contain a credible control group	No	No counterfactual; double check again
2193	Sarkar A.N.	application of clean development mechanism (cdm) in renewable energy generation from micro-hydel projects of himachal pradesh	Clean Development Mechanism (CDM) is defined as one of the "flexibility" mechanisms that allows entities based in Developed Countries (Annex I Parties) to develop emission-reducing projects in Developing Countries (non-Annex I Parties), and generate tradable carbon credits corresponding to the volume of carbon emission reductions achieved by those projects. CDM projects have been developed in sev…	10.4018/978-1-5225-1671-2.ch028	5	RES	No	Study does not contain a credible control group	No
2467	Schneider, L	assessing the additionality of cdm projects: practical experiences and lessons learned	The Clean Development Mechanism (CDM) under the Kyoto Protocol allows industrialized countries to use credits from greenhouse gas (GHG) abatement projects in developing countries. A key requirement of the CDM is that the emission reductions be real, measurable and additional. This article evaluates how the additionality of CDM projects has been assessed in practice. The analysis is mainly based o…	10.3763/cpol.2008.0533	2	Generic	No	Document not relevant	No	Review
1182	Schneider, L; Kollmuss, A	perverse effects of carbon markets on hfc-23 and sf6 abatement projects in russia	Carbon markets are considered a key policy tool to achieve cost-effective climate mitigation(1,2). Project-based carbon market mechanisms allow private sector entities to earn tradable emissions reduction credits from mitigation projects. The environmental integrity of project-based mechanisms has been subject to controversial debate and extensive research(1,3-9), in particular for projects abati…	10.1038/nclimate2772	11	Generic	Yes	NA	Yes
1687	Schneider, LR	perverse incentives under the cdm: an evaluation of hfc-23 destruction projects	The clean development mechanism (CDM) under the Kyoto Protocol allows industrialized countries to use credits from greenhouse gas (GHG) abatement projects in developing countries. A key requirement of the CDM is that the emission reductions be real, measurable and additional. This article uses data from registered projects to evaluate the extent to which these objectives are met by projects that …	10.3763/cpol.2010.0096	9	Generic	Yes	NA	Yes
2275	Scullion J., Thomas C.W., Vogt K.A., Pérez-Maqueo O., Logsdon M.G.	evaluating the environmental impact of payments for ecosystem services in coatepec (mexico) using remote sensing and on-site interviews	Over the last decade, hundreds of payments for ecosystem services (PES) programmes have been initiated around the world, but evidence of their environmental benefits remains limited. In this study, two PES programmes operating in the municipality of Coatepec (Mexico) were evaluated to assess their effectiveness in protecting the region's endangered upland forests. Landsat satellite data were anal…	10.1017/s037689291100052x	23	Forestry	No	Study does not contain a credible control group	No	Merely before-and-after but no conditioning on covariates
689	Sharma B.P., Karky B.S., Nepal M., Pattanayak S.K., Sills E.O., Shyamsundar P.	making incremental progress: impacts of a redd+ pilot initiative in nepal	Reducing emissions from deforestation and forest degradation (REDD+) encompasses a range of incentives for developing countries to slow, halt and reverse forest loss and associated forest carbon emissions. Where there is high dependence on biomass energy, cleaner cooking transitions are key to REDD+'s success. Given the poor track record of efforts to promote clean cooking, more evidence is neede…	10.1088/1748-9326/aba924	65	Forestry	Yes	NA	Yes
346	Sierra R., Russman E.	on the efficiency of environmental service payments: a forest conservation assessment in the osa peninsula, costa rica	This study examined the efficiency of programs supporting the conservation of forest resources and services through direct payments to land owners; or payments for environmental services (PES). The analysis is based on a sample of farms receiving and not receiving PES in the Osa Peninsula, Costa Rica. Results indicate that payments have limited immediate effects on forest conservation in the regi…	10.1016/j.ecolecon.2005.10.010	27	Forestry	No	Study does not contain a credible control group	No	Study does not control for differences between PES and non-PES farms through matching or related approaches
1333	Sills E.O., de Sassi C., Jagger P., Lawlor K., Miteva D.A., Pattanayak S.K., Sunderlin W.D.	building the evidence base for redd+: study design and methods for evaluating the impacts of conservation interventions on local well-being	Climate change mitigation in developing countries is increasingly expected to generate co-benefits that help meet sustainable development goals. This has been an expectation and a hotly contested issue in REDD+ (reducing emissions from deforestation and forest degradation) since its inception. While the core purpose of REDD+ is to reduce carbon emissions, its legitimacy and success also depend on…	10.1016/j.gloenvcha.2017.02.002	53	Forestry	No	No effect size (or cannot be retrieved)	No	No measurement of relevant GHG
986	Simonet G., Subervie J., Ezzine-De-Blas D., Cromberg M., Duchelle A.E.	effectiveness of a redd1 project in reducing deforestation in the brazilian amazon	We estimate the early effects of the pilot project to Reduce Emissions from Deforestation and forest Degradation (REDDþ) in the Brazilian Amazon. This project offers a mix of interventions, including conditional payments, to reduce deforestation by smallholders who depend on swidden agriculture and extensive cattle ranching. We collected original data from 181 individual farmers. We use differenc…	10.1093/ajae/aay028	8	Forestry	Yes	NA	Yes
1223	Sims K.R.E., Alix-Garcia J.M.	parks versus pes: evaluating direct and incentive-based land conservation in mexico	Protected areas (PAs) and payments for ecosystem services (PES) are the top two mechanisms available for countries to achieve international REDD agreements, yet there are few empirical comparisons of their effects. We estimate the impacts of PAs and PES on forest conservation, poverty reduction, and population change at the locality level in Mexico in the 2000s. Both policies conserved forest, ge…	10.1016/j.jeem.2016.11.010	13	Forestry	Yes	NA	Yes
2695	Singh, A; Unnikrishnan, S; Naik, M; Sayanekar, S	cdm implementation towards reduction of fugitive greenhouse gas emissions	Clean Development Mechanism (CDM) is the market-based mechanism introduced to reduce greenhouse gas emissions (GHGs) during various activities. Enormous literature has been available on the GHG mitigation activities in energy, transport, agriculture, construction, waste handling activities, afforestation and reforestation sectors using CDM. However, no single study has been carried out for reduct…	10.1007/s10668-017-0058-y	8	Generic	No	Study does not contain a credible control group	No
872	Snilsveit B., Stevenson J., Langer L., Tannous N., Ravat Z., Nduku P., Polanin J., Shemilt I., Eyers J., Ferraro P.J.	incentives for climate mitigation in the land use sector—the effects of payment for environmental services on environmental and socioeconomic outcomes in low- and middle-income countries: a mixed-methods systematic review	Unsustainable practices in the land use sector contribute to climate change through the release of greenhouse gases. Payment for environmental services (PESs) provide economic incentives to reduce the negative environmental impacts of land use and are a popular approach to mitigate climate change in low- and middle-income countries. Some PES programmes also aim to improve socioeconomic outcomes a…	10.1002/cl2.1045	42	Forestry	No	Document not relevant	No	But still interesting
1112	Subak S.	forest protection and reforestation in costa rica: evaluation of a clean development mechanism prototype	Costa Rica has recently established a program that provides funds for reforestation and forest protection on private lands, partly through the sale of carbon certificates to industrialized countries. Countries purchasing these carbon offsets hope one day to receive credit against their own commitments to limit emissions of greenhouse gases. Costa Rica has used the proceeds of the sale of carbon o…	10.1007/s002670010087	16	Generic	No	Study does not contain a credible control group	No	But might still be interesting for discussion
1195	Tabor K., Jones K.W., Hewson J., Rasolohery A., Rambeloson A., Andrianjohaninarivo T., Harvey C.A.	evaluating the effectiveness of conservation and development investments in reducing deforestation and fires in ankeniheny-zahemena corridor, madagascar	Forest conservation and REDD+ projects invest millions of dollars each year to reduce local communities’ dependence on forests and prevent forest loss and degradation. However, to date, there is limited evidence on whether these investments are effective at delivering conservation outcomes. We explored the relationships between 600+ small-scale conservation and development investments that occurr…	10.1371/journal.pone.0190119	57	Forestry	No	Study does not contain a credible control group	No	No counterfactual
820	Tunç M., Pak R.	impact of the clean development mechanism on wind energy investments in turkey	Background: As carbon trading continues to be implemented on both a national and an international scale, it is becoming an important factor in renewable energy investment decisions. Turkey, with continuous growth of carbon dioxide emission and energy consumption since 2001, ratified the Kyoto Protocol in 2009 and began registration of projects with greenhouse gas reductions in 2010. In light of t…	10.1186/2192-0567-2-20	14	Generic	No	Study does not contain a credible control group	No	No counterfactual
1455	Van Brunt M., Kantor B., Johnson N.	generating and selling carbon offset credits	New energy from waste capacity is eligible to generate carbon offsets based on a Clean Development Mechanism offset methodology through the Verified Carbon Standard (VCS). To date, two facilities in North America have progressed through the carbon offset generation process, successfully validating and verifying their projects in accordance with the standard. The Lee County facility began generati…	10.1115/nawtec20-7048	1	Industry	No	Study does not contain a credible control group	No	No counterfactualInteresting case of undercrediting,
1682	von Avenarius A., Devaraja T.S., Kiesel R.	an empirical comparison of carbon credit projects under the clean development mechanism and verified carbon standard	Carbon credit projects generate carbon credits by abating greenhouse gas emissions. Carbon credits can then be traded on carbon markets or immobilized in order to compensate for caused emissions. The Clean Development Mechanism (CDM) and Verified Carbon Standard (VCS), as the two most important carbon credit mechanisms, are investigated and compared regarding the success of projects. We define su…	10.3390/cli6020049	7	RES	No	Study does not contain a credible control group	No	Still interesting
121	Von Thaden J., Manson R.H., Congalton R.G., López-Barrera F., Salcone J.	a regional evaluation of the effectiveness of mexico’s payments for hydrological services	Recent criticisms of, and financial limits on, payment for hydrologic services (PHS) programs suggest that rigorous, spatially explicit evaluations are urgently needed to improve their effectiveness in conserving forest cover and to justify payments. To evaluate the effectiveness of Mexico’s PHS programs in the Pixquiac and Gavilanes subwatersheds in central Veracruz state, we used a grid-based a…	10.1007/s10113-019-01518-3	78	Forestry	Yes	NA	Yes
516	Ward P.S., Mapemba L., Bell A.R.	smart subsidies for sustainable soils: evidence from a randomized controlled trial in southern malawi	Conventional agricultural practices – especially conventional tillage – are a major driver of soil erosion globally. While soil may not frequently considered a vulnerable natural resource, the erosion and degradation of soils poses a serious threat to food production and the production of numerous otherin situ andex situ ecosystem services. This study provides some of the first evidence on the ef…	10.1016/j.jeem.2021.102556	80	Forestry	No	Study does not contain a credible control group	No	Conservation agriculture, might qualify as IFM, but unclear
6918	Ward, EB; Doroski, DA; Felson, AJ; Hallett, RA; Oldfield, EE; Kuebbing, SE; Bradford, MA	positive long-term impacts of restoration on soils in an experimental urban forest	As urbanization increases worldwide, investments in nature-based solutions that aim to mitigate urban stressors and counter the impacts of global climate change are also on the rise. Tree planting on degraded urban lands-or afforestation-is one form of nature-based solution that has been increasingly implemented in cities around the world. The benefits of afforestation are, however, contingent on…	10.1002/eap.2336	14	Forestry	No	Study does not contain a credible control group	No	No counterfactual
6779	Wei, XH; Li, QL; Liu, YQ; Liu, SR; Guo, XM; Zhang, L; Niu, DK; Zhang, WY	restoring ecosystem carbon sequestration through afforestation: a sub-tropic restoration case study	The long-term Forest Restoration Experimental Project (FREP) was established in 1991 on a sub-tropical, barren, degraded, red soil with a rolling terrain located in Taihe County, Jianxi province, China. The objective of the FREP was to evaluate the effects of restoration, through afforestation of various local climax species, on ecological functions to provide guidance for future restoration proj…	10.1016/j.foreco.2012.06.018	15	Forestry	No	Document not relevant	No	Does not evaluate the impact of a subsidy
1316	Wentzel M., Pouris A.	the development impact of solar cookers: a review of solar cooking impact research in south africa	Solar cooking is often considered "a solution looking for a problem". Solar cookers have long been presented as an interesting solution to the world's problem of dwindling fuel wood sources and other environmental problems associated with wood fuel demand for cooking. However, recent GTZ field work in South Africa showed different benefits instead: the use of solar cookers resulted in appreciable…	10.1016/j.enpol.2006.06.002	12	cookstoves	No	Document not relevant	No	Review
701	West T.A.P., Börner J., Sills E.O., Kontoleon A.	overstated carbon emission reductions from voluntary redd+ projects in the brazilian amazon	Reducing emissions from deforestation and forest degradation (REDD+) has gained international attention over the past decade, as manifested in both United Nations policy discussions and hundreds of voluntary projects launched to earn carbon-offset credits. There are ongoing discussions about whether and how projects should be integrated into national climate change mitigation efforts under the Pa…	10.1073/pnas.2004334117	2	Forestry	Yes	NA	Yes
950	Wiik E., D’annunzio R., Pynegar E., Crespo D., Asquith N., Jones J.P.G.	experimental evaluation of the impact of a payment for environmental services program on deforestation	Despite calls for greater use of randomized control trials (RCTs) to evaluate the impact of conservation interventions; such experimental evaluations remain extremely rare. Payments for environmental services (PES) are widely used to slow tropical deforestation but there is widespread recognition of the need for better evidence of effectiveness. A Bolivian nongovernmental organization took the un…	10.1111/csp2.8	46	Forestry	No	No effect size (or cannot be retrieved)	No	Do not report effect sizes
700	Wiik E., Jones J.P.G., Pynegar E., Bottazzi P., Asquith N., Gibbons J., Kontoleon A.	mechanisms and impacts of an incentive-based conservation program with evidence from a randomized control trial	Conservation science needs more high-quality impact evaluations, especially ones that explore mechanisms of success or failure. Randomized control trials (RCTs) provide particularly robust evidence of the effectiveness of interventions (although they have been criticized as reductionist and unable to provide insights into mechanisms), but there have been few such experiments investigating conserv…	10.1111/cobi.13508	48	Forestry	No	Study does not contain a credible control group	No	Survey data
11265	Wu Y.-B., Xu B., Feng H., Yang X.-L., Kang X.-Q.	n2o abatement process and techno-economic analysis in nitric acid unit	Greenhouse gas N2O may be generated in nitric acid production process, due to the side reaction of ammonia oxidation. The N2O emission reduction technology for nitric acid unit and the Clean Development Mechanism (CDM) monitoring methodology were introduced. The real-time monitoring system of process parameters and data acquisition system for supporting the calculation of N2O emission reduction c…	NA	10	Industry	No	No effect size (or cannot be retrieved)	No	Full text not retrievable
680	Wunder S., Börner J., Ezzine-De-Blas D., Feder S., Pagiola S.	payments for environmental services: past performance and pending potentials	We develop a theory of change for payments for environmental services (PES) to review their imminent strengths and weaknesses in light of a growing body of impact evaluation studies. We show that PES are probably at least as environmentally additional as other conservation tools, based on the limited evidence. The original vision of PES as being direct, flexible, and potentially effective remains…	10.1146/annurev-resource-100518-094206	82	Forestry	No	Review	No	Good to discuss limitations, written by Wunder et al
11586	Yang W.-H., Zhao S.-N., Wang K.-H., Li W., Ma J.-Y.	greenhouse effect reduction in biomass power plant: a case study	Biomass power plants are among the renewable energy sources to which China is committed. These projects will reduce the greenhouse effect from biomass caused by natural decay and uncontrolled burning, and also will reduce greenhouse effect related to the burning of fossil fuel for power production. A case study of straw power generation project in Xiajin country, Shandong province of China is dis…	10.1109/icbbe.2009.5162893	10	RES	No	Study does not contain a credible control group	No
1976	Yang W., Liu W., Viña A., Luo J., He G., Ouyang Z., Zhang H., Liu J.	performance and prospects of payments for ecosystem services programs: evidence from china	Systematic evaluation of the environmental and socioeconomic effects of Payments for Ecosystem Services (PES) programs is crucial for guiding policy design and implementation. We evaluated the performance of the Natural Forest Conservation Program (NFCP), a national PES program of China, in the Wolong Nature Reserve for giant pandas. The environmental effects of the NFCP were evaluated through a …	10.1016/j.jenvman.2013.04.019	41	Forestry	No	Study does not contain a credible control group	No
3372	Yang, WH; Zhao, SN; Wang, KH; Li, W; Ma, JY	greenhouse effect reduction in biomass power plant: a case study	Biomass power plants are among the renewable energy sources to which China is committed. These projects will reduce the greenhouse effect from biomass caused by natural decay and uncontrolled burning, and also will reduce greenhouse effect related to the burning of fossil fuel for power production. A case study of straw power generation project in Xiajin country, Shandong province of China is dis…	NA	17	Generic	No	Study does not contain a credible control group	No
449	Zhou T., Shen W., Qiu X., Chang H., Yang H., Yang W.	impact evaluation of a payments for ecosystem services program on vegetation quantity and quality restoration in inner mongolia	Globally, the payments for ecosystem services (PES) program has become a helpful tool that serves the purpose of mitigating ecosystem degradation and protecting ecosystem services. However, the ecological effects of existing PES programs based on counterfactual baselines, quantification and sophisticated statistical analyses are still poorly understood. Taking Inner Mongolia as an example, this s…	10.1016/j.jenvman.2021.114113	73	Forestry	Yes	NA	Yes
NA	He, G., Morse, R.	Addressing carbon Offsetters’ Paradox: Lessons from Chinese wind CDM	The clean development mechanism (CDM) has been a leading international carbon market and a driving force for sustainable development. But the eruption of controversy over offsets from Chinese wind power in 2009 exposed cracks at the core of how carbon credits are verified in the developing economies. The Chinese wind controversy therefore has direct implications for the design and negotiation of …	10.1016/j.enpol.2013.09.021	NA	RES	No	Study does not contain a credible control group	No
NA	Haya B.	Carbon Offsetting: An Efficient Way to Reduce Emissions or to Avoid Reducing Emissions? An Investigation and Analysis of Offsetting Design and Practice in India and China	Carbon trading is being implemented on international, national and sub-national scales in most places where greenhouse gas (GHG) emissions targets are enacted. The appeal of carbon trading is efficiency, lowering the cost of climate mitigation by allowing the market to find the least expensive sources of reduction. In this dissertation I probe the assumptions that carbon trading is efficient and …	NA	NA	RES	No	Study does not contain a credible control group	No	Studies provide rich detail on case studies, but no additionality estimates using experimental or rigorous observational studies (e.g., diff-in-diff and matching)
229	Haya B., Cullenward D., Strong A.L., Grubert E., Heilmayr R., Sivas D.A., Wara M.	managing uncertainty in carbon offsets: insights from california’s standardized approach	Carbon offsets allow greenhouse gas emitters to comply with an emissions cap by paying others outside of the capped sectors to reduce emissions. The first major carbon offset programme, the United Nations’ Clean Development Mechanism (CDM), has been criticized for generating a large number of credits from projects that do not actually reduce emissions. Following the controversial CDM experience, …	10.1080/14693062.2020.1781035	67	Generic	No	Study does not contain a credible control group	No
NA	Wara, M.	Measuring the Clean Development Mechanism's Performance and Potential	The Clean Development Mechanism (CDM) of the Kyoto Protocol is the first global attempt to address a global environmental public goods problem with a market-based mechanism. The CDM is a carbon credit market where sellers, located exclusively in developing countries, can generate and certify emissions reductions that can be sold to buyers located in developed countries. Since 2004 it has grown ra…	NA	NA	Generic	No	Study does not contain a credible control group	No	Review
NA	Erickson, P., Lazarus, M., Spalding-Fecher, R.	Net climate change mitigation of the Clean Development Mechanism	The Clean Development Mechanism (CDM) has allowed industrialized countries to buy credits from developing countries for the purpose of meeting targets under the Kyoto Protocol. In principle, the CDM simply shifts the location of emission reductions, with no net mitigation impact. Departing from this zero-sum calculus, the Cancun Agreements reached at the sixteenth session of the Conference of the…	NA	NA	Generic	No	Study does not contain a credible control group	No	Scenario Analysis
NA	Anderson, C., Field, C., Mach, K.	Forest offsets partner climate-change mitigation with conservation	Are forest offsets an effective way to address climate change, and do they provide other benefits? In some climate-change mitigation policies, industries and individuals can purchase offsets that compensate for their greenhouse-gas emissions by reducing emissions elsewhere. However, offsets may undermine mitigation efforts, by potentially giving carbon credits for emissions reductions that would …	NA	NA	Forestry	No	Study does not contain a credible control group	No
1000001	Robalino et al	Evaluating Interactions of Forest Conservation Policies on Avoided Deforestation	We estimate the effects on deforestation that have resulted from policy interactions between parks and payments and between park buffers and payments in Costa Rica between 2000 and 2005. We show that the characteristics of the areas where protected and unprotected lands are located differ significantly. Additionally, we find that land characteristics of each of the policies and of the places wher…	doi.org/10.1371/journal.pone.0124910	NA	Forestry	Yes	NA	Yes	Not in original sample
1000002	Linkie M., Smith, R., Zhu Y., Martyr, D., et al	Evaluating Biodiversity Conservation around a Large Sumatran Protected Area	Many of the large, donor-funded community-based conservation projects that seek to reduce bio- diversity loss in the tropics have been unsuccessful. There is, therefore, a need for empirical evaluations to identify the driving factors and to provide evidence that supports the development of context-specific conser- vation projects. We used a quantitative approach to measure, post hoc, the effecti…	10.1111/j.1523-1739.2008.00906.x	NA	Forestry	Yes	NA	Yes	Not in original sample
1000003	Chan and Huenteler	Financing Wind Energy Deployment in China through the Clean Development Mechanism	NA	NA	NA	Renewable Energy	Yes	NA	Yes	Not in original sample
1000004	Calel et al	Do Carbon Offsets Offset Carbon?	NA	NA	NA	Renewable Energy	Yes	NA	Yes	Not in original sample
1000005	Gillenwater et al	Additionality of wind energy investments in the U.S. voluntary green power market	NA	NA	NA	Renewable Energy	Yes	NA	Yes	Not in original sample
1000007	Bensch G., Peters J.	The intensive margin of technology adoption – Experimental evidence on improved cooking stoves in rural Senegal	Today, almost 3 billion people in developing countries rely on biomass as primary cooking fuel, with profound negative implications for their well-being. Improved biomass cooking stoves are alleged to counteract these adverse effects. This paper evaluates take-up and impacts of low-cost improved stoves through a randomized controlled trial. The randomized stove is primarily designed to curb firew…	10.1016/j.jhealeco.2015.03.006	NA	Household	Yes	NA	Yes	Not in original sample
1000008	West et al.	Carbon credits from tropical forest conservation projects unlikely to mitigate climate change	Carbon-offset credits traded on voluntary carbon markets largely originate from REDD+ (Reduced Emissions from Deforestation and forest Degradation) projects across the tropics claiming “reductions in forest loss” vis-à-vis baselines established ex-ante. However, these are typically not subjected to counterfactual-based evaluation. We present an ex-post evaluation of the deforestation impacts of 2…	NA	NA	Forestry	Yes	NA	Yes	Not in original sample
2586	Badgley G., Freeman J., Hamman J.J., Haya B., Trugman A.T., Anderegg W.R.L., Cullenward D.	systematic over-crediting in california's forest carbon offsets program	Carbon offsets are widely used by individuals, corporations, and governments to mitigate their greenhouse gas emissions on the assumption that offsets reflect equivalent climate benefits achieved elsewhere. These climate-equivalence claims depend on offsets providing real and additional climate benefits beyond what would have happened, counterfactually, without the offsets project. Here, we evalu…	10.1111/gcb.15943		Forestry	Yes	NA	Yes	Not in original sample
NA	Berkouwer, S., Dean, J.	Credit and attention in the adoption of profitable energy efficient technologies in Kenya	We study an energy efficient charcoal cookstove in an experiment with 1,000 households in Nairobi. We estimate a 39 percent reduc- tion in charcoal spending, which matches engineering estimates, generating a 295 percent annual return. Despite fuel savings of $237 over the stove’s two-year lifespan—and $295 in emissions reduc- tions—households are only willing to pay $12. Drawing attention to ener…	10.1257/aer.20210766	NA	Cookstoves	Yes	NA	Yes	Not in original sample
NA	Guizar-Coutiño A. et al	Aglobal evaluation of the effectiveness of voluntary REDD+ projects at reducing deforestation and degradation in the moist tropics	Reducing emissions from deforestation and forest degradation (REDD+) projects aim to contribute to climate change mitigation by protecting and enhancing carbon stocks in tropical forests, but there have been no systematic global evaluations of their impact. We used a new data set for tropical humid forests and a standardized evaluation approach (based on pixel matching) to quantify the performanc…	10.1111/cobi.13970	NA	Forestry	Yes	NA	Yes	Not in original sample
NA	Coffield et al	Using remote sensing to quantify the additional climate benefits of California forest carbon offset projects	Nature-based climate solutions are a vital component of many climate mitigation strategies, including California's, which aims to achieve carbon neutrality by 2045. Most carbon offsets in California's cap-and- trade program come from improved forest management (IFM) projects. Since 2012, various landowners have set up IFM projects following the California Air Resources Board's IFM protocol. As ma…	10.1111/gcb.16380	NA	Forestry	Yes	NA	Yes	Not in original sample

## Sheet: Included_studies
ID	Authors	Title	Abstract	DOI	Publ_year	Region	Country	Sector	Sub_sector	Start_year	Baseline_year	Intervention_month	Post_intervention_month	Total_study_month	Total_sample	Treatment_sample	Control_sample	Generic_study_design	Detailed_study_design	Dependent_variable	Statistical_method	Page_effect	Coefficient_r	Coefficient_sd	Standardized_effect	Cohens_d	Mean_treatment	Mean_control	Mean_difference	P_value	Baseline_emissions_consumptions	Post_intervention_emissions	Percentage_change	Percentage_change_w_correction	Correction_factor	Coefficient_sd_type	Effect_direction	Central estimate type	Uncertainty quantification	Post-intervention permanence	Co-benefits	Co_benefits_assessment	Leakage_investigated	Leakage_assessment	Number control variables	Offsets_issued	Additionality_estimate	Additionality_estimate_type	Number_offset projects_evaluated
0	Carrilho C.D., Demarchi G., Duchelle A.E., Wunder S., Morsello C.	permanence of avoided deforestation in a transamazon redd+ project (pará, brazil)	Rigorous impact evaluations of local REDD+ (reduced emissions from deforestation and forest degradation) initiatives have shown some positive outcomes for forests, while well-being impacts have been mixed. However, will REDD+ outcomes persist over time after interventions have ended? Using quasi-experimental methods, we investigated the effects of one REDD+ project in the Brazilian Amazon on defo…	10.1016/j.ecolecon.2022.107568	2022	Latin America	Brazil	Forestry	REDD+	2012	2010	60	24	108	92	52	40	Rigorous observational study	Difference-in-difference + matching	Forest cover change between 2010 and 2014 (share of of land area) in percentage points	DID-matching estimators	7	7.8	4.36	Yes	0.269701	NA	NA	NA	NA	NA	NA	-0.52	-0.52	1	Standard errors	1	Central estimate	Point estimate with uncertainty	Yes	Yes	Positive	Yes	No evidence of leakage	7	No	NA	NA	NA
0	Carrilho C.D., Demarchi G., Duchelle A.E., Wunder S., Morsello C.	permanence of avoided deforestation in a transamazon redd+ project (pará, brazil)	Rigorous impact evaluations of local REDD+ (reduced emissions from deforestation and forest degradation) initiatives have shown some positive outcomes for forests, while well-being impacts have been mixed. However, will REDD+ outcomes persist over time after interventions have ended? Using quasi-experimental methods, we investigated the effects of one REDD+ project in the Brazilian Amazon on defo…	10.1016/j.ecolecon.2022.107569	2022	Latin America	Brazil	Forestry	REDD+	2012	2010	60	24	108	92	52	40	Rigorous observational study	Difference-in-difference + matching	Forest cover change between 2010 and 2014 (share of of land area) in percentage points	DID-matching estimators	7	8.08	4.57	Yes	0.266544	NA	NA	NA	NA	NA	NA	-0.538667	-0.538667	1	Standard errors	1	Central estimate	Point estimate with uncertainty	Yes	Yes	Positive	Yes	No evidence of leakage	7	No	NA	NA	NA
0	Carrilho C.D., Demarchi G., Duchelle A.E., Wunder S., Morsello C.	permanence of avoided deforestation in a transamazon redd+ project (pará, brazil)	Rigorous impact evaluations of local REDD+ (reduced emissions from deforestation and forest degradation) initiatives have shown some positive outcomes for forests, while well-being impacts have been mixed. However, will REDD+ outcomes persist over time after interventions have ended? Using quasi-experimental methods, we investigated the effects of one REDD+ project in the Brazilian Amazon on defo…	10.1016/j.ecolecon.2022.107570	2022	Latin America	Brazil	Forestry	REDD+	2012	2010	60	24	108	92	52	40	Rigorous observational study	Difference-in-difference + matching	Forest cover change between 2010 and 2014 (share of of land area) in percentage points	DID-matching estimators	7	10.32	4	Yes	0.38895	NA	NA	NA	NA	NA	NA	-0.688	-0.688	1	Standard errors	1	Central estimate	Point estimate with uncertainty	Yes	Yes	Positive	Yes	No evidence of leakage	7	No	NA	NA	NA
986	Simonet G., Subervie J., Ezzine-De-Blas D., Cromberg M., Duchelle A.E.	effectiveness of a redd1 project in reducing deforestation in the brazilian amazon	We estimate the early effects of the pilot project to Reduce Emissions from Deforestation and forest Degradation (REDDþ) in the Brazilian Amazon. This project offers a mix of interventions, including conditional payments, to reduce deforestation by smallholders who depend on swidden agriculture and extensive cattle ranching. We collected original data from 181 individual farmers. We use differenc…	10.1093/ajae/aay028	2018	Latin America	Brazil	Forestry	REDD+	2010	2008	48	NA	72	127	52	75	Rigorous observational study	Difference-in-difference + matching	Forest cover in 2014 (share of land area)	DID-matching estimators	222	7.1	3.21	Yes	0.401453	NA	NA	NA	NA	NA	NA	-0.55	-0.55	1	Standard errors	1	Central estimate	Point estimate with uncertainty	No	No	NA	Yes	No evidence of leakage	0	No	NA	NA	NA
986	Simonet G., Subervie J., Ezzine-De-Blas D., Cromberg M., Duchelle A.E.	effectiveness of a redd1 project in reducing deforestation in the brazilian amazon	We estimate the early effects of the pilot project to Reduce Emissions from Deforestation and forest Degradation (REDDþ) in the Brazilian Amazon. This project offers a mix of interventions, including conditional payments, to reduce deforestation by smallholders who depend on swidden agriculture and extensive cattle ranching. We collected original data from 181 individual farmers. We use differenc…	10.1093/ajae/aay029	2018	Latin America	Brazil	Forestry	REDD+	2010	2008	48	NA	72	127	52	75	Rigorous observational study	Difference-in-difference + matching	Forest cover in 2014 (share of land area)	DID-matching estimators	222	10.66	4.99	Yes	0.382421	NA	NA	NA	NA	NA	NA	-0.55	-0.55	1	Standard errors	1	Central estimate	Point estimate with uncertainty	No	No	NA	Yes	No evidence of leakage	0	No	NA	NA	NA
986	Simonet G., Subervie J., Ezzine-De-Blas D., Cromberg M., Duchelle A.E.	effectiveness of a redd1 project in reducing deforestation in the brazilian amazon	We estimate the early effects of the pilot project to Reduce Emissions from Deforestation and forest Degradation (REDDþ) in the Brazilian Amazon. This project offers a mix of interventions, including conditional payments, to reduce deforestation by smallholders who depend on swidden agriculture and extensive cattle ranching. We collected original data from 181 individual farmers. We use differenc…	10.1093/ajae/aay030	2018	Latin America	Brazil	Forestry	REDD+	2010	2008	48	NA	72	127	52	75	Rigorous observational study	Difference-in-difference + matching	Forest cover in 2014 (share of land area)	DID-matching estimators	222	7.98	4.52	Yes	0.322965	NA	NA	NA	NA	NA	NA	-0.55	-0.55	1	Standard errors	1	Central estimate	Point estimate with uncertainty	No	No	NA	Yes	No evidence of leakage	0	No	NA	NA	NA
986	Simonet G., Subervie J., Ezzine-De-Blas D., Cromberg M., Duchelle A.E.	effectiveness of a redd1 project in reducing deforestation in the brazilian amazon	We estimate the early effects of the pilot project to Reduce Emissions from Deforestation and forest Degradation (REDDþ) in the Brazilian Amazon. This project offers a mix of interventions, including conditional payments, to reduce deforestation by smallholders who depend on swidden agriculture and extensive cattle ranching. We collected original data from 181 individual farmers. We use differenc…	10.1093/ajae/aay031	2018	Latin America	Brazil	Forestry	REDD+	2010	2008	48	NA	72	127	52	75	Rigorous observational study	Difference-in-difference + matching	Forest cover in 2014 (share of land area)	DID-matching estimators	222	8.61	4.16	Yes	0.374766	NA	NA	NA	NA	NA	NA	-0.55	-0.55	1	Standard errors	1	Central estimate	Point estimate with uncertainty	No	No	NA	Yes	No evidence of leakage	0	No	NA	NA	NA
986	Simonet G., Subervie J., Ezzine-De-Blas D., Cromberg M., Duchelle A.E.	effectiveness of a redd1 project in reducing deforestation in the brazilian amazon	We estimate the early effects of the pilot project to Reduce Emissions from Deforestation and forest Degradation (REDDþ) in the Brazilian Amazon. This project offers a mix of interventions, including conditional payments, to reduce deforestation by smallholders who depend on swidden agriculture and extensive cattle ranching. We collected original data from 181 individual farmers. We use differenc…	10.1093/ajae/aay031	2018	Latin America	Brazil	Forestry	REDD+	2010	2008	48	NA	72	127	52	75	Rigorous observational study	Difference-in-difference + matching	Forest cover in 2014 (share of land area)	DID-matching estimators	222	7.38	4.49	Yes	0.297774	NA	NA	NA	NA	NA	NA	-0.55	-0.55	1	Standard errors	1	Central estimate	Point estimate with uncertainty	No	No	NA	Yes	No evidence of leakage	0	No	NA	NA	NA
121	Von Thaden J., Manson R.H., Congalton R.G., L√≥pez-Barrera F., Salcone J.	a regional evaluation of the effectiveness of mexico‚Äôs payments for hydrological services	Recent criticisms of, and financial limits on, payment for hydrologic services (PHS) programs suggest that rigorous, spatially explicit evaluations are urgently needed to improve their effectiveness in conserving forest cover and to justify payments. To evaluate the effectiveness of Mexico‚Äôs PHS programs in the Pixquiac and Gavilanes subwatersheds in central Veracruz state, we used a grid-based…	10.1007/s10113-019-01518-3	2019	Latin America	Mexico	Forestry	REDD+	2003	1973	120	132	132	458	185	273	Rigorous observational study	Difference in-means + matching	Forest cover in 2014 (share of land area)	Difference in means	1759	NA	NA	Yes	0.354156	0.76	6.29	-5.53	0.0001	-0.0629	-0.0076	-0.879173	-0.879173	1	NA	-1	Central estimate	Point estimate with uncertainty	No	Yes	Positive	Yes	No evidence of leakage	0	No	NA	NA	NA
185	Jayachandran S., De Laat J., Lambin E.F., Stanton C.Y., Audy R., Thomas N.E.	cash for carbon: a randomized trial of payments for ecosystem services to reduce deforestation	We evaluated a program of payments for ecosystem services in Uganda that offered forestowning households annual payments of 70,000 Ugandan shillings per hectare if they conserved their forest. The program was implemented as a randomized controlled trial in 121 villages, 60 of which received the program for 2 years. The primary outcome was the change in land area covered by trees, measured by clas…	10.1126/science.aan0568	2017	Africa	Uganda	Forestry	REDD+	2011	NA	24	NA	24	121	60	61	Experimental study	Randomised Controlled Trial	Forest cover (ha)	OLS	4	5.549	2.888	Yes	0.397393	NA	NA	NA	NA	9.1	4.2	-0.538462	-0.538462	1	Heteroskedasticity-robust standard errors	1	Central estimate	Point estimate with uncertainty	No	Yes	Neutral	Yes	No evidence of leakage	5	No	NA	NA	NA
185	Jayachandran S., De Laat J., Lambin E.F., Stanton C.Y., Audy R., Thomas N.E.	cash for carbon: a randomized trial of payments for ecosystem services to reduce deforestation	We evaluated a program of payments for ecosystem services in Uganda that offered forestowning households annual payments of 70,000 Ugandan shillings per hectare if they conserved their forest. The program was implemented as a randomized controlled trial in 121 villages, 60 of which received the program for 2 years. The primary outcome was the change in land area covered by trees, measured by clas…	10.1126/science.aan0568	2017	Africa	Uganda	Forestry	REDD+	2011	NA	24	NA	24	1099	564	535	Experimental study	Randomised Controlled Trial	Forest cover (ha)	OLS	4	5.549	2.888	Yes	0.160191	NA	NA	NA	NA	9.1	4.2	-0.538462	-0.538462	1	Heteroskedasticity-robust standard errors	1	Central estimate	Point estimate with uncertainty	No	Yes	Neutral	Yes	No evidence of leakage	5	No	NA	NA	NA
842	Montoya-Zumaeta J., Rojas E., Wunder S.	adding rewards to regulation: the impacts of watershed conservation on land cover and household wellbeing in moyobamba, peru	We estimate the effects of Peru‚Äôs oldest watershed payments for environmental services (PES) initiative in Moyobamba (Andes‚ÄìAmazon transition zone) and disentangle the complex intervention into its two main forest conservation treatments. First, a state-managed protected area (PA) was established, allowing sustainable use but drastically limiting de facto land use and land rights of household…	10.1371/journal.pone.0225367	2019	Latin America	Peru	Forestry	REDD+	2010	NA	72	NA	72	311	82	229	Rigorous observational study	Linear regressions + matching	Change in forest cover (h/plot)	OLS	11	0.134	0.056	Yes	0.275387	NA	NA	NA	NA	NA	NA	NA	NA	NA	Standard errors	1	Central estimate	Point estimate with uncertainty	No	Yes	Mixed	No	NA	8	No	NA	NA	NA
842	Montoya-Zumaeta J., Rojas E., Wunder S.	adding rewards to regulation: the impacts of watershed conservation on land cover and household wellbeing in moyobamba, peru	We estimate the effects of Peru‚Äôs oldest watershed payments for environmental services (PES) initiative in Moyobamba (Andes‚ÄìAmazon transition zone) and disentangle the complex intervention into its two main forest conservation treatments. First, a state-managed protected area (PA) was established, allowing sustainable use but drastically limiting de facto land use and land rights of household…	10.1371/journal.pone.0225367	2019	Latin America	Peru	Forestry	REDD+	2010	NA	72	NA	72	311	82	229	Rigorous observational study	Linear regressions + matching	Change in forest cover (h/plot)	OLS	11	0.204	0.0682	Yes	0.344249	NA	NA	NA	NA	NA	NA	NA	NA	NA	Standard errors	1	Central estimate	Point estimate with uncertainty	No	Yes	Mixed	No	NA	8	No	NA	NA	NA
842	Montoya-Zumaeta J., Rojas E., Wunder S.	adding rewards to regulation: the impacts of watershed conservation on land cover and household wellbeing in moyobamba, peru	We estimate the effects of Peru‚Äôs oldest watershed payments for environmental services (PES) initiative in Moyobamba (Andes‚ÄìAmazon transition zone) and disentangle the complex intervention into its two main forest conservation treatments. First, a state-managed protected area (PA) was established, allowing sustainable use but drastically limiting de facto land use and land rights of household…	10.1371/journal.pone.0225367	2019	Latin America	Peru	Forestry	REDD+	2010	NA	72	NA	72	311	82	229	Rigorous observational study	Linear regressions + matching	Change in forest cover (h/plot)	OLS	11	0.199	0.0675	Yes	0.339294	NA	NA	NA	NA	NA	NA	NA	NA	NA	Standard errors	1	Central estimate	Point estimate with uncertainty	No	Yes	Mixed	No	NA	8	No	NA	NA	NA
7475	Le Velly, G; Sauquet, A; Cortina-Villar, S	pes impact and leakages over several cohorts: the case of the psa-h in yucatan, mexico	We assess the impact of the PSA-H, a payment for environmental services scheme implemented in Mexico over the 2005-2012 period. By studying several cohorts of program beneficiaries we are able to shed light on the permanence of the program's impact. Based on the exploitation of 2.5 to 20 in resolution SPOT images and ejido surveys carried out in 76 ejidos located in the Cono Sur of Yucatan, we fi…	10.3368/le.93.2.230	2017	Latin America	Mexico	Forestry	REDD+	2005	NA	84	NA	84	7331	NA	NA	Rigorous observational study	Linear regressions + matching	Percentager of forest cover loss from 2005-2012	OLS	22	0.0477	0.0078	Yes	0.142964	NA	NA	NA	NA	NA	NA	NA	-0.0245	1	Clustered standard errors	-1	Central estimate	Point estimate with uncertainty	No	Yes	NA	Yes	No evidence of leakage	11	No	NA	NA	NA
7475	Le Velly, G; Sauquet, A; Cortina-Villar, S	pes impact and leakages over several cohorts: the case of the psa-h in yucatan, mexico	We assess the impact of the PSA-H, a payment for environmental services scheme implemented in Mexico over the 2005-2012 period. By studying several cohorts of program beneficiaries we are able to shed light on the permanence of the program's impact. Based on the exploitation of 2.5 to 20 in resolution SPOT images and ejido surveys carried out in 76 ejidos located in the Cono Sur of Yucatan, we fi…	10.3368/le.93.2.231	2018	Latin America	Mexico	Forestry	REDD+	2005	NA	84	NA	84	10352	NA	NA	Rigorous observational study	Linear regressions + matching	Percentager of forest cover loss from 2005-2012	OLS	35	0.0453	0.0026	Yes	0.342668	NA	NA	NA	NA	NA	NA	NA	-0.0245	1	Clustered standard errors	-1	Central estimate	Point estimate with uncertainty	No	Yes	NA	Yes	No evidence of leakage	10	No	NA	NA	NA
173	Mohebalian P.M., Aguilar F.X.	design of tropical forest conservation contracts considering risk of deforestation	Payments for Forest Conservation (PFC) programs financially compensate forest owners to maintain and increase the provision of ecosystem services. Nonetheless, their effectiveness and additionality in preventing deforestation and degradation remain contested. The design of PFC contracts can influence landowner participation and in-turn a program's prospects for additionality. We examined preferen…	10.1016/j.landusepol.2017.11.008	2018	Latin America	Ecuador	Forestry	REDD+	2008	NA	72	NA	72	536	268	268	Rigorous observational study	t-test + matching	Deforestation (defined as equal to 1 if deforested from 2008 to 2013 or 0 if otherwise)	Difference in means	69	NA	NA	Yes	0.302548	NA	NA	NA	NA	NA	NA	NA	-0.09	1	NA	1	Central estimate	Point estimate with uncertainty	No	No	NA	Yes	Negative	NA	No	NA	NA	NA
1339	Jones K.W., Holland M.B., Naughton-Treves L., Morales M., Suarez L., Keenan K.	forest conservation incentives and deforestation in the ecuadorian amazon	Forest conservation incentives are a popular approach to combatting tropical deforestation. Here we consider a case where direct economic incentives for forest conservation were offered to newly titled smallholders in a buffer zone of a protected area in the northeastern Ecuadorian Amazon. We used quasi-experimental impact evaluation methods to estimate changes in forest cover for 63 smallholders…	10.1017/s0376892916000308	2017	Latin America	Ecuador	Forestry	REDD+	2011	2004	24	NA	108	784	NA	NA	Rigorous observational study	Fixed effects + matched	Change in deforestation (%)	Fixed effects	60	-0.42	0.14	Yes	0.215249	NA	NA	NA	NA	NA	NA	NA	-0.76	1	Standard deviation	-1	Central estimate	Point estimate with uncertainty	No	No	NA	No	NA	6	No	NA	NA	NA
1339	Jones K.W., Holland M.B., Naughton-Treves L., Morales M., Suarez L., Keenan K.	forest conservation incentives and deforestation in the ecuadorian amazon	Forest conservation incentives are a popular approach to combatting tropical deforestation. Here we consider a case where direct economic incentives for forest conservation were offered to newly titled smallholders in a buffer zone of a protected area in the northeastern Ecuadorian Amazon. We used quasi-experimental impact evaluation methods to estimate changes in forest cover for 63 smallholders…	10.1017/s0376892916000308	2017	Latin America	Ecuador	Forestry	REDD+	2011	2004	24	NA	108	684	NA	NA	Rigorous observational study	Fixed effects + matched	Change in deforestation (%)	Fixed effects	60	-0.45	0.17	Yes	0.203469	NA	NA	NA	NA	NA	NA	NA	-0.73	1	Standard deviation	-1	Central estimate	Point estimate with uncertainty	No	No	NA	No	NA	6	No	NA	NA	NA
1339	Jones K.W., Holland M.B., Naughton-Treves L., Morales M., Suarez L., Keenan K.	forest conservation incentives and deforestation in the ecuadorian amazon	Forest conservation incentives are a popular approach to combatting tropical deforestation. Here we consider a case where direct economic incentives for forest conservation were offered to newly titled smallholders in a buffer zone of a protected area in the northeastern Ecuadorian Amazon. We used quasi-experimental impact evaluation methods to estimate changes in forest cover for 63 smallholders…	10.1017/s0376892916000308	2017	Latin America	Ecuador	Forestry	REDD+	2011	2004	24	NA	108	570	NA	NA	Rigorous observational study	Fixed effects + matched	Change in deforestation (%)	Fixed effects	60	-0.45	0.2	Yes	0.189652	NA	NA	NA	NA	NA	NA	NA	-0.56	1	Standard deviation	-1	Central estimate	Point estimate with uncertainty	No	No	NA	No	NA	6	No	NA	NA	NA
1695	Costedoat S., Corbera E., Ezzine-de-Blas D., Honey-Ros√©s J., Baylis K., Castillo-Santiago M.A.	how effective are biodiversity conservation payments in mexico?	We assess the additional forest cover protected by 13 rural communities located in the southern state of Chiapas, Mexico, as a result of the economic incentives received through the country's national program of payments for biodiversity conservation. We use spatially explicit data at the intra-community level to define a credible counterfactual of conservation outcomes. We use covariate-matching…	10.1371/journal.pone.0119881	2015	Latin America	Mexico	Forestry	REDD+	2008	2005	60	NA	96	2218	NA	NA	Rigorous observational study	Difference-in-difference + matching	Change in deforestation (%)	Fixed effects	16	NA	NA	Yes	0.351577	NA	NA	NA	NA	NA	NA	NA	-0.2	1	Standard deviation	NA	Central estimate	Only point estimate	No	No	NA	No	NA	NA	No	NA	NA	NA
1695	Costedoat S., Corbera E., Ezzine-de-Blas D., Honey-Ros√©s J., Baylis K., Castillo-Santiago M.A.	how effective are biodiversity conservation payments in mexico?	We assess the additional forest cover protected by 13 rural communities located in the southern state of Chiapas, Mexico, as a result of the economic incentives received through the country's national program of payments for biodiversity conservation. We use spatially explicit data at the intra-community level to define a credible counterfactual of conservation outcomes. We use covariate-matching…	10.1371/journal.pone.0119881	2015	Latin America	Mexico	Forestry	REDD+	2008	2005	60	NA	96	2524	NA	NA	Rigorous observational study	Difference-in-difference + matching	Change in deforestation (%)	Fixed effects	16	NA	NA	Yes	0.331969	NA	NA	NA	NA	NA	NA	NA	-0.2	1	Standard deviation	NA	Central estimate	Only point estimate	No	No	NA	No	NA	NA	No	NA	NA	NA
1695	Costedoat S., Corbera E., Ezzine-de-Blas D., Honey-Ros√©s J., Baylis K., Castillo-Santiago M.A.	how effective are biodiversity conservation payments in mexico?	We assess the additional forest cover protected by 13 rural communities located in the southern state of Chiapas, Mexico, as a result of the economic incentives received through the country's national program of payments for biodiversity conservation. We use spatially explicit data at the intra-community level to define a credible counterfactual of conservation outcomes. We use covariate-matching…	10.1371/journal.pone.0119881	2015	Latin America	Mexico	Forestry	REDD+	2008	2005	60	NA	96	2174	NA	NA	Rigorous observational study	Difference-in-difference + matching	Change in deforestation (%)	Fixed effects	16	NA	NA	Yes	0.27936	NA	NA	NA	NA	NA	NA	NA	-0.2	1	Standard deviation	NA	Central estimate	Only point estimate	No	No	NA	No	NA	NA	No	NA	NA	NA
1715	Clements T., Milner-Gulland E.J.	impact of payments for environmental services and protected areas on local livelihoods and forest conservation in northern cambodia	The potential impacts of payments for environmental services (PES) and protected areas (PAs) on environmental outcomes and local livelihoods in developing countries are contentious and have been widely debated. The available evidence is sparse, with few rigorous evaluations of the environmental and social impacts of PAs and particularly of PES. We measured the impacts on forests and human well-be…	10.1111/cobi.12423	2014	Asia	Cambodia	Forestry	REDD+	2005	2001	48	NA	108	650	217	433	Rigorous observational study	Difference in-means + matching	Change in deforestation (%)	Difference in means	82	NA	NA	Yes	0.230386	NA	NA	NA	NA	NA	NA	NA	-0.5	1	NA	-1	Central estimate	Point estimate with uncertainty	No	Yes	Positive	No	NA	NA	No	NA	NA	NA
148	Ramirez-Reyes C., Sims K.R.E., Potapov P., Radeloff V.C.	payments for ecosystem services in mexico reduce forest fragmentation	Forest fragmentation can lead to habitat reduction, edge increase, and exposure to disturbances. A key emerging policy to protect forests is payments for ecosystem services (PES), which offers compensation to landowners for environmental stewardship. Mexico was one of the first countries to implement a broad-scale PES program, enrolling over 2.3¬†Mha by 2010. However, Mexico's PES did not complet…	10.1002/eap.1753	2018	Latin America	Mexico	Forestry	REDD+	2000	2012	144	NA	144	5626	2972	2654	Rigorous observational study	Linear regressions + matching	Change in deforestation (%)	OLS	1991	1.26	0.24	Yes	0.140125	NA	NA	NA	NA	-0.0359	-2.34	-0.348189	-0.348189	1	Robust standard errors	-1	Central estimate	Point estimate with uncertainty	No	No	NA	No	NA	10	No	NA	NA	NA
2300	Honey-Roses J., Baylis K., Ramirez M.I.	a spatially explicit estimate of avoided forest loss	With the potential expansion of forest conservation programs spurred by climate-change agreements, there is a need to measure the extent to which such programs achieve their intended results. Conventional methods for evaluating conservation impact tend to be biased because they do not compare like areas or account for spatial relations. We assessed the effect of a conservation initiative that com…	10.1111/j.1523-1739.2011.01729.x	2018	Latin America	Mexico	Forestry	REDD+	2003	1993	72	NA	192	4203	NA	NA	Rigorous observational study	Difference-in-difference + matching	Avoided forest cover loss (%)	OLS	1039	2.6	2.1	Yes	0.0382449	NA	NA	NA	NA	NA	NA	NA	-0.224138	1	Standard errors	1	Central estimate	Point estimate with uncertainty	No	No	NA	No	NA	10	No	NA	NA	NA
293	Arriagada R.A., Ferraro P.J., Sills E.O., Pattanayak S.K., Cordero-Sancho S.	do payments for environmental services affect forest cover? a farm-level evaluation from costa rica	Payments for environmental services (PES) are popular despite little empirical evidence of their effectiveness. We estimate the impact of PES on forest cover in a region known for exemplary implementation of one of the best-known and longest-lived PES programs. Our evaluation design combines sampling that incorporates prematching, data from remote sensing and household surveys, and empirical meth…	10.3368/le.88.2.382	2012	Latin America	Costa Rica	Forestry	REDD+	1992	NA	156	NA	156	202	50	152	Rigorous observational study	Difference-in-difference + matching	Change in forest cover (%)	OLS	392	12.09	4.89	Yes	0.354103	NA	NA	NA	NA	1.35	-12.09	-9.95556	-9.95556	1	Robust standard errors	1	Central estimate	Point estimate with uncertainty	No	No	NA	No	NA	6	No	NA	NA	NA
293	Arriagada R.A., Ferraro P.J., Sills E.O., Pattanayak S.K., Cordero-Sancho S.	do payments for environmental services affect forest cover? a farm-level evaluation from costa rica	Payments for environmental services (PES) are popular despite little empirical evidence of their effectiveness. We estimate the impact of PES on forest cover in a region known for exemplary implementation of one of the best-known and longest-lived PES programs. Our evaluation design combines sampling that incorporates prematching, data from remote sensing and household surveys, and empirical meth…	10.3368/le.88.2.382	2012	Latin America	Costa Rica	Forestry	REDD+	1992	NA	156	NA	156	116	46	70	Rigorous observational study	Difference-in-difference + matching	Change in forest cover (%)	OLS	392	11.24	3.25	Yes	0.662521	NA	NA	NA	NA	1.35	-11.24	-9.32593	-9.32593	1	Robust standard errors	1	Central estimate	Point estimate with uncertainty	No	No	NA	No	NA	6	No	NA	NA	NA
293	Arriagada R.A., Ferraro P.J., Sills E.O., Pattanayak S.K., Cordero-Sancho S.	do payments for environmental services affect forest cover? a farm-level evaluation from costa rica	Payments for environmental services (PES) are popular despite little empirical evidence of their effectiveness. We estimate the impact of PES on forest cover in a region known for exemplary implementation of one of the best-known and longest-lived PES programs. Our evaluation design combines sampling that incorporates prematching, data from remote sensing and household surveys, and empirical meth…	10.3368/le.88.2.382	2012	Latin America	Costa Rica	Forestry	REDD+	1992	NA	156	NA	156	202	50	152	Rigorous observational study	Difference-in-difference + matching	Change in forest cover (%)	OLS	392	4.65	1.41	Yes	0.472331	NA	NA	NA	NA	1.35	-4.65	-4.44444	-4.44444	1	Robust standard errors	1	Central estimate	Point estimate with uncertainty	No	No	NA	No	NA	6	No	NA	NA	NA
293	Arriagada R.A., Ferraro P.J., Sills E.O., Pattanayak S.K., Cordero-Sancho S.	do payments for environmental services affect forest cover? a farm-level evaluation from costa rica	Payments for environmental services (PES) are popular despite little empirical evidence of their effectiveness. We estimate the impact of PES on forest cover in a region known for exemplary implementation of one of the best-known and longest-lived PES programs. Our evaluation design combines sampling that incorporates prematching, data from remote sensing and household surveys, and empirical meth…	10.3368/le.88.2.382	2012	Latin America	Costa Rica	Forestry	REDD+	1992	NA	156	NA	156	116	46	70	Rigorous observational study	Difference-in-difference + matching	Change in forest cover (%)	OLS	392	7.03	2.4	Yes	0.561127	NA	NA	NA	NA	1.35	-7.03	-6.20741	-6.20741	1	Robust standard errors	1	Central estimate	Point estimate with uncertainty	No	No	NA	No	NA	6	No	NA	NA	NA
939	Ruggiero P.G.C., Metzger J.P., Reverberi Tambosi L., Nichols E.	payment for ecosystem services programs in the brazilian atlantic forest: effective but not enough	Payment for ecosystem services (PES) are economic incentives intended to generate conservation benefits, principally on private properties. The global portfolio of PES programs is estimated to represent an annual investment of more than USD $36 billion. Despite this substantial investment, the continued lack of systematic and rigorous impact evaluation of PES has contributed to uncertainty regard…	10.1016/j.landusepol.2018.11.054	2019	Latin America	Brazil	Forestry	REDD+	2007	NA	96	NA	96	166	83	83	Rigorous observational study	Difference-in-difference + matching	Change in forest cover (%)	OLS	288	0.906	0.28	Yes	0.505334	NA	NA	NA	NA	NA	NA	-2.48649	-2.48649	1	Standard errors	1	Central estimate	Point estimate with uncertainty	No	Yes	NA	No	NA	1	No	NA	NA	NA
939	Ruggiero P.G.C., Metzger J.P., Reverberi Tambosi L., Nichols E.	payment for ecosystem services programs in the brazilian atlantic forest: effective but not enough	Payment for ecosystem services (PES) are economic incentives intended to generate conservation benefits, principally on private properties. The global portfolio of PES programs is estimated to represent an annual investment of more than USD $36 billion. Despite this substantial investment, the continued lack of systematic and rigorous impact evaluation of PES has contributed to uncertainty regard…	10.1016/j.landusepol.2018.11.054	2019	Latin America	Brazil	Forestry	REDD+	2007	NA	96	NA	96	166	83	83	Rigorous observational study	Difference-in-difference + matching	Change in forest cover (%)	OLS	288	11.19	5.63	Yes	0.250053	NA	NA	NA	NA	NA	NA	-2.48649	-2.48649	1	Standard errors	1	Central estimate	Point estimate with uncertainty	No	Yes	NA	No	NA	1	No	NA	NA	NA
7439	Robalino, J; Pfaff, A; Sandoval, C; Sanchez-Azofeifa, GA	can we increase the impacts from payments for ecosystem services? impact rose over time in costa rica, yet spatial variation indicates more potential	As programs with payments for ecosystem services (PES) have become more numerous, raising the need for and also the opportunity for rigorous evidence on their contributions, we examine shifts within Costa Rica's Pagos por Servicios Ambientales (PSA) program. The PSA was heralded from its initiation, despite demonstrations of low early impacts. We study shifts in impact over time across early peri…	10.1016/j.forpol.2021.102577	2021	Latin America	Costa Rica	Forestry	REDD+	1997	NA	96	NA	96	9917	9361	556	Rigorous observational study	Linear regressions + matching	Change in deforestation (%)	OLS	5	0.0299	NA	Yes	0.12243	NA	NA	NA	0.01	0.0247	-0.0299	-1.21053	-1.21053	1	Standard errors	-1	Upper bound	Point estimate with uncertainty	No	No	NA	No	NA	12	No	NA	NA	NA
1000001	Robalino et al	Evaluating Interactions of Forest Conservation Policies on Avoided Deforestation	We estimate the effects on deforestation that have resulted from policy interactions between parks and payments and between park buffers and payments in Costa Rica between 2000 and 2005. We show that the characteristics of the areas where protected and unprotected lands are located differ significantly. Additionally, we find that land characteristics of each of the policies and of the places wher…	doi.org/10.1371/journal.pone.0124910	2015	Latin America	Costa Rica	Forestry	REDD+	2000	NA	60	NA	60	556	NA	NA	Rigorous observational study	Linear regressions + matching	Change in deforestation (%)	OLS	12	0.0275	0.009	Yes	0.0565844	NA	NA	NA	NA	NA	NA	0.0275	-0.0275	1	Standard errors	-1	Lower bound	Point estimate with uncertainty	No	No	NA	No	NA	11	No	NA	NA	NA
1000001	Robalino et al	Evaluating Interactions of Forest Conservation Policies on Avoided Deforestation	We estimate the effects on deforestation that have resulted from policy interactions between parks and payments and between park buffers and payments in Costa Rica between 2000 and 2005. We show that the characteristics of the areas where protected and unprotected lands are located differ significantly. Additionally, we find that land characteristics of each of the policies and of the places wher…	doi.org/10.1371/journal.pone.0124910	2015	Latin America	Costa Rica	Forestry	REDD+	2000	NA	60	NA	60	556	NA	NA	Rigorous observational study	Linear regressions + matching	Change in deforestation (%)	OLS	12	0.0284	0.009	Yes	0.0584362	NA	NA	NA	NA	NA	NA	0.0284	-0.0284	1	Standard errors	-1	Lower bound	Point estimate with uncertainty	No	No	NA	No	NA	11	No	NA	NA	NA
1000001	Robalino et al	Evaluating Interactions of Forest Conservation Policies on Avoided Deforestation	We estimate the effects on deforestation that have resulted from policy interactions between parks and payments and between park buffers and payments in Costa Rica between 2000 and 2005. We show that the characteristics of the areas where protected and unprotected lands are located differ significantly. Additionally, we find that land characteristics of each of the policies and of the places wher…	doi.org/10.1371/journal.pone.0124910	2015	Latin America	Costa Rica	Forestry	REDD+	2000	NA	60	NA	60	556	NA	NA	Rigorous observational study	Linear regressions + matching	Change in deforestation (%)	OLS	12	0.0279	0.009	Yes	0.0472416	NA	NA	NA	NA	NA	NA	0.0279	-0.0279	1	Standard errors	-1	Lower bound	Point estimate with uncertainty	No	No	NA	No	NA	11	No	NA	NA	NA
1000001	Robalino et al	Evaluating Interactions of Forest Conservation Policies on Avoided Deforestation	We estimate the effects on deforestation that have resulted from policy interactions between parks and payments and between park buffers and payments in Costa Rica between 2000 and 2005. We show that the characteristics of the areas where protected and unprotected lands are located differ significantly. Additionally, we find that land characteristics of each of the policies and of the places wher…	doi.org/10.1371/journal.pone.0124910	2015	Latin America	Costa Rica	Forestry	REDD+	2000	NA	60	NA	60	556	NA	NA	Rigorous observational study	Linear regressions + matching	Change in deforestation (%)	OLS	12	0.029	0.009	Yes	0.0491042	NA	NA	NA	NA	NA	NA	0.029	-0.029	1	Standard errors	-1	Lower bound	Point estimate with uncertainty	No	No	NA	No	NA	11	No	NA	NA	NA
1280	Bos A.B., Duchelle A.E., Angelsen A., Avitabile V., De Sy V., Herold M., Joseph S., De Sassi C., Sills E.O., Sunderlin W.D., Wunder S.	comparing methods for assessing the effectiveness of subnational redd+ initiatives	The central role of forests in climate change mitigation, as recognized in the Paris agreement, makes it increasingly important to develop and test methods for monitoring and evaluating the carbon effectiveness of REDD+. Over the last decade, hundreds of subnational REDD+ initiatives have emerged, presenting an opportunity to pilot and compare different approaches to quantifying impacts on carbon…	10.1088/1748-9326/aa7032	2017	Multiple	Multiple	Forestry	REDD+	2006	NA	84	NA	84	46	23	NA	Rigorous observational study	Difference-in-difference + matching	Change in deforestation (%)	OLS	10	NA	NA	Yes	1.09668	NA	NA	0.089	NA	0.664	-0.089	-0.134036	-0.134036	1	NA	-1	Central estimate	Only point estimate	No	No	NA	No	NA	NA	No	NA	NA	NA
1280	Bos A.B., Duchelle A.E., Angelsen A., Avitabile V., De Sy V., Herold M., Joseph S., De Sassi C., Sills E.O., Sunderlin W.D., Wunder S.	comparing methods for assessing the effectiveness of subnational redd+ initiatives	The central role of forests in climate change mitigation, as recognized in the Paris agreement, makes it increasingly important to develop and test methods for monitoring and evaluating the carbon effectiveness of REDD+. Over the last decade, hundreds of subnational REDD+ initiatives have emerged, presenting an opportunity to pilot and compare different approaches to quantifying impacts on carbon…	10.1088/1748-9326/aa7032	2017	Multiple	Multiple	Forestry	REDD+	2006	NA	84	NA	84	32	16	NA	Rigorous observational study	Difference-in-difference + matching	Change in deforestation (%)	OLS	10	NA	NA	Yes	1.31487	NA	NA	0.449	NA	1.023	-0.449	-0.438905	-0.438905	1	NA	-1	Central estimate	Only point estimate	No	No	NA	No	NA	NA	No	NA	NA	NA
731	Correa J., Cisneros E., B√∂rner J., Pfaff A., Costa M., Raj√£o R.	evaluating redd+ at subnational level: amazon fund impacts in alta floresta, brazil	The Amazon Fund is the world's largest program to reduce emissions from deforestation and forest degradation (REDD+), funded with over US $1b donated by Norway and Germany between 2008 and 2017 to reward Brazil for prior deforestation reductions. Olhos D'√Ågua da Amaz√¥nia is cited as a leading project success ‚àí with over one thousand small-to-medium-sized crop and livestock producers in the mu…	10.1016/j.forpol.2020.102178	2020	Latin America	Brazil	Forestry	REDD+	2011	2003	60	NA	96	1	1	NA	Rigorous observational study	Synthetic Control Method	Change in deforestation (%)	NA	7	NA	NA	No	NA	NA	NA	NA	NA	NA	NA	0	0	1	NA	NA	Central estimate	Only point estimate	No	Yes	Positive	No	NA	NA	No	NA	NA	NA
705	Ellis E.A., Sierra-Huelsz J.A., Ceballos G.C.O., Binnq√ºist C.L., Cerd√°n C.R.	mixed effectiveness of redd+ subnational initiatives after 10 years of interventions on the yucatan peninsula, mexico	Since 2010, the Reducing Emissions from Deforestation and Degradation (REDD+) mechanism has been implemented in Mexico's Yucatan Peninsula, a biodiversity hotspot with persistent deforestation problems. We apply the before-after-control-intervention approach and quasi-experimental methods to evaluate the effectiveness of REDD+ interventions in reducing deforestation at municipal (meso) and commun…	10.3390/f11091005	2020	Latin America	Mexico	Forestry	REDD+	2010	2000	96	NA	216	84	42	42	Rigorous observational study	Multiple	Change in forest cover (%)	OLS	11	NA	NA	Yes	0.029361	NA	NA	0.029361	NA	NA	NA	NA	0.0208333	1	Standard errors	1	Central estimate	Point estimate with uncertainty	No	No	NA	No	NA	NA	No	NA	NA	NA
705	Ellis E.A., Sierra-Huelsz J.A., Ceballos G.C.O., Binnq√ºist C.L., Cerd√°n C.R.	mixed effectiveness of redd+ subnational initiatives after 10 years of interventions on the yucatan peninsula, mexico	Since 2010, the Reducing Emissions from Deforestation and Degradation (REDD+) mechanism has been implemented in Mexico's Yucatan Peninsula, a biodiversity hotspot with persistent deforestation problems. We apply the before-after-control-intervention approach and quasi-experimental methods to evaluate the effectiveness of REDD+ interventions in reducing deforestation at municipal (meso) and commun…	10.3390/f11091005	2020	Latin America	Mexico	Forestry	REDD+	2010	2000	96	NA	216	1368	140	1228	Rigorous observational study	Multiple	Change in forest cover (%)	OLS	11	NA	NA	Yes	0.091597	NA	NA	0.091597	NA	NA	NA	NA	0.0549828	1	Standard errors	-1	Central estimate	Point estimate with uncertainty	No	No	NA	No	NA	NA	No	NA	NA	NA
109	Roopsind A., Sohngen B., Brandt J.	evidence that a national redd+ program reduces tree cover loss and carbon emissions in a high forest cover, low deforestation country	Reducing emissions from deforestation and forest degradation (REDD+) is a climate change mitigation policy in which rich countries provide payments to developing countries for protecting their forests. In 2009, the countries of Norway and Guyana entered into one of the first bilateral REDD+ programs, with Norway offering to pay US$250 million to Guyana if annual deforestation rates remained below…	10.1073/pnas.1904027116	2019	Latin America	Guyana	Forestry	REDD+	2010	2000	60	24	204	7	1	6	Rigorous observational study	Synthetic Control Method	Difference in tree cover loss (%)	NA	24496	NA	NA	No	NA	NA	NA	NA	NA	NA	NA	NA	-0.282851	NA	NA	-1	Central estimate	Only point estimate	Yes	No	NA	Yes	Inconclusive	NA	No	NA	NA	NA
1223	Sims K.R.E., Alix-Garcia J.M.	parks versus pes: evaluating direct and incentive-based land conservation in mexico	Protected areas (PAs) and payments for ecosystem services (PES) are the top two mechanisms available for countries to achieve international REDD agreements, yet there are few empirical comparisons of their effects. We estimate the impacts of PAs and PES on forest conservation, poverty reduction, and population change at the locality level in Mexico in the 2000s. Both policies conserved forest, ge…	10.1016/j.jeem.2016.11.010	2016	Latin America	Mexico	Forestry	REDD+	2000	1990	144	NA	144	59535	NA	NA	Rigorous observational study	Fixed effects	Change in forest cover (%)	Fixed effects	18	0.2516	0.0685	Yes	0.0301116	NA	NA	NA	NA	NA	NA	-0.2516	-0.2516	1	Robust standard errors	1	Central estimate	Point estimate with uncertainty	No	Yes	Positive	No	NA	18	No	NA	NA	NA
1223	Sims K.R.E., Alix-Garcia J.M.	parks versus pes: evaluating direct and incentive-based land conservation in mexico	Protected areas (PAs) and payments for ecosystem services (PES) are the top two mechanisms available for countries to achieve international REDD agreements, yet there are few empirical comparisons of their effects. We estimate the impacts of PAs and PES on forest conservation, poverty reduction, and population change at the locality level in Mexico in the 2000s. Both policies conserved forest, ge…	10.1016/j.jeem.2016.11.010	2016	Latin America	Mexico	Forestry	REDD+	2000	1990	144	NA	144	59535	NA	NA	Rigorous observational study	Fixed effects	Change in forest cover (%)	Fixed effects	18	0.2384	0.0685	Yes	0.0285318	NA	NA	NA	NA	NA	NA	-0.2384	-0.2384	1	Robust standard errors	1	Central estimate	Point estimate with uncertainty	No	Yes	Positive	No	NA	18	No	NA	NA	NA
1731	Alix-Garcia J.M., Sims K.R.E., Yañez-Pagans P.	only one tree from each seed? environmental effectiveness and poverty alleviation in mexico's payments for ecosystem services program	Environmental conditional cash transfers are popular but their impacts are not well understood. We evaluate land cover and wealth impacts of a federal program that pays landowners for protecting forest. Panel data for program beneficiaries and rejected applicants allow us to control for fixed differences and time trends affecting both groups. We find the program reduces the expected land cover lo…	10.1257/pol.20130139	2015	Latin America	Mexico	Forestry	REDD+	2003	2000	96	NA	132	196164	NA	NA	Rigorous observational study	Difference-in-difference	MNDVI (mean dry season NDVI)	Fixed effects	17	0.1863	0.0721	Yes	0.0350089	NA	NA	NA	NA	NA	NA	-0.455	-0.455	1	Robust standard errors	1	Central estimate	Point estimate with uncertainty	No	Yes	Positive	No	NA	5	No	NA	NA	NA
1731	Alix-Garcia J.M., Sims K.R.E., Yañez-Pagans P.	only one tree from each seed? environmental effectiveness and poverty alleviation in mexico's payments for ecosystem services program	Environmental conditional cash transfers are popular but their impacts are not well understood. We evaluate land cover and wealth impacts of a federal program that pays landowners for protecting forest. Panel data for program beneficiaries and rejected applicants allow us to control for fixed differences and time trends affecting both groups. We find the program reduces the expected land cover lo…	10.1257/pol.20130139	2015	Latin America	Mexico	Forestry	REDD+	2003	2000	96	NA	132	196164	NA	NA	Rigorous observational study	Difference-in-difference	MNDVI (mean dry season NDVI)	Fixed effects	17	0.0265	0.0127	Yes	0.0282712	NA	NA	NA	NA	NA	NA	-0.32	-0.32	1	Robust standard errors	1	Central estimate	Point estimate with uncertainty	No	Yes	Positive	No	NA	5	No	NA	NA	NA
1731	Alix-Garcia J.M., Sims K.R.E., Yañez-Pagans P.	only one tree from each seed? environmental effectiveness and poverty alleviation in mexico's payments for ecosystem services program	Environmental conditional cash transfers are popular but their impacts are not well understood. We evaluate land cover and wealth impacts of a federal program that pays landowners for protecting forest. Panel data for program beneficiaries and rejected applicants allow us to control for fixed differences and time trends affecting both groups. We find the program reduces the expected land cover lo…	10.1257/pol.20130139	2015	Latin America	Mexico	Forestry	REDD+	2003	2000	96	NA	132	196164	NA	NA	Rigorous observational study	Difference-in-difference	MNDVI (mean dry season NDVI)	Fixed effects	17	0.2455	0.0737	Yes	0.0451321	NA	NA	NA	NA	NA	NA	-0.525	-0.525	1	Robust standard errors	1	Central estimate	Point estimate with uncertainty	No	Yes	Positive	No	NA	5	No	NA	NA	NA
1731	Alix-Garcia J.M., Sims K.R.E., Yañez-Pagans P.	only one tree from each seed? environmental effectiveness and poverty alleviation in mexico's payments for ecosystem services program	Environmental conditional cash transfers are popular but their impacts are not well understood. We evaluate land cover and wealth impacts of a federal program that pays landowners for protecting forest. Panel data for program beneficiaries and rejected applicants allow us to control for fixed differences and time trends affecting both groups. We find the program reduces the expected land cover lo…	10.1257/pol.20130139	2015	Latin America	Mexico	Forestry	REDD+	2003	2000	96	NA	132	196164	NA	NA	Rigorous observational study	Difference-in-difference	MNDVI (mean dry season NDVI)	Fixed effects	17	0.0352	0.0125	Yes	0.0381535	NA	NA	NA	NA	NA	NA	-0.375	-0.375	1	Robust standard errors	1	Central estimate	Point estimate with uncertainty	No	Yes	Positive	No	NA	5	No	NA	NA	NA
2228	Alix-Garcia J.M., Shapiro E.N., Sims K.R.E.	forest conservation and slippage: evidence from mexico's national payments for ecosystem services program	We investigate a Mexican federal program that compensates landowners for forest protection. We use matched controls from the program applicant pool to establish counterfactual deforestation rates. Deforestation was reduced by 50% in enrolled parcels, but expected average clearing rates without the program were low (0.8% per year), suggesting modest total avoided deforestation benefits. We test fo…	10.3368/le.88.4.613	2012	Latin America	Mexico	Forestry	REDD+	2003	NA	36	NA	36	633	NA	NA	Rigorous observational study	Linear regressions + matching	Deforestation (% of property deforested 2003-2006)	OLS	626	1.03	0.6	Yes	0.120412	NA	NA	NA	NA	NA	NA	-0.5	-0.5	1	Standard errors	-1	Central estimate	Point estimate with uncertainty	No	No	NA	Yes	Negative	4	No	NA	NA	NA
2228	Alix-Garcia J.M., Shapiro E.N., Sims K.R.E.	forest conservation and slippage: evidence from mexico's national payments for ecosystem services program	We investigate a Mexican federal program that compensates landowners for forest protection. We use matched controls from the program applicant pool to establish counterfactual deforestation rates. Deforestation was reduced by 50% in enrolled parcels, but expected average clearing rates without the program were low (0.8% per year), suggesting modest total avoided deforestation benefits. We test fo…	10.3368/le.88.4.613	2012	Latin America	Mexico	Forestry	REDD+	2003	NA	36	NA	36	633	NA	NA	Rigorous observational study	Linear regressions + matching	Deforestation (% of property deforested 2003-2006)	OLS	626	1.1	0.35	Yes	0.250032	NA	NA	NA	NA	NA	NA	-0.5	-0.5	1	Standard errors	-1	Central estimate	Point estimate with uncertainty	No	No	NA	Yes	Negative	4	No	NA	NA	NA
2228	Alix-Garcia J.M., Shapiro E.N., Sims K.R.E.	forest conservation and slippage: evidence from mexico's national payments for ecosystem services program	We investigate a Mexican federal program that compensates landowners for forest protection. We use matched controls from the program applicant pool to establish counterfactual deforestation rates. Deforestation was reduced by 50% in enrolled parcels, but expected average clearing rates without the program were low (0.8% per year), suggesting modest total avoided deforestation benefits. We test fo…	10.3368/le.88.4.613	2012	Latin America	Mexico	Forestry	REDD+	2003	NA	36	NA	36	633	NA	NA	Rigorous observational study	Linear regressions + matching	Deforestation (% of property deforested 2003-2006)	OLS	626	1.03	0.58	Yes	0.124564	NA	NA	NA	NA	NA	NA	-0.5	-0.5	1	Standard errors	-1	Central estimate	Point estimate with uncertainty	No	No	NA	Yes	Negative	4	No	NA	NA	NA
2228	Alix-Garcia J.M., Shapiro E.N., Sims K.R.E.	forest conservation and slippage: evidence from mexico's national payments for ecosystem services program	We investigate a Mexican federal program that compensates landowners for forest protection. We use matched controls from the program applicant pool to establish counterfactual deforestation rates. Deforestation was reduced by 50% in enrolled parcels, but expected average clearing rates without the program were low (0.8% per year), suggesting modest total avoided deforestation benefits. We test fo…	10.3368/le.88.4.613	2012	Latin America	Mexico	Forestry	REDD+	2003	NA	36	NA	36	633	NA	NA	Rigorous observational study	Linear regressions + matching	Deforestation (% of property deforested 2003-2006)	OLS	626	1.57	0.44	Yes	0.283869	NA	NA	NA	NA	NA	NA	-0.5	-0.5	1	Standard errors	-1	Central estimate	Point estimate with uncertainty	No	No	NA	Yes	Negative	4	No	NA	NA	NA
1236	Chervier C., Costedoat S.	heterogeneous impact of a collective payment for environmental services scheme on reducing deforestation in cambodia	Payments for Environmental Services (PES) are increasingly used in tropical countries as incentives to improve forest conservation outcomes, notably in forests managed or owned by rural communities. However, little is known about the performance and the suitable conditions under which collective PES can be effective. We assess the impact of a collective PES on reducing deforestation in the Cardam…	10.1016/j.worlddev.2017.04.014	2017	Asia	Cambodia	Forestry	REDD+	2005	2000	84	NA	144	901	644	257	Rigorous observational study	Difference-in-difference + matching	ha per year per grid cell during 2005–12.	Difference in means	154	NA	NA	Yes	0.274398	NA	NA	1.28	0.01	14.06	1.28	-0.0910384	-0.0910384	1	NA	1	Lower bound	Point estimate with uncertainty	No	No	NA	No	NA	NA	No	NA	NA	NA
1236	Chervier C., Costedoat S.	heterogeneous impact of a collective payment for environmental services scheme on reducing deforestation in cambodia	Payments for Environmental Services (PES) are increasingly used in tropical countries as incentives to improve forest conservation outcomes, notably in forests managed or owned by rural communities. However, little is known about the performance and the suitable conditions under which collective PES can be effective. We assess the impact of a collective PES on reducing deforestation in the Cardam…	10.1016/j.worlddev.2017.04.014	2017	Asia	Cambodia	Forestry	REDD+	2005	2000	84	NA	144	1078	664	414	Rigorous observational study	Difference-in-difference + matching	ha per year per grid cell during 2005–12.	Difference in means	154	NA	NA	Yes	0.232892	NA	NA	1.03	0.01	14.06	1.03	-0.0732575	-0.0732575	1	NA	1	Lower bound	Point estimate with uncertainty	No	No	NA	No	NA	NA	No	NA	NA	NA
1236	Chervier C., Costedoat S.	heterogeneous impact of a collective payment for environmental services scheme on reducing deforestation in cambodia	Payments for Environmental Services (PES) are increasingly used in tropical countries as incentives to improve forest conservation outcomes, notably in forests managed or owned by rural communities. However, little is known about the performance and the suitable conditions under which collective PES can be effective. We assess the impact of a collective PES on reducing deforestation in the Cardam…	10.1016/j.worlddev.2017.04.014	2017	Asia	Cambodia	Forestry	REDD+	2005	2000	84	NA	144	841	594	247	Rigorous observational study	Difference-in-difference + matching	ha per year per grid cell during 2005–12.	Difference in means	154	NA	NA	Yes	0.281569	NA	NA	1.32	0.01	14.06	1.32	-0.0938834	-0.0938834	1	NA	1	Lower bound	Point estimate with uncertainty	No	No	NA	No	NA	NA	No	NA	NA	NA
713	Jones K.W., Mayer A., Von Thaden J., Berry Z.C., López-Ramírez S., Salcone J., Manson R.H., Asbjornsen H.	measuring the net benefits of payments for hydrological services programs in mexico	A number of studies show that payments for ecosystem services (PES) programs contribute to reducing deforestation, but few have measured the impact on ecosystem service provision or compared economic benefits and costs of these programs. We integrate impact evaluation and ecosystem service measurement to examine the effects of PES programs in Veracruz, Mexico. We use quasi-experimental methods to…	10.1016/j.ecolecon.2020.106666	2020	Latin America	Mexico	Forestry	REDD+	2003	1993	120	NA	240	2688	NA	NA	Rigorous observational study	Fixed effects	Change in forest cover (primary and secondary) (ha)	Fixed effects	7	0.0002	0.0002	Yes	0.038583	NA	NA	NA	NA	NA	NA	NA	-0.190476	1	Robust standard errors	1	Central estimate	Point estimate with uncertainty	No	Yes	Positive	No	NA	NA	No	NA	NA	NA
713	Jones K.W., Mayer A., Von Thaden J., Berry Z.C., López-Ramírez S., Salcone J., Manson R.H., Asbjornsen H.	measuring the net benefits of payments for hydrological services programs in mexico	A number of studies show that payments for ecosystem services (PES) programs contribute to reducing deforestation, but few have measured the impact on ecosystem service provision or compared economic benefits and costs of these programs. We integrate impact evaluation and ecosystem service measurement to examine the effects of PES programs in Veracruz, Mexico. We use quasi-experimental methods to…	10.1016/j.ecolecon.2020.106666	2020	Latin America	Mexico	Forestry	REDD+	2003	1993	120	NA	240	9456	NA	NA	Rigorous observational study	Fixed effects	Change in forest cover (primary and secondary) (ha)	Fixed effects	7	0.004	0.001	Yes	0.0822734	NA	NA	NA	NA	NA	NA	NA	-0.190476	1	Robust standard errors	1	Central estimate	Point estimate with uncertainty	No	Yes	Positive	No	NA	NA	No	NA	NA	NA
713	Jones K.W., Mayer A., Von Thaden J., Berry Z.C., López-Ramírez S., Salcone J., Manson R.H., Asbjornsen H.	measuring the net benefits of payments for hydrological services programs in mexico	A number of studies show that payments for ecosystem services (PES) programs contribute to reducing deforestation, but few have measured the impact on ecosystem service provision or compared economic benefits and costs of these programs. We integrate impact evaluation and ecosystem service measurement to examine the effects of PES programs in Veracruz, Mexico. We use quasi-experimental methods to…	10.1016/j.ecolecon.2020.106666	2020	Latin America	Mexico	Forestry	REDD+	2003	1993	120	NA	240	9560	NA	NA	Rigorous observational study	Fixed effects	Change in forest cover (primary and secondary) (ha)	Fixed effects	7	0.002	0.001	Yes	0.0409123	NA	NA	NA	NA	NA	NA	NA	-0.190476	1	Robust standard errors	1	Central estimate	Point estimate with uncertainty	No	Yes	Positive	No	NA	NA	No	NA	NA	NA
918	Giudice R., Börner J., Wunder S., Cisneros E.	selection biases and spillovers from collective conservation incentives in the peruvian amazon	Payments for ecosystem services are becoming popular components in strategies to conserve ecosystems and biodiversity, but their effectiveness remains poorly documented. Here we present counterfactual-based evidence on the conservation outcomes of the pilot stage of Peru's National Forest Conservation Program (NFCP). The NFCP provides direct payments to indigenous communities in the Amazon, condi…	10.1088/1748-9326/aafc83	2019	Latin America	Peru	Forestry	REDD+	2001	NA	168	NA	168	1400	NA	NA	Rigorous observational study	Fixed effects	Change in deforestation (ha)	Fixed effects	8	6.902	3.624	Yes	0.101838	NA	NA	NA	NA	NA	NA	-0.058	-0.058	1	Clustered standard errors	-1	Central estimate	Point estimate with uncertainty	No	No	NA	Yes	Positive	4	No	NA	NA	NA
918	Giudice R., Börner J., Wunder S., Cisneros E.	selection biases and spillovers from collective conservation incentives in the peruvian amazon	Payments for ecosystem services are becoming popular components in strategies to conserve ecosystems and biodiversity, but their effectiveness remains poorly documented. Here we present counterfactual-based evidence on the conservation outcomes of the pilot stage of Peru's National Forest Conservation Program (NFCP). The NFCP provides direct payments to indigenous communities in the Amazon, condi…	10.1088/1748-9326/aafc83	2019	Latin America	Peru	Forestry	REDD+	2001	NA	168	NA	168	27608	NA	NA	Rigorous observational study	Fixed effects	Change in deforestation (ha)	Fixed effects	8	0.245	0.153	Yes	0.0192764	NA	NA	NA	NA	NA	NA	-0.058	-0.058	1	Clustered standard errors	-1	Central estimate	Point estimate with uncertainty	No	No	NA	Yes	Positive	4	No	NA	NA	NA
918	Giudice R., Börner J., Wunder S., Cisneros E.	selection biases and spillovers from collective conservation incentives in the peruvian amazon	Payments for ecosystem services are becoming popular components in strategies to conserve ecosystems and biodiversity, but their effectiveness remains poorly documented. Here we present counterfactual-based evidence on the conservation outcomes of the pilot stage of Peru's National Forest Conservation Program (NFCP). The NFCP provides direct payments to indigenous communities in the Amazon, condi…	10.1088/1748-9326/aafc83	2019	Latin America	Peru	Forestry	REDD+	2001	NA	168	NA	168	14644	NA	NA	Rigorous observational study	Fixed effects	Change in deforestation (ha)	Fixed effects	8	0.039	0.09	Yes	0.00716302	NA	NA	NA	NA	NA	NA	-0.058	-0.058	1	Clustered standard errors	1	Central estimate	Point estimate with uncertainty	No	No	NA	Yes	Positive	4	No	NA	NA	NA
918	Giudice R., Börner J., Wunder S., Cisneros E.	selection biases and spillovers from collective conservation incentives in the peruvian amazon	Payments for ecosystem services are becoming popular components in strategies to conserve ecosystems and biodiversity, but their effectiveness remains poorly documented. Here we present counterfactual-based evidence on the conservation outcomes of the pilot stage of Peru's National Forest Conservation Program (NFCP). The NFCP provides direct payments to indigenous communities in the Amazon, condi…	10.1088/1748-9326/aafc83	2019	Latin America	Peru	Forestry	REDD+	2001	NA	168	NA	168	18340	NA	NA	Rigorous observational study	Fixed effects	Change in deforestation (ha)	Fixed effects	8	0.386	0.21	Yes	0.0271492	NA	NA	NA	NA	NA	NA	-0.058	-0.058	1	Clustered standard errors	-1	Central estimate	Point estimate with uncertainty	No	No	NA	Yes	Positive	4	No	NA	NA	NA
1615	Jones K.W., Lewis D.J.	estimating the counterfactual impact of conservation programs on land cover outcomes: the role of matching and panel regression techniques	Deforestation and conversion of native habitats continues to be the leading driver of biodiversity and ecosystem service loss. A number of conservation policies and programs are implemented-from protected areas to payments for ecosystem services (PES)-to deter these losses. Currently, empirical evidence on whether these approaches stop or slow land cover change is lacking, but there is increasing…	10.1371/journal.pone.0141380	2015	Latin America	Ecuador	Forestry	REDD+	2011	2004	24	NA	108	784	NA	NA	Rigorous observational study	Fixed effects	Change in deforestation rate (%)	Fixed effects	15	0.422	0.137	Yes	0.220161	NA	NA	NA	NA	0.55	-0.422	-0.767273	-0.767273	1	Standard errors	-1	Central estimate	Point estimate with uncertainty	No	No	NA	No	NA	0	No	NA	NA	NA
478	Cisneros E., Börner J., Pagiola S., Wunder S.	impacts of conservation incentives in protected areas: the case of bolsa floresta, brazil	Conditional incentives are a promising complementary approach to conserve tropical forests, for example, in multiple-use protected areas. In this paper we analyze the environmental impacts of Bolsa Floresta, a forest conservation program that combines direct conditional payments with livelihood-focused investments in 15 multiple-use reserves in the Brazilian state of Amazonas. We use grid-based d…	10.1016/j.jeem.2021.102572	2022	Latin America	Brazil	Forestry	REDD+	2007	2004	96	NA	132	113928	NA	NA	Rigorous observational study	Fixed effects + matched	Change in deforestation (%)	Fixed effects	8	0.1	0.02	Yes	0.0296272	NA	NA	NA	NA	NA	NA	-0.1	-0.1	1	Clustered standard errors	-1	Central estimate	Point estimate with uncertainty	No	No	NA	No	NA	2	No	NA	NA	NA
478	Cisneros E., Börner J., Pagiola S., Wunder S.	impacts of conservation incentives in protected areas: the case of bolsa floresta, brazil	Conditional incentives are a promising complementary approach to conserve tropical forests, for example, in multiple-use protected areas. In this paper we analyze the environmental impacts of Bolsa Floresta, a forest conservation program that combines direct conditional payments with livelihood-focused investments in 15 multiple-use reserves in the Brazilian state of Amazonas. We use grid-based d…	10.1016/j.jeem.2021.102572	2022	Latin America	Brazil	Forestry	REDD+	2007	2004	96	NA	132	66458	NA	NA	Rigorous observational study	Fixed effects + matched	Change in deforestation (%)	Fixed effects	8	0.108	0.024	Yes	0.0349123	NA	NA	NA	NA	NA	NA	-0.1	-0.1	1	Clustered standard errors	-1	Central estimate	Point estimate with uncertainty	No	No	NA	No	NA	2	No	NA	NA	NA
660	Etchart N., Freire J.L., Holland M.B., Jones K.W., Naughton-Treves L.	what happens when the money runs out? forest outcomes and equity concerns following ecuador's suspension of conservation payments	Payments for Ecosystem Services (PES) are now a prominent policy instrument for conserving tropical forests. PES are voluntary, direct, and contractual: an ES buyer pays an ES steward for adopting conservation practices for a fixed term. A defining feature of PES is its ‘quid pro quo’ conditionality, e.g. stewards are paid only if they deliver contracted conservation outcomes. Most studies on PES…	10.1016/j.worlddev.2020.105124	2020	Latin America	Brazil	Forestry	REDD+	2011	2004	36	24	156	1232	NA	NA	Rigorous observational study	Fixed effects + matched	Change in forest cover (%)	Fixed effects	8	0.48	0.19	Yes	0.144067	NA	NA	NA	NA	0.67	0.48	-0.283582	-0.283582	1	Standard errors	1	Central estimate	Point estimate with uncertainty	Yes	No	NA	No	NA	1	No	NA	NA	NA
1517	Pagiola S., Honey-Rosés J., Freire-González J.	evaluation of the permanence of land use change induced by payments for environmental services in quindío, colombia	The effectiveness of conservation interventions such as Payments for Environmental Services (PES) is often evaluated-if it is evaluated at all-only at the completion of the intervention. Since gains achieved by the intervention may be lost after it ends, even apparently successful interventions may not result in long-term conservation benefits, a problem known as that of permanence. This paper us…	10.1371/journal.pone.0147829	2016	Latin America	Colombia	Forestry	REDD+	2003	NA	60	48	96	202	NA	NA	Rigorous observational study	Difference-in-difference	Change in ESI (%)	DID-estimator	22	0.457	0.166	Yes	0.399449	NA	NA	NA	NA	NA	NA	NA	-0.590909	1	Standard errors	1	Central estimate	Point estimate with uncertainty	Yes	No	NA	No	NA	11	No	NA	NA	NA
92	Fiorini A.C., Mullally C., Swisher M., Putz F.E.	forest cover effects of payments for ecosystem services: evidence from an impact evaluation in brazil	We evaluate the effects of “Water and Forest Producers” (PAF), a payment for ecosystem services project, on forest cover outcomes in a watershed serving the Rio de Janeiro region of Brazil. We apply propensity score matching and regression to 81 beneficiary properties on 8848 ha and 398 control properties on 33,748 ha. We estimate the average treatment effect on the treated for changes in rates o…	10.1016/j.ecolecon.2019.106522	2020	Latin America	Brazil	Forestry	REDD+	2010	2000	72	NA	192	473282	NA	NA	Rigorous observational study	Linear regressions + matching	Change in forest area (deforestation and reforestation) (%)	OLS	8	0.0154	0.0074	Yes	0.00605011	NA	NA	NA	NA	NA	NA	NA	NA	1	Clustered standard errors	1	Central estimate	Point estimate with uncertainty	No	No	NA	No	NA	9	No	NA	NA	NA
407	Montoya-Zumaeta J.G., Wunder S., Rojas E., Duchelle A.E.	does redd+ complement law enforcement? evaluating impacts of an incipient initiative in madre de dios, peru	Subnational initiatives to Reduce Emissions from Deforestation and forest Degradation and enhance carbon stocks (REDD+) have been implemented across the tropics over the last decade. Such initiatives are often embedded within pre-existing conservation policies, such as forest law enforcement, making it challenging to disentangle attributable impacts. In this article, we analyze a new REDD+ projec…	10.3389/ffgc.2022.870450	2022	Latin America	Peru	Forestry	REDD+	2012	NA	72	NA	72	190	95	95	Rigorous observational study	Difference in-means + matching	Avoided deforestation and forest degradation (ha)	OLS	11	0.33	0.337	Yes	0.15155	NA	NA	NA	NA	NA	NA	0	0	1	Robust standard errors	-1	Central estimate	Point estimate with uncertainty	No	Yes	Negative	No	NA	22	No	NA	NA	NA
407	Montoya-Zumaeta J.G., Wunder S., Rojas E., Duchelle A.E.	does redd+ complement law enforcement? evaluating impacts of an incipient initiative in madre de dios, peru	Subnational initiatives to Reduce Emissions from Deforestation and forest Degradation and enhance carbon stocks (REDD+) have been implemented across the tropics over the last decade. Such initiatives are often embedded within pre-existing conservation policies, such as forest law enforcement, making it challenging to disentangle attributable impacts. In this article, we analyze a new REDD+ projec…	10.3389/ffgc.2022.870450	2022	Latin America	Peru	Forestry	REDD+	2012	NA	72	NA	72	190	95	95	Rigorous observational study	Difference-in-difference + matching	Avoided deforestation and forest degradation (ha)	OLS	11	0.0419	0.133	Yes	0.0487567	NA	NA	NA	NA	NA	NA	0	0	1	Robust standard errors	-1	Central estimate	Point estimate with uncertainty	No	Yes	Negative	No	NA	22	No	NA	NA	NA
689	Sharma B.P., Karky B.S., Nepal M., Pattanayak S.K., Sills E.O., Shyamsundar P.	making incremental progress: impacts of a redd+ pilot initiative in nepal	Reducing emissions from deforestation and forest degradation (REDD+) encompasses a range of incentives for developing countries to slow, halt and reverse forest loss and associated forest carbon emissions. Where there is high dependence on biomass energy, cleaner cooking transitions are key to REDD+'s success. Given the poor track record of efforts to promote clean cooking, more evidence is neede…	10.1088/1748-9326/aba924	2020	Asia	Nepal	Forestry	REDD+	2011	NA	24	NA	24	42	21	21	Rigorous observational study	Difference-in-difference	Firewood (100 loads HH/year)	OLS	6	0.02	0.03	Yes	0.148148	NA	NA	NA	NA	NA	0.62	-0.02	-0.0322581	1	Standard errors	-1	Central estimate	Point estimate with uncertainty	No	No	NA	No	NA	2	No	NA	NA	NA
449	Zhou T., Shen W., Qiu X., Chang H., Yang H., Yang W.	impact evaluation of a payments for ecosystem services program on vegetation quantity and quality restoration in inner mongolia	Globally, the payments for ecosystem services (PES) program has become a helpful tool that serves the purpose of mitigating ecosystem degradation and protecting ecosystem services. However, the ecological effects of existing PES programs based on counterfactual baselines, quantification and sophisticated statistical analyses are still poorly understood. Taking Inner Mongolia as an example, this s…	10.1016/j.jenvman.2021.114113	2022	Asia	Inner Mongolia	Forestry	REDD+	2000	NA	180	NA	180	616	NA	NA	Rigorous observational study	Linear regressions + matching	Change in NDVI –Forest quantity cover recovery	OLS	6	0.028	0.007	Yes	0.322591	NA	NA	NA	NA	NA	NA	NA	NA	1	Standard errors	1	Central estimate	Point estimate with uncertainty	No	No	NA	No	NA	0	No	NA	NA	NA
449	Zhou T., Shen W., Qiu X., Chang H., Yang H., Yang W.	impact evaluation of a payments for ecosystem services program on vegetation quantity and quality restoration in inner mongolia	Globally, the payments for ecosystem services (PES) program has become a helpful tool that serves the purpose of mitigating ecosystem degradation and protecting ecosystem services. However, the ecological effects of existing PES programs based on counterfactual baselines, quantification and sophisticated statistical analyses are still poorly understood. Taking Inner Mongolia as an example, this s…	10.1016/j.jenvman.2021.114113	2022	Asia	Inner Mongolia	Forestry	REDD+	2000	NA	180	NA	180	513	NA	NA	Rigorous observational study	Linear regressions + matching	Change in NDVI – Forest quality recovery	OLS	6	10.739	5.053	Yes	0.187849	NA	NA	NA	NA	NA	NA	NA	NA	1	Standard errors	1	Central estimate	Point estimate with uncertainty	No	No	NA	No	NA	0	No	NA	NA	NA
13	España F., Arriagada R., Melo O., Foster W.	forest plantation subsidies: impact evaluation of the chilean case	Over the past half century there has been a rapid expansion of the forestry sector in Chile. One hypothesis is that this growth was stimulated in major part by government-supported financial incentives to forestry plantations dating from the mid-1970s. Evaluating the effects of subsidies on plantations is of current policy interest due to the potential importance of forests as carbon sinks. This …	10.1016/j.forpol.2022.102696	2022	Latin America	Chile	Forestry	Afforestation/Reforestation	1998	NA	180	NA	180	508	NA	NA	Rigorous observational study	Difference-in-difference + matching	Variation in forest plantation areas [ha]	OLS	8	3.195	0.77	Yes	0.368558	NA	NA	NA	NA	NA	NA	NA	0.13	1	Standard errors	1	Central estimate	Point estimate with uncertainty	No	No	NA	No	NA	0	No	NA	NA	NA
13	España F., Arriagada R., Melo O., Foster W.	forest plantation subsidies: impact evaluation of the chilean case	Over the past half century there has been a rapid expansion of the forestry sector in Chile. One hypothesis is that this growth was stimulated in major part by government-supported financial incentives to forestry plantations dating from the mid-1970s. Evaluating the effects of subsidies on plantations is of current policy interest due to the potential importance of forests as carbon sinks. This …	10.1016/j.forpol.2022.102696	2022	Latin America	Chile	Forestry	Afforestation/Reforestation	1998	NA	180	NA	180	676	NA	NA	Rigorous observational study	Difference-in-difference + matching	Variation in forest plantation areas [ha]	OLS	8	2.911	0.625	Yes	0.358542	NA	NA	NA	NA	NA	NA	NA	0.13	1	Standard errors	1	Central estimate	Point estimate with uncertainty	No	No	NA	No	NA	0	No	NA	NA	NA
971	Fu G., Uchida E., Shah M., Deng X.	impact of the grain for green program on forest cover in china	China’s Grain for Green (GFG) program, one of the world’s largest Payments for Environmental Services programs, has been implemented for more than ten years. However, empirical evidence on its impact on increasing the forest cover is still lacking. The goal of this research is to estimate GFG’s effect on the total forest cover and examine its heterogeneity across four types of forests. To do so, …	10.1080/21606544.2018.1552626	2019	Asia	China	Forestry	REDD+	1995	1988	156	NA	240	383	NA	NA	Rigorous observational study	Difference-in-difference + matching	Change in forest cover (%)	OLS	242	620.6	NA	Yes	0.430707	NA	NA	NA	NA	NA	NA	NA	NA	NA	Standard errors	1	Central estimate	Point estimate with uncertainty	No	No	NA	No	NA	17	No	NA	NA	NA
479	Hayes T., Murtinho F., Wolff H., López-Sandoval M.F., Salazar J.	effectiveness of payment for ecosystem services after loss and uncertainty of compensation	Payment for ecosystem services (PES) programmes seek to promote conservation via payments for desired resource-use behaviours. While PES has been found to produce some ecological and livelihood benefits, an understudied concern is what happens when payments stop. We assess how households’ land-use behaviours changed in response to a temporary gap in payments and subsequent payment uncertainty in …	10.1038/s41893-021-00804-5	2022	Latin America	Ecuador	Forestry	REDD+	2009	2008	84	NA	108	845	NA	NA	Rigorous observational study	Difference-in-difference + matching	Binary indicator whether cows grazed in collective paramo (0/1)	OLS	84	0.198	0.074	Yes	0.185413	NA	NA	NA	NA	NA	NA	NA	-0.2	NA	Clustered standard errors	-1	Central estimate	Point estimate with uncertainty	Yes	No	NA	No	NA	11	No	NA	NA	NA
479	Hayes T., Murtinho F., Wolff H., López-Sandoval M.F., Salazar J.	effectiveness of payment for ecosystem services after loss and uncertainty of compensation	Payment for ecosystem services (PES) programmes seek to promote conservation via payments for desired resource-use behaviours. While PES has been found to produce some ecological and livelihood benefits, an understudied concern is what happens when payments stop. We assess how households’ land-use behaviours changed in response to a temporary gap in payments and subsequent payment uncertainty in …	10.1038/s41893-021-00804-5	2022	Latin America	Ecuador	Forestry	REDD+	2009	2008	84	NA	108	780	NA	NA	Rigorous observational study	Difference-in-difference + matching	Binary indicator whether cows grazed in collective paramo (0/1)	OLS	84	0.116	0.022	Yes	0.380526	NA	NA	NA	NA	NA	NA	NA	-0.2	NA	Clustered standard errors	-1	Central estimate	Point estimate with uncertainty	Yes	No	NA	No	NA	11	No	NA	NA	NA
1000002	Linkie M., Smith, R., Zhu Y., Martyr, D., et al	Evaluating Biodiversity Conservation around a Large Sumatran Protected Area	Many of the large, donor-funded community-based conservation projects that seek to reduce bio- diversity loss in the tropics have been unsuccessful. There is, therefore, a need for empirical evaluations to identify the driving factors and to provide evidence that supports the development of context-specific conser- vation projects. We used a quantitative approach to measure, post hoc, the effecti…	10.1111/j.1523-1739.2008.00906.x	2007	Asia	Indonesia	Forestry	REDD+	1997	1995	60	NA	84	130	65	65	Rigorous observational study	Logistic regression + matching	Deforestation (ha) – not specified in study	NA	688	0.036	0.068	Yes	0.0974726	NA	NA	NA	NA	NA	NA	NA	0	NA	NA	1	Central estimate	Point estimate with uncertainty	No	No	NA	No	NA	NA	No	NA	NA	NA
1000002	Linkie M., Smith, R., Zhu Y., Martyr, D., et al	Evaluating Biodiversity Conservation around a Large Sumatran Protected Area	Many of the large, donor-funded community-based conservation projects that seek to reduce bio- diversity loss in the tropics have been unsuccessful. There is, therefore, a need for empirical evaluations to identify the driving factors and to provide evidence that supports the development of context-specific conser- vation projects. We used a quantitative approach to measure, post hoc, the effecti…	10.1111/j.1523-1739.2008.00906.x	2007	Asia	Indonesia	Forestry	REDD+	1997	1995	60	NA	84	352	65	287	Rigorous observational study	Logistic regression + matching	Deforestation (ha) – not specified in study	NA	688	0.034	0.055	Yes	0.0670512	NA	NA	NA	NA	NA	NA	NA	0	NA	NA	1	Central estimate	Point estimate with uncertainty	No	No	NA	No	NA	NA	No	NA	NA	NA
22	Erbaugh J.T.	impermanence and failure: the legacy of conservation-based payments in sumatra, indonesia	Projects that pay communities or individuals to conserve natural areas rarely continue indefinitely. When payments cease, the behaviors they motivate can change. Previous research on conservation-based payments recognizes the impermanence of conservation success, but it does not consider the legacy of payments that failed to effect change. This research assesses impermanence and failure by invest…	10.1088/1748-9326/ac6437	2022	Asia	Indonesia	Forestry	REDD+	2000	NA	192	156	192	268	204	64	Rigorous observational study	Multiple	Forest cover loss (%)	Multiple	6	NA	NA	NA	NA	NA	NA	NA	NA	NA	NA	0.252	0.252	1	NA	1	Central estimate	Point estimate with uncertainty	Yes	No	NA	No	NA	NA	No	NA	NA	NA
157	Cuenca P., Robalino J., Arriagada R., Echeverría C.	are government incentives effective for avoided deforestation in the tropical andean forest?	In order to ensure the provision of goods and services from forests, many governments have promoted less-traditional conservation initiatives such as programs of payments for ecosystem services called, more broadly, direct payments for conservation. The Socio Bosque Program (SBP) is a governmental program in Ecuador that directly provides economic incentives to rural families and local and indige…	10.1371/journal.pone.0203545	2018	Latin America	Ecuador	Forestry	REDD+	2008	NA	72	NA	72	290489	30439	260050	Rigorous observational study	Linear regressions + matching	Deforestation (% of cells deforested 2008-2014)	OLS	6	0.015	NA	Yes	0.0135782	NA	NA	NA	NA	NA	NA	NA	NA	1	Standard errors	-1	Lower bound	Only point estimate	No	No	NA	No	NA	NA	No	NA	NA	NA
157	Cuenca P., Robalino J., Arriagada R., Echeverría C.	are government incentives effective for avoided deforestation in the tropical andean forest?	In order to ensure the provision of goods and services from forests, many governments have promoted less-traditional conservation initiatives such as programs of payments for ecosystem services called, more broadly, direct payments for conservation. The Socio Bosque Program (SBP) is a governmental program in Ecuador that directly provides economic incentives to rural families and local and indige…	10.1371/journal.pone.0203545	2018	Latin America	Ecuador	Forestry	REDD+	2008	NA	72	NA	72	290489	30439	260050	Rigorous observational study	Linear regressions + matching	Deforestation (% of cells deforested 2008-2014)	OLS	6	0.0137	NA	Yes	0.0135782	NA	NA	NA	NA	NA	NA	NA	NA	1	Standard errors	-1	Lower bound	Only point estimate	No	No	NA	No	NA	NA	No	NA	NA	NA
2586	Badgley G., Freeman J., Hamman J.J., Haya B., Trugman A.T., Anderegg W.R.L., Cullenward D.	systematic over-crediting in california's forest carbon offsets program	Carbon offsets are widely used by individuals, corporations, and governments to mitigate their greenhouse gas emissions on the assumption that offsets reflect equivalent climate benefits achieved elsewhere. These climate-equivalence claims depend on offsets providing real and additional climate benefits beyond what would have happened, counterfactually, without the offsets project. Here, we evalu…	10.1111/gcb.15943	2021	Northern America	United States of America	Forestry	IFM	2012	NA	NA	NA	84	72	NA	NA	Rigorous observational study	Comparison coarse baseline vs. ecologically-grounded baseline	Crediting error (%)	Difference in means	8	NA	NA	NA	NA	NA	NA	NA	NA	NA	NA	NA	NA	1	Confidence interval	-1	Central estimate	Point estimate with uncertainty	No	No	NA	No	NA	NA	Yes	0.706	Upper bound	72
2586	Badgley G., Freeman J., Hamman J.J., Haya B., Trugman A.T., Anderegg W.R.L., Cullenward D.	systematic over-crediting in california's forest carbon offsets program	Carbon offsets are widely used by individuals, corporations, and governments to mitigate their greenhouse gas emissions on the assumption that offsets reflect equivalent climate benefits achieved elsewhere. These climate-equivalence claims depend on offsets providing real and additional climate benefits beyond what would have happened, counterfactually, without the offsets project. Here, we evalu…	10.1111/gcb.15943	2021	Northern America	United States of America	Forestry	IFM	2012	NA	NA	NA	84	72	NA	NA	Rigorous observational study	Comparison coarse baseline vs. ecologically-grounded baseline	Crediting error (%)	Difference in means	8	NA	NA	NA	NA	NA	NA	NA	NA	NA	NA	NA	NA	1	Confidence interval	-1	Upper bound	Point estimate with uncertainty	No	No	NA	No	NA	NA	Yes	0.799	Upper bound	72
2586	Badgley G., Freeman J., Hamman J.J., Haya B., Trugman A.T., Anderegg W.R.L., Cullenward D.	systematic over-crediting in california's forest carbon offsets program	Carbon offsets are widely used by individuals, corporations, and governments to mitigate their greenhouse gas emissions on the assumption that offsets reflect equivalent climate benefits achieved elsewhere. These climate-equivalence claims depend on offsets providing real and additional climate benefits beyond what would have happened, counterfactually, without the offsets project. Here, we evalu…	10.1111/gcb.15943	2021	Northern America	United States of America	Forestry	IFM	2012	NA	NA	NA	84	72	NA	NA	Rigorous observational study	Comparison coarse baseline vs. ecologically-grounded baseline	Crediting error (%)	Difference in means	8	NA	NA	NA	NA	NA	NA	NA	NA	NA	NA	NA	NA	1	Confidence interval	-1	Lower bound	Point estimate with uncertainty	No	No	NA	No	NA	NA	Yes	0.622	Upper bound	72
1150	Ludwinski D., Moriarty K., Wydick B.	environmental and health impacts from the introduction of improved wood stoves: evidence from a field experiment in guatemala	Improved wood-burning stoves offer a possible solution that can simultaneously impact both problems of deforestation and problems of respiratory health in developing countries. We carried out a field experiment in which new fuel-efficient woodstoves were allocated in a Guatemalan village via the use of a lottery. A 2008 baseline survey was carried out on 2,148 individuals in 351 households, and t…	10.1007/s10668-011-9282-z	2011	Latin America	Guatemala	Household	Cookstoves	2008	2008	4	NA	12	83	38	45	Experimental	RCT	daily wood consumption (cargas/day)	Fixed effects	667	0.402	0.0787	1	0	NA	NA	NA	NA	0.679	0.277	-0.592047	-0.592047	1	clustered standard errors	-1	Central	‘Point estimate with uncertainty’	No	Yes	Positive	No	NA	1	No	NA	NA	NA
1150	Ludwinski D., Moriarty K., Wydick B.	environmental and health impacts from the introduction of improved wood stoves: evidence from a field experiment in guatemala	Improved wood-burning stoves offer a possible solution that can simultaneously impact both problems of deforestation and problems of respiratory health in developing countries. We carried out a field experiment in which new fuel-efficient woodstoves were allocated in a Guatemalan village via the use of a lottery. A 2008 baseline survey was carried out on 2,148 individuals in 351 households, and t…	10.1007/s10668-011-9282-z	2011	Latin America	Guatemala	Household	Cookstoves	2008	2008	4	NA	12	83	38	45	Experimental	RCT	daily wood consumption (cargas/day)	Fixed effects	667	0.249	0.0621	1	0	NA	NA	NA	NA	0.679	0.43	-0.366716	-0.366716	1	clustered standard errors	-1	Central	‘Point estimate with uncertainty’	No	Yes	Positive	No	NA	3	No	NA	NA	NA
1000003	Chan and Huenteler	Financing Wind Energy Deployment in China through the Clean Development Mechanism	NA	NA	2015	Asia	China	Renewable Energy	Wind	2007	NA	60	NA	60	2051	1494	557	Rigorous observational study	Financial modelling	Internal Rate of Return (IRR) calculation	Kolmogorov-Smirnov test for the difference in distributions	165	NA	NA	NA	NA	NA	NA	NA	0.024	NA	NA	NA	NA	1	NA	NA	Point estimate	Only point estimate	No	No	NA	No	NA	NA	Yes	0	Central estimate	1494
1000004	Calel et al	Do Carbon Offsets Offset Carbon?	NA	NA	2021	Asia	India	Renewable Energy	Wind	1992	NA	252	NA	252	1350	472	878	Rigorous observational study	Blatantly inframarginal projects methodology developed in the paper	BLIMP fraction (%)	NA	19	NA	NA	NA	NA	NA	NA	NA	NA	NA	NA	NA	NA	1	NA	NA	Upper bound	Only point estimate	No	No	NA	No	NA		Yes	0.48	Upper bound	472
1000005	Gillenwater et al	Additionality of wind energy investments in the U.S. voluntary green power market	NA	NA	2013	North America	United States of America	Renewable Energy	Wind	2004	NA	72	NA	72	248	NA	NA	Rigorous observational study	Financial modelling	Net Present Value (NPV) calculation	NA	456	NA	NA	NA	NA	NA	NA	NA	NA	NA	NA	0	0	1	NA	NA	No point estimate	No point estimate	No	No	NA	No	NA		No	NA	NA	NA
1182	Schneider, L; Kollmuss, A	perverse effects of carbon markets on hfc-23 and sf6 abatement projects in russia	Carbon markets are considered a key policy tool to achieve cost-effective climate mitigation(1,2). Project-based carbon market mechanisms allow private sector entities to earn tradable emissions reduction credits from mitigation projects. The environmental integrity of project-based mechanisms has been subject to controversial debate and extensive research(1,3-9), in particular for projects abati…	10.1038/nclimate2772	2015	Europe	Russia	Chemical processes	Ozone depleting substances	2008	1990	60	NA	276	5	5	0	Rigorous observational study	Before-after comparison	HFC-23 and SF6 waste generation per day (metric tonnes)	NA	1062	NA	NA	NA	NA	NA	NA	NA	NA	NA	NA	NA	NA	1	NA	NA	No point estimate	No uncertainty	NA	NA	NA	No	NA	NA	Yes	0.3	Central estimate	5
1182	Schneider, L; Kollmuss, A	perverse effects of carbon markets on hfc-23 and sf6 abatement projects in russia	Carbon markets are considered a key policy tool to achieve cost-effective climate mitigation(1,2). Project-based carbon market mechanisms allow private sector entities to earn tradable emissions reduction credits from mitigation projects. The environmental integrity of project-based mechanisms has been subject to controversial debate and extensive research(1,3-9), in particular for projects abati…	10.1038/nclimate2772	2015	Europe	Russia	Chemical processes	Ozone depleting substances	2008	1990	60	NA	276	5	5	0	Rigorous observational study	Before-after comparison	HFC-23 and SF6 waste generation per day (metric tonnes)	NA	1062	NA	NA	NA	NA	NA	NA	NA	NA	NA	NA	NA	NA	1	NA	NA	No point estimate	No uncertainty	NA	NA	NA	No	NA	NA	Yes	0.38	Central estimate	5
1182	Schneider, L; Kollmuss, A	perverse effects of carbon markets on hfc-23 and sf6 abatement projects in russia	Carbon markets are considered a key policy tool to achieve cost-effective climate mitigation(1,2). Project-based carbon market mechanisms allow private sector entities to earn tradable emissions reduction credits from mitigation projects. The environmental integrity of project-based mechanisms has been subject to controversial debate and extensive research(1,3-9), in particular for projects abati…	10.1038/nclimate2772	2015	Europe	Russia	Chemical processes	Ozone depleting substances	2008	1990	60	NA	276	5	5	0	Rigorous observational study	Before-after comparison	HFC-23 and SF6 waste generation per day (metric tonnes)	NA	1062	NA	NA	NA	NA	NA	NA	NA	NA	NA	NA	NA	NA	1	NA	NA	No point estimate	No uncertainty	NA	NA	NA	No	NA	NA	Yes	0.39	Central estimate	5
1182	Schneider, L; Kollmuss, A	perverse effects of carbon markets on hfc-23 and sf6 abatement projects in russia	Carbon markets are considered a key policy tool to achieve cost-effective climate mitigation(1,2). Project-based carbon market mechanisms allow private sector entities to earn tradable emissions reduction credits from mitigation projects. The environmental integrity of project-based mechanisms has been subject to controversial debate and extensive research(1,3-9), in particular for projects abati…	10.1038/nclimate2772	2015	Europe	Russia	Chemical processes	Ozone depleting substances	2008	1990	60	NA	276	5	5	0	Rigorous observational study	Before-after comparison	HFC-23 and SF6 waste generation per day (metric tonnes)	NA	1062	NA	NA	NA	NA	NA	NA	NA	NA	NA	NA	NA	NA	1	NA	NA	No point estimate	No uncertainty	NA	NA	NA	No	NA	NA	Yes	0.01	Central estimate	5
1182	Schneider, L; Kollmuss, A	perverse effects of carbon markets on hfc-23 and sf6 abatement projects in russia	Carbon markets are considered a key policy tool to achieve cost-effective climate mitigation(1,2). Project-based carbon market mechanisms allow private sector entities to earn tradable emissions reduction credits from mitigation projects. The environmental integrity of project-based mechanisms has been subject to controversial debate and extensive research(1,3-9), in particular for projects abati…	10.1038/nclimate2772	2015	Europe	Russia	Chemical processes	Ozone depleting substances	2008	1990	60	NA	276	5	5	0	Rigorous observational study	Before-after comparison	HFC-23 and SF6 waste generation per day (metric tonnes)	NA	1062	NA	NA	NA	NA	NA	NA	NA	NA	NA	NA	NA	NA	1	NA	NA	No point estimate	No uncertainty	NA	NA	NA	No	NA	NA	Yes	0.13	Central estimate	5
1182	Schneider, L; Kollmuss, A	perverse effects of carbon markets on hfc-23 and sf6 abatement projects in russia	Carbon markets are considered a key policy tool to achieve cost-effective climate mitigation(1,2). Project-based carbon market mechanisms allow private sector entities to earn tradable emissions reduction credits from mitigation projects. The environmental integrity of project-based mechanisms has been subject to controversial debate and extensive research(1,3-9), in particular for projects abati…	10.1038/nclimate2772	2015	Europe	Russia	Chemical processes	Ozone depleting substances	2008	1990	60	NA	276	5	5	0	Rigorous observational study	Before-after comparison	HFC-23 and SF6 waste generation per day (metric tonnes)	NA	1062	NA	NA	NA	NA	NA	NA	NA	NA	NA	NA	NA	NA	1	NA	NA	No point estimate	No uncertainty	NA	NA	NA	No	NA	NA	Yes	0.25	Central estimate	5
1687	Schneider, LR	perverse incentives under the cdm: an evaluation of hfc-23 destruction projects	The clean development mechanism (CDM) under the Kyoto Protocol allows industrialized countries to use credits from greenhouse gas (GHG) abatement projects in developing countries. A key requirement of the CDM is that the emission reductions be real, measurable and additional. This article uses data from registered projects to evaluate the extent to which these objectives are met by projects that …	10.3763/cpol.2010.0096	2011	Multiple	Multiple	Chemical processes	Ozone depleting substances	2007	2000	24	NA	24	2	2	NA	Rigorous observational study	Before-after comparison	HFC-23 and SF6 waste generation per day (metric tonnes)	NA	856	NA	NA	NA	NA	NA	NA	NA	NA	NA	NA	NA	NA	1	NA	NA	No point estimate	No uncertainty	NA	NA	NA	No	NA	NA	Yes	0.269565	Central estimate	2
1687	Schneider, LR	perverse incentives under the cdm: an evaluation of hfc-23 destruction projects	The clean development mechanism (CDM) under the Kyoto Protocol allows industrialized countries to use credits from greenhouse gas (GHG) abatement projects in developing countries. A key requirement of the CDM is that the emission reductions be real, measurable and additional. This article uses data from registered projects to evaluate the extent to which these objectives are met by projects that …	10.3763/cpol.2010.0096	2011	Multiple	Multiple	Chemical processes	Ozone depleting substances	2007	2000	24	NA	24	2	2	NA	Rigorous observational study	Before-after comparison	HFC-23 and SF6 waste generation per day (metric tonnes)	NA	856	NA	NA	NA	NA	NA	NA	NA	NA	NA	NA	NA	NA	1	NA	NA	No point estimate	No uncertainty	NA	NA	NA	No	NA	NA	Yes	0.439815	Central estimate	2
1150	Ludwinski D., Moriarty K., Wydick B.	environmental and health impacts from the introduction of improved wood stoves: evidence from a field experiment in guatemala	Improved wood-burning stoves offer a possible solution that can simultaneously impact both problems of deforestation and problems of respiratory health in developing countries. We carried out a field experiment in which new fuel-efficient woodstoves were allocated in a Guatemalan village via the use of a lottery. A 2008 baseline survey was carried out on 2,148 individuals in 351 households, and t…	10.1007/s10668-011-9282-z	2011	Latin America	Guatemala	Household	Cookstoves	2008	2008	4	NA	12	83	38	45	Experimental	RCT	daily wood consumption (cargas/day)	Fixed effects	667	0.402	0.0787	1	0.876016	NA	NA	NA	NA	0.679	0.277	-0.592047	-0.592047	1	clustered standard errors	-1	Central	‘Point estimate with uncertainty’	No	Yes	Positive	No	NA	1	No	NA	NA	NA
1150	Ludwinski D., Moriarty K., Wydick B.	environmental and health impacts from the introduction of improved wood stoves: evidence from a field experiment in guatemala	Improved wood-burning stoves offer a possible solution that can simultaneously impact both problems of deforestation and problems of respiratory health in developing countries. We carried out a field experiment in which new fuel-efficient woodstoves were allocated in a Guatemalan village via the use of a lottery. A 2008 baseline survey was carried out on 2,148 individuals in 351 households, and t…	10.1007/s10668-011-9282-z	2011	Latin America	Guatemala	Household	Cookstoves	2008	2008	4	NA	12	83	38	45	Experimental	RCT	daily wood consumption (cargas/day)	Fixed effects	667	0.249	0.0621	1	0.706062	NA	NA	NA	NA	0.679	0.43	-0.366716	-0.366716	1	clustered standard errors	-1	Central	‘Point estimate with uncertainty’	No	Yes	Positive	No	NA	3	No	NA	NA	NA
256	Jeuland M.A., Pattanayak S.K., Samaddar S., Shah R., Vora M.	adoption and impacts of improved biomass cookstoves in rural rajasthan	Biomass-burning improved cookstoves (ICS) are often seen as a promising intermediate technology solution along the path of household transition to cleaner cooking. This study reports on the results of an experimental evaluation of a carbon finance-enabled program conducted in rural villages in Rajasthan, India. Half (or 20) of 40 purposively-selected treatment villages were randomly assigned to a…	10.1016/j.esd.2020.06.006	2020	Asia	India	Household	Cookstoves	2015	2013	36	NA	48	580	293	287	Experimental	RCT	daily wood consumption (kg/day)	OLS	156	0.38	0.35	1	0.0915962	NA	NA	NA	NA	11.9	12.28	0.0319328	0.0319328	1	clustered standard errors	1	Central	‘Point estimate with uncertainty’	No	Yes	Positive	No	NA	17	No	NA	NA	NA
256	Jeuland M.A., Pattanayak S.K., Samaddar S., Shah R., Vora M.	adoption and impacts of improved biomass cookstoves in rural rajasthan	Biomass-burning improved cookstoves (ICS) are often seen as a promising intermediate technology solution along the path of household transition to cleaner cooking. This study reports on the results of an experimental evaluation of a carbon finance-enabled program conducted in rural villages in Rajasthan, India. Half (or 20) of 40 purposively-selected treatment villages were randomly assigned to a…	10.1016/j.esd.2020.06.008	2020	Asia	India	Household	Cookstoves	2015	2013	36	NA	48	580	293	287	Experimental	RCT	daily wood consumption (kg/day)	OLS	156	0.44	0.58	1	0.0448974	NA	NA	NA	NA	11.9	12.34	0.0369748	0.0369748	1	clustered standard errors	1	Central	‘Point estimate with uncertainty’	No	Yes	Positive	No	NA	17	No	NA	NA	NA
256	Jeuland M.A., Pattanayak S.K., Samaddar S., Shah R., Vora M.	adoption and impacts of improved biomass cookstoves in rural rajasthan	Biomass-burning improved cookstoves (ICS) are often seen as a promising intermediate technology solution along the path of household transition to cleaner cooking. This study reports on the results of an experimental evaluation of a carbon finance-enabled program conducted in rural villages in Rajasthan, India. Half (or 20) of 40 purposively-selected treatment villages were randomly assigned to a…	10.1016/j.esd.2020.06.010	2020	Asia	India	Household	Cookstoves	2015	2013	36	NA	48	580	293	287	Experimental	RCT	daily wood consumption (kg/day)	OLS	156	0.82	0.75	1	0.092239	NA	NA	NA	NA	11.9	12.72	0.0689076	0.0689076	1	clustered standard errors	1	Central	‘Point estimate with uncertainty’	No	Yes	Positive	No	NA	17	No	NA	NA	NA
761	Brooks N., Bhojvaid V., Jeuland M.A., Lewis J.J., Patange O., Pattanayak S.K.	how much do alternative cookstoves reduce biomass fuel use? evidence from north india	Despite widespread global efforts to promote clean cookstoves to achieve improvements in air and forest quality, and to reduce global climate change, surprisingly little is known about the degree to which these actually reduce biomass fuel consumption in real-world settings. Using data from in-house weighing of fuel conducted in rural India, we examine the impact of cleaner cookstoves - most of w…	10.1016/j.reseneeco.2015.12.001	2016	Asia	India	Household	Cookstoves	2012	NA	24-hours	NA	24-hours	991	991	991	Rigorous observational study	Heckman two stage model	daily wood consumption (kg/day)	Heckman	165	4.5	1.5	1	0.193851	NA	NA	NA	NA	9.3	4.8	-0.483871	-0.384025	0.793651	Standard errors	-1	Central	‘Point estimate with uncertainty’	No	Yes	Positive	No	NA	32	No	NA	NA	NA
1023	Adrianzen, A.	improved cooking stoves and firewood consumption: quasi-experimental evidence from the northern peruvian andes	Over the past few decades, improved firewood cooking stoves have been massively distributed around the world, mainly with the purpose of decreasing fuelwood consumption among rural households. Surprisingly, rigorous "on the field" evidence on the causal impact of these devices is very limited. This paper estimates the impact of an improved stove design distributed in the Northern Peruvian Andes o…	10.1016/j.ecolecon.2013.02.010	2013	Latin America	Peru	Household	Cookstoves	2003	NA	60	NA	60	194	162	32	Rigorous-observational	IV	natural log of monthly firewood consumption	IV	141	0.36	0.19	1	0.283239	NA	NA	NA	NA	NA	NA	-0.433329	-0.181998	0.42	clustered standard errors	-1	Central	‘Point estimate with uncertainty’	No	No	NA	No	NA	14	No	NA	NA	NA
1023	Adrianzen, A.	improved cooking stoves and firewood consumption: quasi-experimental evidence from the northern peruvian andes	Over the past few decades, improved firewood cooking stoves have been massively distributed around the world, mainly with the purpose of decreasing fuelwood consumption among rural households. Surprisingly, rigorous "on the field" evidence on the causal impact of these devices is very limited. This paper estimates the impact of an improved stove design distributed in the Northern Peruvian Andes o…	10.1016/j.ecolecon.2013.02.010	2013	Latin America	Peru	Household	Cookstoves	2003	NA	60	NA	60	194	162	32	Rigorous-observational	IV	natural log of monthly firewood consumption	IV	141	0.4	0.19	1	0.334971	NA	NA	NA	NA	NA	NA	-0.491825	-0.206566	0.42	clustered standard errors	-1	Central	‘Point estimate with uncertainty’	No	No	NA	No	NA	14	No	NA	NA	NA
1000006	Mekonen, A., Beyene, A., Bluffstone, R., Gebreegziabher, Z., Martinsson, P., Toman, M., Vieder, F.	Do improved biomass cookstoves reduce fuelwood consumption and carbon emissions? Evidence from a field experiment in rural Ethiopia	Using a randomized experimental design, real-time electronic stove surface temperature measurements and controlled cooking tests, we estimate fuelwood and CO2 savings from an improved cookstove (ICS) program in rural Ethiopia. Cooking uses a majority of the fuelwood in the country and therefore is a critical determinant of greenhouse gas emissions. Estimating fuelwood savings is therefore a key a…	10.1016/j.ecolecon.2022.107467	2022	Africa	Ethiopia	Household	Cookstoves	2013	2012	13	NA	25	504	360	144	Experimental	RCT	weekly wood consumption (kg/week)	OLS	7	5.22	NA	0	NA	NA	NA	NA	NA	100.212	94.9917	-0.0520897	-0.0520897	1	clustered standard errors	-1	Central	‘Point estimate with uncertainty’	No	No	NA	No	NA	18	No	NA	NA	NA
1000006	Mekonen, A., Beyene, A., Bluffstone, R., Gebreegziabher, Z., Martinsson, P., Toman, M., Vieder, F.	Do improved biomass cookstoves reduce fuelwood consumption and carbon emissions? Evidence from a field experiment in rural Ethiopia	Using a randomized experimental design, real-time electronic stove surface temperature measurements and controlled cooking tests, we estimate fuelwood and CO2 savings from an improved cookstove (ICS) program in rural Ethiopia. Cooking uses a majority of the fuelwood in the country and therefore is a critical determinant of greenhouse gas emissions. Estimating fuelwood savings is therefore a key a…	10.1016/j.ecolecon.2022.107468	2022	Africa	Ethiopia	Household	Cookstoves	2013	2012	13	NA	25	504	360	144	Experimental	RCT	weekly wood consumption (kg/week)	OLS	7	12.12	NA	0	NA	NA	NA	NA	NA	100.212	88.0917	-0.120944	-0.120944	1	clustered standard errors	-1	Central	‘Point estimate with uncertainty’	No	No	NA	No	NA	18	No	NA	NA	NA
1000006	Mekonen, A., Beyene, A., Bluffstone, R., Gebreegziabher, Z., Martinsson, P., Toman, M., Vieder, F.	Do improved biomass cookstoves reduce fuelwood consumption and carbon emissions? Evidence from a field experiment in rural Ethiopia	Using a randomized experimental design, real-time electronic stove surface temperature measurements and controlled cooking tests, we estimate fuelwood and CO2 savings from an improved cookstove (ICS) program in rural Ethiopia. Cooking uses a majority of the fuelwood in the country and therefore is a critical determinant of greenhouse gas emissions. Estimating fuelwood savings is therefore a key a…	10.1016/j.ecolecon.2022.107469	2022	Africa	Ethiopia	Household	Cookstoves	2013	2012	13	NA	25	504	360	144	Experimental	RCT	weekly wood consumption (kg/week)	OLS	7	12.18	NA	0	NA	NA	NA	NA	NA	100.212	88.0317	-0.121543	-0.121543	1	clustered standard errors	-1	Central	‘Point estimate with uncertainty’	No	No	NA	No	NA	18	No	NA	NA	NA
1000006	Mekonen, A., Beyene, A., Bluffstone, R., Gebreegziabher, Z., Martinsson, P., Toman, M., Vieder, F.	Do improved biomass cookstoves reduce fuelwood consumption and carbon emissions? Evidence from a field experiment in rural Ethiopia	Using a randomized experimental design, real-time electronic stove surface temperature measurements and controlled cooking tests, we estimate fuelwood and CO2 savings from an improved cookstove (ICS) program in rural Ethiopia. Cooking uses a majority of the fuelwood in the country and therefore is a critical determinant of greenhouse gas emissions. Estimating fuelwood savings is therefore a key a…	10.1016/j.ecolecon.2022.107470	2022	Africa	Ethiopia	Household	Cookstoves	2013	2012	13	NA	25	504	360	144	Experimental	RCT	weekly wood consumption (kg/week)	OLS	7	12.4	NA	0	NA	NA	NA	NA	NA	100.212	87.8117	-0.123738	-0.123738	1	clustered standard errors	-1	Central	‘Point estimate with uncertainty’	No	No	NA	No	NA	18	No	NA	NA	NA
780	Hanna R., Duflo E., Greenstone M.	up in smoke: the influence of household behavior on the long-run impact of improved cooking stoves	Laboratory studies suggest that improved cooking stoves can reduce indoor air pollution, improve health, and decrease greenhouse gas emissions in developing countries. We provide evidence, from a large-scale randomized trial in India, on the benefits of a common, laboratory-validated stove with a four-year follow-up. While smoke inhalation initially falls, this effect disappears by year two. We f…	10.1257/pol.20140008	2016	Asia	India	Household	Cookstoves	2006	2006	48	NA	56	5619	2600	3019	Experimental	RCT	total wood used at last meal (kg)	OLS	105	0.022	0.179	1	0.00328009	NA	NA	NA	NA	3.373	3.351	-0.00652238	-0.00652238	1	clustered standard errors	-1	Central	‘Point estimate with uncertainty’	No	Yes	Neutral	No	NA	Could not find any, nor in formulas	No	NA	NA	NA
780	Hanna R., Duflo E., Greenstone M.	up in smoke: the influence of household behavior on the long-run impact of improved cooking stoves	Laboratory studies suggest that improved cooking stoves can reduce indoor air pollution, improve health, and decrease greenhouse gas emissions in developing countries. We provide evidence, from a large-scale randomized trial in India, on the benefits of a common, laboratory-validated stove with a four-year follow-up. While smoke inhalation initially falls, this effect disappears by year two. We f…	10.1257/pol.20140008	2016	Asia	India	Household	Cookstoves	2006	2006	48	NA	56	5619	2600	3019	Experimental	RCT	total wood used at last meal (kg)	OLS	105	0.156	0.168	1	0.0247817	NA	NA	NA	NA	3.373	3.529	0.0462496	0.0462496	1	clustered standard errors	1	Central	‘Point estimate with uncertainty’	No	Yes	Neutral	No	NA	Could not find any, nor in formulas	No	NA	NA	NA
780	Hanna R., Duflo E., Greenstone M.	up in smoke: the influence of household behavior on the long-run impact of improved cooking stoves	Laboratory studies suggest that improved cooking stoves can reduce indoor air pollution, improve health, and decrease greenhouse gas emissions in developing countries. We provide evidence, from a large-scale randomized trial in India, on the benefits of a common, laboratory-validated stove with a four-year follow-up. While smoke inhalation initially falls, this effect disappears by year two. We f…	10.1257/pol.20140008	2016	Asia	India	Household	Cookstoves	2006	2006	48	NA	56	5619	2600	3019	Experimental	RCT	total wood used at last meal (kg)	OLS	105	0.235	0.249	1	0.0251875	NA	NA	NA	NA	3.373	3.608	0.0696709	0.0696709	1	clustered standard errors	1	Central	‘Point estimate with uncertainty’	No	Yes	Neutral	No	NA	Could not find any, nor in formulas	No	NA	NA	NA
780	Hanna R., Duflo E., Greenstone M.	up in smoke: the influence of household behavior on the long-run impact of improved cooking stoves	Laboratory studies suggest that improved cooking stoves can reduce indoor air pollution, improve health, and decrease greenhouse gas emissions in developing countries. We provide evidence, from a large-scale randomized trial in India, on the benefits of a common, laboratory-validated stove with a four-year follow-up. While smoke inhalation initially falls, this effect disappears by year two. We f…	10.1257/pol.20140008	2016	Asia	India	Household	Cookstoves	2006	2006	48	NA	56	5619	2600	3019	Experimental	RCT	total wood used at last meal (kg)	OLS	105	0.18	0.285	1	0.0168556	NA	NA	NA	NA	3.373	3.193	-0.053365	-0.053365	1	clustered standard errors	-1	Central	‘Point estimate with uncertainty’	No	Yes	Neutral	No	NA	Could not find any, nor in formulas	No	NA	NA	NA
1022	Beltramo T., Levine D.I.	the effect of solar ovens on fuel use, emissions and health: results from a randomised controlled trial	Inefficient cookstoves contribute to deforestation and global climate change, require substantial time (usually of women and girls) collecting wood or money for fuel and lead to just under two million deaths a year. We examined the effect of solar ovens on fuel use, time spent collecting wood, carbon monoxide exposure, and respiratory illness symptoms. A phased randomised controlled trial was run…	10.1080/19439342.2013.775175	2013	Africa	Senegal	Household	Cookstoves	2008	2008	6	NA	6	659	465	194	Experimental	RCT	total wood used yesterday (kg)	OLS	193	0.2	0.72	1	0.021875	NA	NA	NA	NA	10.19	10.39	0.0196271	0.0196271	1	regular standard errors	1	Central	‘Point estimate with uncertainty’	No	Yes	Neutral	No	NA	8	No	NA	NA	NA
1022	Beltramo T., Levine D.I.	the effect of solar ovens on fuel use, emissions and health: results from a randomised controlled trial	Inefficient cookstoves contribute to deforestation and global climate change, require substantial time (usually of women and girls) collecting wood or money for fuel and lead to just under two million deaths a year. We examined the effect of solar ovens on fuel use, time spent collecting wood, carbon monoxide exposure, and respiratory illness symptoms. A phased randomised controlled trial was run…	10.1080/19439342.2013.775176	2013	Africa	Senegal	Household	Cookstoves	2008	2008	6	NA	6	659	465	194	Experimental	RCT	total wood used yesterday (kg)	OLS	193	1.43	0.48	1	0.234609	NA	NA	NA	NA	10.19	8.76	-0.140334	-0.140334	1	regular standard errors	-1	Central	‘Point estimate with uncertainty’	No	Yes	Neutral	No	NA	8	No	NA	NA	NA
1022	Beltramo T., Levine D.I.	the effect of solar ovens on fuel use, emissions and health: results from a randomised controlled trial	Inefficient cookstoves contribute to deforestation and global climate change, require substantial time (usually of women and girls) collecting wood or money for fuel and lead to just under two million deaths a year. We examined the effect of solar ovens on fuel use, time spent collecting wood, carbon monoxide exposure, and respiratory illness symptoms. A phased randomised controlled trial was run…	10.1080/19439342.2013.775177	2013	Africa	Senegal	Household	Cookstoves	2008	2008	6	NA	6	659	465	194	Experimental	RCT	total wood used yesterday (kg)	OLS	193	0.09	0.54	1	0.013125	NA	NA	NA	NA	10.19	10.1	-0.00883219	-0.00883219	1	regular standard errors	-1	Central	‘Point estimate with uncertainty’	No	Yes	Neutral	No	NA	8	No	NA	NA	NA
1000007	Bensch G., Peters J.	The intensive margin of technology adoption – Experimental evidence on improved cooking stoves in rural Senegal	Today, almost 3 billion people in developing countries rely on biomass as primary cooking fuel, with profound negative implications for their well-being. Improved biomass cooking stoves are alleged to counteract these adverse effects. This paper evaluates take-up and impacts of low-cost improved stoves through a randomized controlled trial. The randomized stove is primarily designed to curb firew…	10.1016/j.jhealeco.2015.03.006	2015	Africa	Senegal	Household	Cookstoves	2009	NA	36	NA	36	228	90	138	Experimental	RCT	firewood consumption per week (kg)	OLS	51	26.78	6.33	1	0.575718	NA	NA	NA	NA	87.58	60.8	-0.305778	-0.305778	1	heteroscedasticity-corrected standard errors	-1	Central	‘Point estimate with uncertainty’	No	No	NA	No	NA	11	No	NA	NA	NA
1000007	Bensch G., Peters J.	The intensive margin of technology adoption – Experimental evidence on improved cooking stoves in rural Senegal	Today, almost 3 billion people in developing countries rely on biomass as primary cooking fuel, with profound negative implications for their well-being. Improved biomass cooking stoves are alleged to counteract these adverse effects. This paper evaluates take-up and impacts of low-cost improved stoves through a randomized controlled trial. The randomized stove is primarily designed to curb firew…	10.1016/j.jhealeco.2015.03.006	2015	Africa	Senegal	Household	Cookstoves	2009	NA	36	NA	36	228	90	138	Experimental	RCT	firewood consumption per week (kg)	OLS	51	26.96	6.1	1	0.601441	NA	NA	NA	NA	87.65	60.69	-0.307587	-0.307587	1	heteroscedasticity-corrected standard errors	-1	Central	‘Point estimate with uncertainty’	No	No	NA	No	NA	11	No	NA	NA	NA
726	Aung T.W., Jain G., Sethuraman K., Baumgartner J., Reynolds C., Grieshop A.P., Marshall J.D., Brauer M.	health and climate-relevant pollutant concentrations from a carbon-finance approved cookstove intervention in rural india	Efforts to introduce more efficient stoves increasingly leverage carbon-finance to scale up dissemination of interventions. We conducted a randomized intervention study to evaluate a Clean Development Mechanism approved stove replacement impact on fuelwood usage, and climate and health-relevant air pollutants. We randomly assigned 187 households to either receive the intervention or to continue u…	10.1021/acs.est.5b06208	2016	Asia	India	Household	Cookstoves	2011	2011	12	NA	12	166	96	70	Experimental	RCT	fuelwood use (kg/day)	Difference of medians	S17	NA	NA	1	0.140094	NA	NA	NA	0.74	-0.116279	-0.121951	0.00567215	0.00567215	1	Standard errors	1	Central	‘Point estimate with uncertainty’	No	Yes	Positive	No	NA	NA	Yes	-0.01	Central estimate	79
726	Aung T.W., Jain G., Sethuraman K., Baumgartner J., Reynolds C., Grieshop A.P., Marshall J.D., Brauer M.	health and climate-relevant pollutant concentrations from a carbon-finance approved cookstove intervention in rural india	Efforts to introduce more efficient stoves increasingly leverage carbon-finance to scale up dissemination of interventions. We conducted a randomized intervention study to evaluate a Clean Development Mechanism approved stove replacement impact on fuelwood usage, and climate and health-relevant air pollutants. We randomly assigned 187 households to either receive the intervention or to continue u…	10.1021/acs.est.5b06208	2016	Asia	India	Household	Cookstoves	2011	2011	12	NA	12	166	96	70	Experimental	RCT	fuelwood use (kg/day)	Difference of medians	S18	NA	NA	1	0.129077	NA	NA	NA	0.95	-0.2	-0.121951	-0.0780488	-0.0780488	1	Standard errors	-1	Central	‘Point estimate with uncertainty’	No	Yes	Positive	No	NA	NA	Yes	0.12	Central estimate	48
726	Aung T.W., Jain G., Sethuraman K., Baumgartner J., Reynolds C., Grieshop A.P., Marshall J.D., Brauer M.	health and climate-relevant pollutant concentrations from a carbon-finance approved cookstove intervention in rural india	Efforts to introduce more efficient stoves increasingly leverage carbon-finance to scale up dissemination of interventions. We conducted a randomized intervention study to evaluate a Clean Development Mechanism approved stove replacement impact on fuelwood usage, and climate and health-relevant air pollutants. We randomly assigned 187 households to either receive the intervention or to continue u…	10.1021/acs.est.5b06208	2016	Asia	India	Household	Cookstoves	2011	2011	12	NA	12	166	96	70	Experimental	RCT	fuelwood use (kg/day)	Difference of medians	S19	NA	NA	1	0.247428	NA	NA	NA	0.48	-0.025	-0.121951	0.0969512	0.0969512	1	Standard errors	1	Central	‘Point estimate with uncertainty’	No	Yes	Positive	No	NA	NA	Yes	-0.14	Central estimate	31
1047	Bensch and Peters	Alleviating Deforestation Pressures? Impacts of Improved Stove Dissemination on Charcoal Consumption in Urban Senegal	With 2.7 billion people relying on woodfuel for cooking in developing countries, the dissemination of improved cooking stoves (ICSs) is frequently considered an effective instrument to combat deforestation, particularly in arid countries. This paper evaluates the impacts of an ICS dissemination project in urban Senegal on charcoal consumption, using data collected among 624 households. The virtue…	10.3368/le.89.4.676	2013	Africa	Senegal	Household	Cookstoves	2009	2009	12	NA	12	257	NA	NA	Rigorous observational study	Linear regressions + matching	Charcoal savings rate per dish(%)	OLS	691	0.365	0.093	1	0.58	NA	NA	NA	NA	NA	NA	-0.251	-0.251	1	clustered standard errors	-1	Upper bound	‘Point estimate with uncertainty’	No	No	No	No	NA	16	No	NA	NA	NA
1000008	West et al.	Carbon credits from tropical forest conservation projects unlikely to mitigate climate change	Carbon-offset credits traded on voluntary carbon markets largely originate from REDD+ (Reduced Emissions from Deforestation and forest Degradation) projects across the tropics claiming “reductions in forest loss” vis-à-vis baselines established ex-ante. However, these are typically not subjected to counterfactual-based evaluation. We present an ex-post evaluation of the deforestation impacts of 2…	NA	2022	Multiple	Multiple	Forestry	REDD+	2007	2001	156	NA	228	NA	27	NA	Rigorous observational study	Synthetic Control Method	Cumulative deforestation (ha)	NA	5	NA	NA	NA	NA	NA	NA	NA	NA	NA	NA	NA	NA	NA	Confidence interval for placebo	-1	Central estimate	Only point estimate	No	No	NA	No	NA	NA	Yes	0.062	Central estimate	27
NA	Berkouwer, S., Dean, J.	Credit and attention in the adoption of profitable energy efficient technologies in Kenya	We study an energy efficient charcoal cookstove in an experiment with 1,000 households in Nairobi. We estimate a 39 percent reduc- tion in charcoal spending, which matches engineering estimates, generating a 295 percent annual return. Despite fuel savings of $237 over the stove’s two-year lifespan—and $295 in emissions reduc- tions—households are only willing to pay $12. Drawing attention to ener…	10.1257/aer.20210766	2022	Africa	Kenya	Household	Cookstoves	2019	NA	13.9633	NA	14.949	1018	922	96	Experimental	RCT	IHS transformed charcoal in kg	IV	3306	0.48	0.08	1	0.427211	NA	NA	NA	NA	1.55	NA	-0.38	-0.38	NA	Clustered standard errors		Central estimate	‘Point estimate with uncertainty’	No	Yes	Positive	No	NA	6	No	NA	Central estimate	NA
NA	Guizar-Coutiño A. et al	Aglobal evaluation of the effectiveness of voluntary REDD+ projects at reducing deforestation and degradation in the moist tropics	Reducing emissions from deforestation and forest degradation (REDD+) projects aim to contribute to climate change mitigation by protecting and enhancing carbon stocks in tropical forests, but there have been no systematic global evaluations of their impact. We used a new data set for tropical humid forests and a standardized evaluation approach (based on pixel matching) to quantify the performanc…	10.1111/cobi.13970	2022	Multiple	Multiple	Forestry	REDD+	2002	NA	60	NA	60	NA	40	NA	Rigorous observational study	Synthetic Control Method	Mean deforestation rate in first five years of implementation	OLS	1	NA	NA	NA	NA	0.0022	0.0055	-0.0033	NA	NA	NA	NA	NA	NA	Standard errors	-1	Central estimate	‘Point estimate with uncertainty’	No	No	NA	Yes	No evidence of leakage	NA	Yes	0.67738	Central estimate	40
NA	Coffield et al	Using remote sensing to quantify the additional climate benefits of California forest carbon offset projects	Nature-based climate solutions are a vital component of many climate mitigation strategies, including California's, which aims to achieve carbon neutrality by 2045. Most carbon offsets in California's cap-and- trade program come from improved forest management (IFM) projects. Since 2012, various landowners have set up IFM projects following the California Air Resources Board's IFM protocol. As ma…	10.1111/gcb.16380	2022	Northern America	United States of America	Forestry	IFM	2012	1986	108	NA	408	NA	37	NA	Rigorous observational study	Before-after comparison	Carbon accumulation	Mean difference	6798	NA	NA	NA	NA	NA	NA	NA	NA	NA	NA	0	0	NA	Confidence interval	1	Central estimate	‘Point estimate with uncertainty’	No	No	NA	No	NA	NA	Yes	0	Central estimate	37
701	West T.A.P., B√∂rner J., Sills E.O., Kontoleon A.	overstated carbon emission reductions from voluntary redd+ projects in the brazilian amazon	Reducing emissions from deforestation and forest degradation (REDD+) has gained international attention over the past decade, as manifested in both United Nations policy discussions and hundreds of voluntary projects launched to earn carbon-offset credits. There are ongoing discussions about whether and how projects should be integrated into national climate change mitigation efforts under the Pa…	10.1073/pnas.2004334117	2020	Latin America	Brazil	Forestry	REDD+	2009	2001	74	NA	96	NA	12	NA	Rigorous observational study	Synthetic Control Method	Cumulative deforestation (ha)	NA	24190	NA	NA	No	NA	NA	NA	NA	NA	NA	NA	NA	NA	1	Confidence interval for placebo	1	Central estimate	Only point estimate	No	No	NA	No	NA	NA	Yes	0.0135698	Central estimate	12
[truncated: 11 more columns]
